# Supplementary material
Source: PubMed Central journal article supplement (PMC6384137)
Supplement: NIHMS1502314-supplement-Supp_Data.pdf [file NIHMS1502314-supplement-Supp_Data.pdf]

## SUPPORTING INFORMATION

### **Effect of gender on biomarker response in a mouse model of the hematopoietic acute radiation syndrome.**

Jace W. Jones\*, Jenna Alloush\*, Rajendran Sellamuthu†, Hui Lin Chua†, Thomas J. MacVittie‡, Christie M. Orschell†, Maureen A. Kane\*<sup>+</sup>.

\*University of Maryland, School of Pharmacy, Department of Pharmaceutical Sciences, Baltimore, MD; †Indiana University School of Medicine, Indianapolis, IN; ‡University of Maryland, School of Medicine, Department of Radiation Oncology, Baltimore, MD

#### **Correspondence:**

Maureen A. Kane  
University of Maryland, School of Pharmacy  
Department of Pharmaceutical Sciences  
20 N. Pine Street, Room 723  
Baltimore, MD 21201  
Phone: (410) 706-5097  
Fax: (410) 706-0886  
Email: [mkane@rx.umaryland.edu](mailto:mkane@rx.umaryland.edu)

**Supplemental Table 1. Plasma metabolites assayed at 3 days post-8.72 Gy TBI.** All metabolites assayed from 3 mo. old C57BL/6 mice; n=10 for each cohort (Naïve, TBI). Each n=10 cohort had n=5 each of female and male.

**Supplemental Table 2. Basal differences in plasma metabolites between naïve female and male C57BL/6 mice.** Metabolites assayed from 3 mo. old C57BL/6 mice; n=5 for each cohort of female and male.  $p < 0.05$  between grouped cohorts of naïve and TBI.

**Supplemental Table 3. Plasma metabolites in naïve female and male C57BL/6 mice.** All metabolites assayed from 3 mo. old C57BL/6 mice; n=5 for each cohort of female and male.

**Supplemental Table 4. Plasma metabolites assayed at 3 days post-8.72 Gy TBI: Female single-sex cohort.** All metabolites assayed from 3 mo. old C57BL/6 mice; n=5 for each cohort (Naïve, TBI).

**Supplemental Table 5. Plasma metabolites assayed at 3 days post-8.72 Gy TBI: Male single-sex cohort.** All metabolites assayed from 3 mo. old C57BL/6 mice; n=5 for each cohort (Naïve, TBI).

### Supplemental Table 1. Plasma metabolites assayed at 3 days post-8.72 Gy TBI

Metabolites assayed from 3 mo. old C57BL/6 mice; n=10 for each cohort (Naïve, TBI). Each n=10 cohort had n=5 each of female and male.

| Metabolite |             | Naïve F and M |      |      |       |    | TBI_F and M |      |      |       |    | p value<br>Naïve vs<br>TBI | Differential<br>Expression<br>(up) | *<br>FDR<br><5% | Class |
|------------|-------------|---------------|------|------|-------|----|-------------|------|------|-------|----|----------------------------|------------------------------------|-----------------|-------|
|            |             | Mean          | SD   | SEM  | %CV   | N  | Mean        | SD   | SEM  | %CV   | N  |                            |                                    |                 |       |
| 1          | C0          | 22.01         | 3.13 | 0.99 | 14.23 | 10 | 18.70       | 2.66 | 0.84 | 14.24 | 10 | 0.0202                     | Naïve                              |                 | AC    |
| 2          | C10         | 0.26          | 0.07 | 0.02 | 25.99 | 10 | 0.26        | 0.08 | 0.02 | 30.37 | 10 | 0.9484                     | Naïve                              |                 | AC    |
| 3          | C10-1       | 0.12          | 0.03 | 0.01 | 27.30 | 10 | 0.13        | 0.03 | 0.01 | 27.31 | 10 | 0.8762                     | TBI                                |                 | AC    |
| 4          | C10-2       | 0.14          | 0.03 | 0.01 | 20.89 | 10 | 0.14        | 0.03 | 0.01 | 24.18 | 10 | 0.9874                     | TBI                                |                 | AC    |
| 5          | C12         | 0.29          | 0.12 | 0.04 | 39.99 | 10 | 0.31        | 0.13 | 0.04 | 42.88 | 10 | 0.7105                     | TBI                                |                 | AC    |
| 6          | C12-DC      | 0.46          | 0.05 | 0.02 | 10.33 | 10 | 0.49        | 0.05 | 0.02 | 10.65 | 10 | 0.2587                     | TBI                                |                 | AC    |
| 7          | C12-1       | 0.28          | 0.05 | 0.01 | 16.66 | 10 | 0.28        | 0.06 | 0.02 | 22.08 | 10 | 0.9747                     | Naïve                              |                 | AC    |
| 8          | C14         | 0.16          | 0.05 | 0.02 | 30.58 | 10 | 0.15        | 0.05 | 0.01 | 31.13 | 10 | 0.7975                     | Naïve                              |                 | AC    |
| 9          | C14-1       | 0.07          | 0.02 | 0.01 | 28.85 | 10 | 0.08        | 0.02 | 0.01 | 31.61 | 10 | 0.8004                     | TBI                                |                 | AC    |
| 10         | C14-1 OH    | 0.08          | 0.03 | 0.01 | 41.86 | 10 | 0.08        | 0.03 | 0.01 | 42.08 | 10 | 0.9135                     | TBI                                |                 | AC    |
| 11         | C14-2       | 0.05          | 0.01 | 0.00 | 31.36 | 10 | 0.05        | 0.02 | 0.00 | 32.33 | 10 | 0.8256                     | TBI                                |                 | AC    |
| 12         | C14-2 OH    | 0.10          | 0.03 | 0.01 | 26.11 | 10 | 0.10        | 0.03 | 0.01 | 31.09 | 10 | 0.7754                     | TBI                                |                 | AC    |
| 13         | C16         | 0.24          | 0.05 | 0.02 | 20.17 | 10 | 0.21        | 0.05 | 0.02 | 23.37 | 10 | 0.2407                     | Naïve                              |                 | AC    |
| 14         | C16-OH      | 0.10          | 0.04 | 0.01 | 37.07 | 10 | 0.11        | 0.05 | 0.01 | 41.87 | 10 | 0.6735                     | TBI                                |                 | AC    |
| 15         | C16-1       | 0.14          | 0.03 | 0.01 | 23.83 | 10 | 0.12        | 0.04 | 0.01 | 37.60 | 10 | 0.2555                     | Naïve                              |                 | AC    |
| 16         | C16-1 OH    | 0.09          | 0.04 | 0.01 | 43.27 | 10 | 0.09        | 0.04 | 0.01 | 46.59 | 10 | 0.6659                     | TBI                                |                 | AC    |
| 17         | C16-2       | 0.05          | 0.01 | 0.00 | 26.83 | 10 | 0.05        | 0.02 | 0.01 | 30.49 | 10 | 0.7807                     | TBI                                |                 | AC    |
| 18         | C16-2 OH    | 0.07          | 0.02 | 0.01 | 31.26 | 10 | 0.07        | 0.02 | 0.01 | 34.34 | 10 | 0.8510                     | TBI                                |                 | AC    |
| 19         | C18         | 0.11          | 0.03 | 0.01 | 26.15 | 10 | 0.11        | 0.04 | 0.01 | 33.71 | 10 | 0.6452                     | TBI                                |                 | AC    |
| 20         | C18-1       | 0.19          | 0.08 | 0.02 | 41.05 | 10 | 0.18        | 0.07 | 0.02 | 37.34 | 10 | 0.8173                     | Naïve                              |                 | AC    |
| 21         | C18-1 OH    | 0.07          | 0.02 | 0.01 | 31.59 | 10 | 0.07        | 0.02 | 0.01 | 33.42 | 10 | 0.6086                     | TBI                                |                 | AC    |
| 22         | C18-2       | 0.08          | 0.02 | 0.01 | 25.67 | 10 | 0.08        | 0.02 | 0.01 | 23.20 | 10 | 0.5767                     | Naïve                              |                 | AC    |
| 23         | C2          | 15.40         | 2.58 | 0.82 | 16.75 | 10 | 13.02       | 1.66 | 0.53 | 12.76 | 10 | 0.0247                     | Naïve                              |                 | AC    |
| 24         | C3          | 0.47          | 0.12 | 0.04 | 25.04 | 10 | 0.45        | 0.10 | 0.03 | 22.85 | 10 | 0.6182                     | Naïve                              |                 | AC    |
| 25         | C3-DC_C4-OH | 0.22          | 0.07 | 0.02 | 31.66 | 10 | 0.19        | 0.05 | 0.02 | 25.57 | 10 | 0.2631                     | Naïve                              |                 | AC    |

**Supplemental Table 1.** (continued)

| Metabolite |               | Naïve F and M |        |       |       |    | TBI_F and M |        |       |       |    | p value<br>Naïve<br>vs TBI | Differential<br>Expression<br>(up) | *<br>FDR<br><5% | Class |
|------------|---------------|---------------|--------|-------|-------|----|-------------|--------|-------|-------|----|----------------------------|------------------------------------|-----------------|-------|
|            |               | Mean          | SD     | SEM   | %CV   | N  | Mean        | SD     | SEM   | %CV   | N  |                            |                                    |                 |       |
| 26         | C3-OH         | 0.14          | 0.04   | 0.01  | 29.05 | 10 | 0.14        | 0.05   | 0.01  | 31.99 | 10 | 0.6705                     | TBI                                |                 | AC    |
| 27         | C3-1          | 0.09          | 0.04   | 0.01  | 41.87 | 10 | 0.10        | 0.05   | 0.01  | 45.26 | 10 | 0.4414                     | TBI                                |                 | AC    |
| 28         | C4            | 0.39          | 0.12   | 0.04  | 31.06 | 10 | 0.36        | 0.11   | 0.03  | 30.55 | 10 | 0.5043                     | Naïve                              |                 | AC    |
| 29         | C4-1          | 0.10          | 0.03   | 0.01  | 28.65 | 10 | 0.11        | 0.03   | 0.01  | 28.18 | 10 | 0.4941                     | TBI                                |                 | AC    |
| 30         | C5            | 0.17          | 0.06   | 0.02  | 32.38 | 10 | 0.16        | 0.06   | 0.02  | 34.15 | 10 | 0.7230                     | Naïve                              |                 | AC    |
| 31         | C5-DC_C6-OH   | 0.25          | 0.12   | 0.04  | 49.89 | 10 | 0.26        | 0.14   | 0.04  | 51.80 | 10 | 0.8443                     | TBI                                |                 | AC    |
| 32         | C5-M-DC       | 0.18          | 0.07   | 0.02  | 39.35 | 10 | 0.19        | 0.08   | 0.03  | 43.08 | 10 | 0.8281                     | TBI                                |                 | AC    |
| 33         | C5-OH_C3-DC-M | 0.15          | 0.04   | 0.01  | 27.79 | 10 | 0.15        | 0.05   | 0.02  | 32.17 | 10 | 0.8095                     | Naïve                              |                 | AC    |
| 34         | C5-1          | 0.09          | 0.03   | 0.01  | 38.15 | 10 | 0.09        | 0.04   | 0.01  | 40.13 | 10 | 0.8547                     | TBI                                |                 | AC    |
| 35         | C5-1 DC       | 0.49          | 0.28   | 0.09  | 56.26 | 10 | 0.52        | 0.31   | 0.10  | 59.25 | 10 | 0.8502                     | TBI                                |                 | AC    |
| 36         | C6_C4-1 DC    | 0.21          | 0.10   | 0.03  | 48.66 | 10 | 0.22        | 0.11   | 0.04  | 51.10 | 10 | 0.8196                     | TBI                                |                 | AC    |
| 37         | C6-1          | 0.14          | 0.07   | 0.02  | 48.36 | 10 | 0.15        | 0.08   | 0.02  | 50.37 | 10 | 0.7418                     | TBI                                |                 | AC    |
| 38         | C7-DC         | 0.06          | 0.03   | 0.01  | 46.20 | 10 | 0.06        | 0.02   | 0.01  | 38.80 | 10 | 0.8214                     | Naïve                              |                 | AC    |
| 39         | C8            | 0.12          | 0.04   | 0.01  | 34.87 | 10 | 0.12        | 0.03   | 0.01  | 26.52 | 10 | 0.8193                     | Naïve                              |                 | AC    |
| 40         | C9            | 0.25          | 0.06   | 0.02  | 24.26 | 10 | 0.25        | 0.06   | 0.02  | 25.65 | 10 | 0.8525                     | TBI                                |                 | AC    |
| 41         | Ala           | 719.30        | 160.40 | 50.72 | 22.30 | 10 | 840.30      | 226.37 | 71.58 | 26.94 | 10 | 0.1847                     | TBI                                |                 | AA    |
| 42         | Arg           | 106.11        | 21.95  | 6.94  | 20.68 | 10 | 93.75       | 18.20  | 5.75  | 19.41 | 10 | 0.1872                     | Naïve                              |                 | AA    |
| 43         | Asn           | 64.19         | 19.43  | 6.14  | 30.26 | 10 | 65.96       | 19.52  | 6.17  | 29.60 | 10 | 0.8412                     | TBI                                |                 | AA    |
| 44         | Asp           | 8.79          | 2.28   | 0.72  | 25.95 | 10 | 9.04        | 3.52   | 1.11  | 38.90 | 10 | 0.8496                     | TBI                                |                 | AA    |
| 45         | Cit           | 71.37         | 13.61  | 4.31  | 19.08 | 10 | 36.04       | 9.09   | 2.88  | 25.23 | 10 | 0.0000                     | Naïve                              | *               | AA    |
| 46         | Gln           | 718.00        | 125.45 | 39.67 | 17.47 | 10 | 768.20      | 89.45  | 28.29 | 11.64 | 10 | 0.3165                     | TBI                                |                 | AA    |
| 47         | Glu           | 43.20         | 11.61  | 3.67  | 26.88 | 10 | 38.08       | 8.71   | 2.75  | 22.88 | 10 | 0.2794                     | Naïve                              |                 | AA    |
| 48         | Gly           | 244.90        | 37.94  | 12.00 | 15.49 | 10 | 249.10      | 49.78  | 15.74 | 19.98 | 10 | 0.8343                     | TBI                                |                 | AA    |
| 49         | Ile           | 126.45        | 18.03  | 5.70  | 14.26 | 10 | 129.37      | 29.02  | 9.18  | 22.43 | 10 | 0.7900                     | TBI                                |                 | AA    |
| 50         | Leu           | 285.40        | 72.64  | 22.97 | 25.45 | 10 | 320.10      | 105.91 | 33.49 | 33.09 | 10 | 0.4041                     | TBI                                |                 | AA    |

**Supplemental Table 1.** (continued)

| Metabolite |            | Naïve F and M |       |       |       |    | TBI_F and M |       |           |       |    | p value<br>Naïve<br>vs TBI | Differential<br>Expression<br>(up) | *<br>FDR<br><5% | Class |
|------------|------------|---------------|-------|-------|-------|----|-------------|-------|-----------|-------|----|----------------------------|------------------------------------|-----------------|-------|
|            |            | Mean          | SD    | SEM   | %CV   | N  | Mean        | SD    | SEM       | %CV   | N  |                            |                                    |                 |       |
| 51         | Lys        | 328.50        | 73.86 | 23.36 | 22.48 | 10 | 383.60      | 61.08 | 19.3<br>1 | 15.92 | 10 | 0.0857                     | TBI                                |                 | AA    |
| 52         | Met        | 81.66         | 33.54 | 10.61 | 41.07 | 10 | 82.40       | 25.69 | 8.12      | 31.18 | 10 | 0.9564                     | TBI                                |                 | AA    |
| 53         | Orn        | 61.00         | 19.29 | 6.10  | 31.62 | 10 | 60.26       | 14.35 | 4.54      | 23.81 | 10 | 0.9235                     | Naïve                              |                 | AA    |
| 54         | Phe        | 79.11         | 12.74 | 4.03  | 16.10 | 10 | 84.10       | 14.51 | 4.59      | 17.25 | 10 | 0.4244                     | TBI                                |                 | AA    |
| 55         | Pro        | 158.44        | 51.58 | 16.31 | 32.56 | 10 | 176.45      | 66.70 | 21.0<br>9 | 37.80 | 10 | 0.5080                     | TBI                                |                 | AA    |
| 56         | Ser        | 172.70        | 48.67 | 15.39 | 28.18 | 10 | 215.70      | 74.06 | 23.4<br>2 | 34.33 | 10 | 0.1423                     | TBI                                |                 | AA    |
| 57         | Thr        | 209.50        | 51.21 | 16.19 | 24.45 | 10 | 244.00      | 33.24 | 10.5<br>1 | 13.62 | 10 | 0.0908                     | TBI                                |                 | AA    |
| 58         | Trp        | 87.83         | 22.28 | 7.05  | 25.37 | 10 | 102.41      | 22.35 | 7.07      | 21.82 | 10 | 0.1613                     | TBI                                |                 | AA    |
| 59         | Tyr        | 91.94         | 18.97 | 6.00  | 20.63 | 10 | 106.02      | 30.46 | 9.63      | 28.73 | 10 | 0.2306                     | TBI                                |                 | AA    |
| 60         | Val        | 212.00        | 40.76 | 12.89 | 19.23 | 10 | 213.50      | 37.34 | 11.8<br>1 | 17.49 | 10 | 0.9326                     | TBI                                |                 | AA    |
| 61         | Ac-Orn     | 2.18          | 0.33  | 0.11  | 15.28 | 10 | 1.56        | 0.53  | 0.17      | 33.83 | 10 | 0.0053                     | Naïve                              |                 | BA    |
| 62         | ADMA       | 0.73          | 0.14  | 0.04  | 18.78 | 10 | 0.62        | 0.11  | 0.03      | 17.29 | 10 | 0.0621                     | Naïve                              |                 | BA    |
| 63         | alpha-AAA  | 10.46         | 3.11  | 0.98  | 29.76 | 10 | 6.96        | 1.63  | 0.51      | 23.37 | 10 | 0.0055                     | Naïve                              |                 | BA    |
| 64         | Creatinine | 6.34          | 1.07  | 0.34  | 16.85 | 10 | 5.41        | 0.86  | 0.27      | 15.94 | 10 | 0.0463                     | Naïve                              |                 | BA    |
| 65         | Kynurenine | 1.10          | 0.25  | 0.08  | 22.39 | 10 | 1.29        | 0.36  | 0.11      | 27.65 | 10 | 0.1802                     | TBI                                |                 | BA    |
| 66         | Met-SO     | 2.45          | 1.27  | 0.40  | 51.93 | 10 | 2.32        | 0.80  | 0.25      | 34.51 | 10 | 0.7851                     | Naïve                              |                 | BA    |
| 67         | Spermidine | 1.07          | 0.25  | 0.08  | 23.03 | 10 | 0.66        | 0.16  | 0.05      | 24.21 | 10 | 0.0004                     | Naïve                              | *               | BA    |
| 68         | Spermine   | 0.45          | 0.10  | 0.03  | 22.50 | 10 | 0.42        | 0.13  | 0.04      | 31.37 | 10 | 0.5488                     | Naïve                              |                 | BA    |
| 69         | Taurine    | 521.20        | 90.15 | 28.51 | 17.30 | 10 | 458.40      | 64.44 | 20.3<br>8 | 14.06 | 10 | 0.0899                     | Naïve                              |                 | BA    |
| 70         | total DMA  | 0.59          | 0.05  | 0.02  | 8.34  | 10 | 0.52        | 0.04  | 0.01      | 7.79  | 10 | 0.0060                     | Naïve                              |                 | BA    |
| 71         | LPC_14-0   | 3.03          | 0.47  | 0.15  | 15.61 | 10 | 2.82        | 0.33  | 0.11      | 11.84 | 10 | 0.2784                     | Naïve                              |                 | LPC   |
| 72         | LPC_16-0   | 146.40        | 31.12 | 9.84  | 21.26 | 10 | 149.02      | 23.48 | 7.42      | 15.75 | 10 | 0.8338                     | TBI                                |                 | LPC   |
| 73         | LPC_16-1   | 3.25          | 0.85  | 0.27  | 26.23 | 10 | 3.06        | 0.48  | 0.15      | 15.69 | 10 | 0.5457                     | Naïve                              |                 | LPC   |
| 74         | LPC_17-0   | 2.19          | 0.43  | 0.14  | 19.77 | 10 | 2.20        | 0.44  | 0.14      | 19.89 | 10 | 0.9620                     | TBI                                |                 | LPC   |
| 75         | LPC_18-0   | 63.82         | 9.62  | 3.04  | 15.08 | 10 | 65.07       | 7.02  | 2.22      | 10.79 | 10 | 0.7450                     | TBI                                |                 | LPC   |

**Supplemental Table 1.** (continued)

|            |          | Naïve F and M |           |       |       |    | TBI_F and M |       |       |       |    | p value<br>Naïve vs<br>TBI | Differential<br>Expression<br>(up) | *<br>FDR<br><5% | Class |
|------------|----------|---------------|-----------|-------|-------|----|-------------|-------|-------|-------|----|----------------------------|------------------------------------|-----------------|-------|
| Metabolite |          | Mean          | SD        | SEM   | %CV   | N  | Mean        | SD    | SEM   | %CV   | N  |                            |                                    |                 |       |
| 76         | LPC_18-1 | 28.43         | 5.66      | 1.79  | 19.91 | 10 | 25.07       | 3.57  | 1.13  | 14.25 | 10 | 0.1294                     | Naïve                              |                 | LPC   |
| 77         | LPC_18-2 | 117.78        | 18.4<br>1 | 5.82  | 15.63 | 10 | 109.31      | 16.04 | 5.07  | 14.67 | 10 | 0.2875                     | Naïve                              |                 | LPC   |
| 78         | LPC_20-3 | 5.32          | 1.65      | 0.52  | 30.99 | 10 | 3.74        | 0.97  | 0.31  | 25.80 | 10 | 0.0173                     | Naïve                              |                 | LPC   |
| 79         | LPC_20-4 | 29.08         | 6.20      | 1.96  | 21.33 | 10 | 29.23       | 2.72  | 0.86  | 9.29  | 10 | 0.9449                     | TBI                                |                 | LPC   |
| 80         | LPC_24-0 | 0.40          | 0.11      | 0.03  | 27.08 | 10 | 0.43        | 0.07  | 0.02  | 16.72 | 10 | 0.4021                     | TBI                                |                 | LPC   |
| 81         | LPC_26-0 | 0.21          | 0.04      | 0.01  | 20.52 | 10 | 0.24        | 0.05  | 0.01  | 19.97 | 10 | 0.2011                     | TBI                                |                 | LPC   |
| 82         | LPC_26-1 | 0.10          | 0.03      | 0.01  | 24.99 | 10 | 0.12        | 0.03  | 0.01  | 22.73 | 10 | 0.2635                     | TBI                                |                 | LPC   |
| 83         | LPC_28-0 | 0.26          | 0.05      | 0.02  | 19.96 | 10 | 0.30        | 0.07  | 0.02  | 24.88 | 10 | 0.1991                     | TBI                                |                 | LPC   |
| 84         | LPC_28-1 | 0.18          | 0.04      | 0.01  | 23.05 | 10 | 0.20        | 0.04  | 0.01  | 22.07 | 10 | 0.4099                     | TBI                                |                 | LPC   |
| 85         | PC_24-0  | 0.12          | 0.03      | 0.01  | 22.25 | 10 | 0.11        | 0.02  | 0.01  | 16.01 | 10 | 0.5484                     | Naïve                              |                 | PC    |
| 86         | PC_26-0  | 0.71          | 0.13      | 0.04  | 18.08 | 10 | 0.80        | 0.13  | 0.04  | 16.51 | 10 | 0.1467                     | TBI                                |                 | PC    |
| 87         | PC_28-1  | 0.22          | 0.04      | 0.01  | 17.95 | 10 | 0.25        | 0.05  | 0.02  | 21.12 | 10 | 0.3336                     | TBI                                |                 | PC    |
| 88         | PC_30-0  | 0.71          | 0.15      | 0.05  | 20.38 | 10 | 0.73        | 0.13  | 0.04  | 17.80 | 10 | 0.8474                     | TBI                                |                 | PC    |
| 89         | PC_30-2  | 0.07          | 0.02      | 0.01  | 29.23 | 10 | 0.07        | 0.02  | 0.01  | 24.06 | 10 | 0.6783                     | TBI                                |                 | PC    |
| 90         | PC_32-0  | 11.82         | 2.88      | 0.91  | 24.41 | 10 | 13.04       | 2.33  | 0.74  | 17.86 | 10 | 0.3100                     | TBI                                |                 | PC    |
| 91         | PC_32-1  | 3.49          | 1.24      | 0.39  | 35.43 | 10 | 3.75        | 1.08  | 0.34  | 28.80 | 10 | 0.6261                     | TBI                                |                 | PC    |
| 92         | PC_32-2  | 1.15          | 0.30      | 0.10  | 26.33 | 10 | 1.23        | 0.27  | 0.08  | 21.57 | 10 | 0.5472                     | TBI                                |                 | PC    |
| 93         | PC_32-3  | 0.17          | 0.04      | 0.01  | 24.20 | 10 | 0.16        | 0.03  | 0.01  | 17.63 | 10 | 0.3871                     | Naïve                              |                 | PC    |
| 94         | PC_34-1  | 82.99         | 25.8<br>9 | 8.19  | 31.20 | 10 | 74.80       | 20.46 | 6.47  | 27.35 | 10 | 0.4428                     | Naïve                              |                 | PC    |
| 95         | PC_34-2  | 337.49        | 61.6<br>3 | 19.49 | 18.26 | 10 | 344.27      | 57.18 | 18.08 | 16.61 | 10 | 0.8015                     | TBI                                |                 | PC    |
| 96         | PC_34-3  | 13.56         | 4.92      | 1.55  | 36.25 | 10 | 15.28       | 4.83  | 1.53  | 31.61 | 10 | 0.4406                     | TBI                                |                 | PC    |
| 97         | PC_34-4  | 0.52          | 0.19      | 0.06  | 36.22 | 10 | 0.58        | 0.18  | 0.06  | 31.03 | 10 | 0.5076                     | TBI                                |                 | PC    |
| 98         | PC_36-0  | 2.03          | 0.42      | 0.13  | 20.42 | 10 | 2.12        | 0.24  | 0.08  | 11.50 | 10 | 0.5655                     | TBI                                |                 | PC    |
| 99         | PC_36-1  | 20.45         | 5.28      | 1.67  | 25.81 | 10 | 17.17       | 4.04  | 1.28  | 23.54 | 10 | 0.1361                     | Naïve                              |                 | PC    |
| 100        | PC_36-2  | 222.95        | 38.6<br>3 | 12.22 | 17.33 | 10 | 211.10      | 32.01 | 10.12 | 15.17 | 10 | 0.4650                     | Naïve                              |                 | PC    |

**Supplemental Table 1.** (continued)

| Metabolite |           | Naïve F and M |       |       |       |    | TBI_F and M |       |       |       |    | p value<br>Naïve vs<br>TBI | Differential<br>Expression<br>(up) | *<br>FDR<br><5% | Class |
|------------|-----------|---------------|-------|-------|-------|----|-------------|-------|-------|-------|----|----------------------------|------------------------------------|-----------------|-------|
|            |           | Mean          | SD    | SEM   | %CV   | N  | Mean        | SD    | SEM   | %CV   | N  |                            |                                    |                 |       |
| 101        | PC_36-3   | 88.00         | 23.55 | 7.45  | 26.76 | 10 | 79.29       | 18.14 | 5.74  | 22.88 | 10 | 0.3666                     | Naïve                              |                 | PC    |
| 102        | PC_36-4   | 137.69        | 39.93 | 12.63 | 29.00 | 10 | 151.80      | 32.37 | 10.23 | 21.32 | 10 | 0.3970                     | TBI                                |                 | PC    |
| 103        | PC_36-5   | 7.41          | 2.56  | 0.81  | 34.56 | 10 | 8.25        | 2.53  | 0.80  | 30.64 | 10 | 0.4730                     | TBI                                |                 | PC    |
| 104        | PC_36-6   | 0.35          | 0.12  | 0.04  | 33.43 | 10 | 0.39        | 0.11  | 0.03  | 27.25 | 10 | 0.4230                     | TBI                                |                 | PC    |
| 105        | PC_38-0   | 1.54          | 0.44  | 0.14  | 28.72 | 10 | 1.38        | 0.21  | 0.07  | 15.46 | 10 | 0.3173                     | Naïve                              |                 | PC    |
| 106        | PC_38-1   | 0.45          | 0.14  | 0.05  | 31.93 | 10 | 0.39        | 0.05  | 0.02  | 13.25 | 10 | 0.2580                     | Naïve                              |                 | PC    |
| 107        | PC_38-3   | 22.51         | 6.57  | 2.08  | 29.19 | 10 | 18.24       | 5.14  | 1.62  | 28.17 | 10 | 0.1222                     | Naïve                              |                 | PC    |
| 108        | PC_38-4   | 90.16         | 19.12 | 6.05  | 21.21 | 10 | 98.82       | 13.51 | 4.27  | 13.67 | 10 | 0.2570                     | TBI                                |                 | PC    |
| 109        | PC_38-5   | 29.19         | 8.92  | 2.82  | 30.54 | 10 | 30.18       | 8.07  | 2.55  | 26.72 | 10 | 0.7977                     | TBI                                |                 | PC    |
| 110        | PC_38-6   | 107.02        | 33.67 | 10.65 | 31.46 | 10 | 119.71      | 27.17 | 8.59  | 22.70 | 10 | 0.3661                     | TBI                                |                 | PC    |
| 111        | PC_40-1   | 0.32          | 0.06  | 0.02  | 17.44 | 10 | 0.31        | 0.03  | 0.01  | 11.15 | 10 | 0.6040                     | Naïve                              |                 | PC    |
| 112        | PC_40-2   | 0.34          | 0.14  | 0.04  | 40.13 | 10 | 0.28        | 0.09  | 0.03  | 31.30 | 10 | 0.2809                     | Naïve                              |                 | PC    |
| 113        | PC_40-3   | 0.43          | 0.23  | 0.07  | 54.27 | 10 | 0.36        | 0.16  | 0.05  | 45.39 | 10 | 0.4782                     | Naïve                              |                 | PC    |
| 114        | PC_40-4   | 1.93          | 0.89  | 0.28  | 46.32 | 10 | 1.64        | 0.69  | 0.22  | 42.10 | 10 | 0.4329                     | Naïve                              |                 | PC    |
| 115        | PC_40-5   | 3.52          | 1.09  | 0.35  | 31.00 | 10 | 3.16        | 1.03  | 0.32  | 32.48 | 10 | 0.4583                     | Naïve                              |                 | PC    |
| 116        | PC_40-6   | 35.77         | 7.28  | 2.30  | 20.36 | 10 | 38.15       | 5.17  | 1.64  | 13.55 | 10 | 0.4096                     | TBI                                |                 | PC    |
| 117        | PC_42-0   | 0.21          | 0.04  | 0.01  | 18.10 | 10 | 0.20        | 0.03  | 0.01  | 13.26 | 10 | 0.6915                     | Naïve                              |                 | PC    |
| 118        | PC_42-1   | 0.14          | 0.02  | 0.01  | 16.95 | 10 | 0.15        | 0.02  | 0.01  | 11.32 | 10 | 0.7785                     | TBI                                |                 | PC    |
| 119        | PC_42-2   | 0.20          | 0.05  | 0.02  | 25.53 | 10 | 0.18        | 0.04  | 0.01  | 23.21 | 10 | 0.3822                     | Naïve                              |                 | PC    |
| 120        | PC_42-4   | 0.20          | 0.06  | 0.02  | 32.80 | 10 | 0.18        | 0.04  | 0.01  | 22.01 | 10 | 0.5833                     | Naïve                              |                 | PC    |
| 121        | PC_42-5   | 0.26          | 0.09  | 0.03  | 33.71 | 10 | 0.25        | 0.07  | 0.02  | 27.09 | 10 | 0.8141                     | Naïve                              |                 | PC    |
| 122        | PC_42-6   | 0.70          | 0.34  | 0.11  | 48.34 | 10 | 0.63        | 0.27  | 0.09  | 43.29 | 10 | 0.6403                     | Naïve                              |                 | PC    |
| 123        | PC_O-30-0 | 0.13          | 0.02  | 0.01  | 18.70 | 10 | 0.14        | 0.03  | 0.01  | 20.80 | 10 | 0.6131                     | TBI                                |                 | PC    |
| 124        | PC_O-30-1 | 0.12          | 0.04  | 0.01  | 33.50 | 10 | 0.12        | 0.03  | 0.01  | 26.62 | 10 | 0.8074                     | TBI                                |                 | PC    |
| 125        | PC_O-30-2 | 0.06          | 0.01  | 0.00  | 22.56 | 10 | 0.06        | 0.01  | 0.00  | 20.33 | 10 | 0.8895                     | Naïve                              |                 | PC    |

**Supplemental Table 1.** (continued)

|            |           | Naïve F and M |      |      |       |    | TBI_F and M |      |      |       |    | p value<br>Naïve<br>vs TBI | Differential<br>Expression<br>(up) | *<br>FDR<br><5% | Class |
|------------|-----------|---------------|------|------|-------|----|-------------|------|------|-------|----|----------------------------|------------------------------------|-----------------|-------|
| Metabolite |           | Mean          | SD   | SEM  | %CV   | N  | Mean        | SD   | SEM  | %CV   | N  |                            |                                    |                 |       |
| 126        | PC_O-32-1 | 0.51          | 0.14 | 0.05 | 27.88 | 10 | 0.57        | 0.11 | 0.03 | 18.60 | 10 | 0.3004                     | TBI                                |                 | PC    |
| 127        | PC_O-32-2 | 0.22          | 0.08 | 0.03 | 37.37 | 10 | 0.19        | 0.05 | 0.02 | 26.89 | 10 | 0.3668                     | Naïve                              |                 | PC    |
| 128        | PC_O-34-0 | 0.41          | 0.09 | 0.03 | 21.41 | 10 | 0.46        | 0.12 | 0.04 | 25.78 | 10 | 0.3066                     | TBI                                |                 | PC    |
| 129        | PC_O-34-1 | 2.57          | 0.74 | 0.23 | 28.82 | 10 | 2.50        | 0.50 | 0.16 | 19.93 | 10 | 0.7866                     | Naïve                              |                 | PC    |
| 130        | PC_O-34-2 | 3.82          | 1.21 | 0.38 | 31.65 | 10 | 3.64        | 1.06 | 0.33 | 29.07 | 10 | 0.7285                     | Naïve                              |                 | PC    |
| 131        | PC_O-34-3 | 1.13          | 0.38 | 0.12 | 33.53 | 10 | 0.88        | 0.24 | 0.08 | 27.61 | 10 | 0.0989                     | Naïve                              |                 | PC    |
| 132        | PC_O-36-0 | 0.43          | 0.10 | 0.03 | 22.32 | 10 | 0.46        | 0.10 | 0.03 | 22.09 | 10 | 0.6138                     | TBI                                |                 | PC    |
| 133        | PC_O-36-1 | 1.98          | 0.44 | 0.14 | 22.48 | 10 | 1.81        | 0.41 | 0.13 | 22.69 | 10 | 0.3927                     | Naïve                              |                 | PC    |
| 134        | PC_O-36-2 | 9.79          | 2.67 | 0.84 | 27.29 | 10 | 8.98        | 2.13 | 0.67 | 23.72 | 10 | 0.4603                     | Naïve                              |                 | PC    |
| 135        | PC_O-36-3 | 2.11          | 0.65 | 0.20 | 30.68 | 10 | 2.07        | 0.57 | 0.18 | 27.82 | 10 | 0.8741                     | Naïve                              |                 | PC    |
| 136        | PC_O-36-4 | 3.48          | 1.20 | 0.38 | 34.47 | 10 | 3.27        | 0.70 | 0.22 | 21.43 | 10 | 0.6380                     | Naïve                              |                 | PC    |
| 137        | PC_O-36-5 | 1.77          | 0.50 | 0.16 | 28.06 | 10 | 1.72        | 0.28 | 0.09 | 16.28 | 10 | 0.7981                     | Naïve                              |                 | PC    |
| 138        | PC_O-38-0 | 2.39          | 1.02 | 0.32 | 42.84 | 10 | 2.63        | 0.80 | 0.25 | 30.44 | 10 | 0.5666                     | TBI                                |                 | PC    |
| 139        | PC_O-38-1 | 0.69          | 0.22 | 0.07 | 31.41 | 10 | 0.58        | 0.14 | 0.05 | 24.81 | 10 | 0.1968                     | Naïve                              |                 | PC    |
| 140        | PC_O-38-2 | 5.84          | 2.62 | 0.83 | 44.90 | 10 | 4.54        | 1.75 | 0.55 | 38.40 | 10 | 0.2086                     | Naïve                              |                 | PC    |
| 141        | PC_O-38-3 | 1.74          | 0.50 | 0.16 | 28.82 | 10 | 1.48        | 0.35 | 0.11 | 23.61 | 10 | 0.1972                     | Naïve                              |                 | PC    |
| 142        | PC_O-38-4 | 3.95          | 1.07 | 0.34 | 27.16 | 10 | 4.07        | 0.77 | 0.24 | 18.93 | 10 | 0.7789                     | TBI                                |                 | PC    |
| 143        | PC_O-38-5 | 3.04          | 0.98 | 0.31 | 32.23 | 10 | 2.74        | 0.55 | 0.17 | 19.87 | 10 | 0.4142                     | Naïve                              |                 | PC    |
| 144        | PC_O-38-6 | 2.24          | 0.81 | 0.25 | 35.91 | 10 | 2.10        | 0.50 | 0.16 | 23.66 | 10 | 0.6254                     | Naïve                              |                 | PC    |
| 145        | PC_O-40-1 | 3.03          | 1.25 | 0.40 | 41.25 | 10 | 3.44        | 1.27 | 0.40 | 36.86 | 10 | 0.4694                     | TBI                                |                 | PC    |
| 146        | PC_O-40-2 | 0.66          | 0.17 | 0.05 | 26.21 | 10 | 0.64        | 0.17 | 0.05 | 26.10 | 10 | 0.7497                     | Naïve                              |                 | PC    |
| 147        | PC_O-40-3 | 0.57          | 0.18 | 0.06 | 31.82 | 10 | 0.49        | 0.10 | 0.03 | 20.73 | 10 | 0.2456                     | Naïve                              |                 | PC    |
| 148        | PC_O-40-4 | 1.63          | 0.61 | 0.19 | 37.25 | 10 | 1.62        | 0.48 | 0.15 | 29.58 | 10 | 0.9901                     | Naïve                              |                 | PC    |
| 149        | PC_O-40-5 | 0.94          | 0.24 | 0.08 | 25.85 | 10 | 0.88        | 0.15 | 0.05 | 17.01 | 10 | 0.5616                     | Naïve                              |                 | PC    |
| 150        | PC_O-40-6 | 2.53          | 0.68 | 0.22 | 26.90 | 10 | 2.52        | 0.45 | 0.14 | 17.73 | 10 | 0.9661                     | Naïve                              |                 | PC    |

**Supplemental Table 1.** (continued)

| Metabolite |            | Naïve F and M |         |        |       |    | TBI_F and M |         |        |       |    | P value<br>Naïve<br>vs<br>TBI | Differential<br>Expression<br>(up) | *<br>FDR<5% | Class |
|------------|------------|---------------|---------|--------|-------|----|-------------|---------|--------|-------|----|-------------------------------|------------------------------------|-------------|-------|
|            |            | Mean          | SD      | SEM    | %CV   | N  | Mean        | SD      | SEM    | %CV   | N  |                               |                                    |             |       |
| 151        | PC_O-42-0  | 1.03          | 0.24    | 0.08   | 23.60 | 10 | 0.97        | 0.22    | 0.07   | 23.02 | 10 | 0.5875                        | Naïve                              |             | PC    |
| 152        | PC_O-42-1  | 0.51          | 0.14    | 0.05   | 28.15 | 10 | 0.54        | 0.12    | 0.04   | 21.93 | 10 | 0.6051                        | TBI                                |             | PC    |
| 153        | PC_O-42-2  | 0.39          | 0.13    | 0.04   | 32.79 | 10 | 0.38        | 0.12    | 0.04   | 30.83 | 10 | 0.8216                        | Naïve                              |             | PC    |
| 154        | PC_O-42-3  | 1.00          | 0.39    | 0.12   | 39.12 | 10 | 1.07        | 0.34    | 0.11   | 31.41 | 10 | 0.6919                        | TBI                                |             | PC    |
| 155        | PC_O-42-4  | 0.24          | 0.07    | 0.02   | 27.66 | 10 | 0.20        | 0.05    | 0.02   | 24.18 | 10 | 0.1321                        | Naïve                              |             | PC    |
| 156        | PC_O-42-5  | 0.58          | 0.09    | 0.03   | 14.72 | 10 | 0.57        | 0.07    | 0.02   | 13.17 | 10 | 0.6933                        | Naïve                              |             | PC    |
| 157        | PC_O-44-3  | 0.13          | 0.02    | 0.01   | 14.91 | 10 | 0.14        | 0.01    | 0.00   | 8.06  | 10 | 0.2690                        | TBI                                |             | PC    |
| 158        | PC_O-44-4  | 0.14          | 0.03    | 0.01   | 21.90 | 10 | 0.13        | 0.02    | 0.01   | 14.39 | 10 | 0.4145                        | Naïve                              |             | PC    |
| 159        | PC_O-44-5  | 0.24          | 0.05    | 0.02   | 21.93 | 10 | 0.24        | 0.03    | 0.01   | 14.14 | 10 | 0.9744                        | TBI                                |             | PC    |
| 160        | PC_O-44-6  | 0.18          | 0.04    | 0.01   | 24.84 | 10 | 0.17        | 0.03    | 0.01   | 16.91 | 10 | 0.5068                        | Naïve                              |             | PC    |
| 161        | SM_32-2 OH | 1.22          | 0.21    | 0.07   | 17.09 | 10 | 1.28        | 0.18    | 0.06   | 13.89 | 10 | 0.4353                        | TBI                                |             | SM    |
| 162        | SM_34-2 OH | 0.31          | 0.04    | 0.01   | 13.96 | 10 | 0.34        | 0.03    | 0.01   | 8.77  | 10 | 0.0976                        | TBI                                |             | SM    |
| 163        | SM_40-2 OH | 1.70          | 0.32    | 0.10   | 18.94 | 10 | 1.77        | 0.16    | 0.05   | 9.01  | 10 | 0.5200                        | TBI                                |             | SM    |
| 164        | SM_40-3 OH | 1.21          | 0.31    | 0.10   | 25.73 | 10 | 1.17        | 0.17    | 0.05   | 14.67 | 10 | 0.7042                        | Naïve                              |             | SM    |
| 165        | SM_42-2 OH | 0.21          | 0.05    | 0.02   | 25.28 | 10 | 0.22        | 0.03    | 0.01   | 12.34 | 10 | 0.4468                        | TBI                                |             | SM    |
| 166        | SM_34-1    | 17.47         | 2.83    | 0.89   | 16.19 | 10 | 19.76       | 1.28    | 0.41   | 6.50  | 10 | 0.0320                        | TBI                                |             | SM    |
| 167        | SM_34-2    | 2.78          | 0.83    | 0.26   | 29.94 | 10 | 3.05        | 0.53    | 0.17   | 17.46 | 10 | 0.4036                        | TBI                                |             | SM    |
| 168        | SM_36-1    | 1.91          | 0.39    | 0.12   | 20.31 | 10 | 2.32        | 0.44    | 0.14   | 19.13 | 10 | 0.0424                        | TBI                                |             | SM    |
| 169        | SM_36-2    | 0.77          | 0.10    | 0.03   | 13.65 | 10 | 0.91        | 0.07    | 0.02   | 7.68  | 10 | 0.0020                        | TBI                                |             | SM    |
| 170        | SM_38-3    | 0.08          | 0.02    | 0.01   | 27.96 | 10 | 0.08        | 0.02    | 0.01   | 25.27 | 10 | 0.9303                        | Naïve                              |             | SM    |
| 171        | SM_40-1    | 0.27          | 0.17    | 0.05   | 61.86 | 10 | 0.22        | 0.14    | 0.04   | 60.94 | 10 | 0.5237                        | Naïve                              |             | SM    |
| 172        | SM_42-1    | 5.15          | 1.63    | 0.52   | 31.68 | 10 | 4.70        | 1.57    | 0.50   | 33.41 | 10 | 0.5376                        | Naïve                              |             | SM    |
| 173        | SM_42-2    | 10.05         | 2.13    | 0.67   | 21.15 | 10 | 11.18       | 1.66    | 0.53   | 14.86 | 10 | 0.2009                        | TBI                                |             | SM    |
| 174        | SM_44-1    | 0.03          | 0.01    | 0.00   | 45.16 | 10 | 0.03        | 0.02    | 0.01   | 53.19 | 10 | 0.7004                        | TBI                                |             | SM    |
| 175        | H1         | 10731.33      | 1361.13 | 430.43 | 12.68 | 10 | 12070.51    | 2065.34 | 653.12 | 17.11 | 10 | 0.1041                        | TBI                                |             | S     |

**Supplemental Table 1.** (continued)

| Metabolite                | Naïve F and M |        |        |       |    | TBI_F and M |        |        |       |    | p value<br>Naïve<br>vs TBI | Differential<br>Expression<br>(up) | *<br>FDR<br><5% | Class |
|---------------------------|---------------|--------|--------|-------|----|-------------|--------|--------|-------|----|----------------------------|------------------------------------|-----------------|-------|
|                           | Mean          | SD     | SEM    | %CV   | N  | Mean        | SD     | SEM    | %CV   | N  |                            |                                    |                 |       |
| 176 C2,C3 / C0            | 0.73          | 0.12   | 0.04   | 16.85 | 10 | 0.73        | 0.11   | 0.03   | 15.14 | 10 | 0.9708                     | TBI                                |                 | AC    |
| 177 AAA                   | 258.88        | 40.51  | 12.81  | 15.65 | 10 | 292.53      | 62.30  | 19.70  | 21.30 | 10 | 0.1693                     | TBI                                |                 | BA    |
| 178 ADMA / Arg            | 0.01          | 0.00   | 0.00   | 32.78 | 10 | 0.01        | 0.00   | 0.00   | 18.52 | 10 | 0.5714                     | Naïve                              |                 | BA/AA |
| 179 BCAA                  | 623.85        | 122.13 | 38.62  | 19.58 | 10 | 662.97      | 158.54 | 50.14  | 23.91 | 10 | 0.5442                     | TBI                                |                 | AA    |
| 180 C2 / C0               | 0.71          | 0.12   | 0.04   | 17.10 | 10 | 0.70        | 0.11   | 0.04   | 15.76 | 10 | 0.9940                     | Naïve                              |                 | AC    |
| 181 Cit / Arg             | 0.69          | 0.14   | 0.04   | 19.89 | 10 | 0.39        | 0.11   | 0.03   | 28.05 | 10 | 0.0000                     | Naïve                              | *               | AA    |
| 182 Cit / Orn             | 1.27          | 0.41   | 0.13   | 32.14 | 10 | 0.63        | 0.22   | 0.07   | 34.77 | 10 | 0.0003                     | Naïve                              | *               | AA    |
| 183 CPT-I ratio           | 0.02          | 0.00   | 0.00   | 19.13 | 10 | 0.02        | 0.00   | 0.00   | 18.16 | 10 | 0.2773                     | TBI                                |                 | AC    |
| 184 Essential AA          | 1410.45       | 269.27 | 85.15  | 19.09 | 10 | 1559.48     | 267.96 | 84.74  | 17.18 | 10 | 0.2307                     | TBI                                |                 | AA    |
| 185 Fisher ratio          | 2.41          | 0.31   | 0.10   | 12.88 | 10 | 2.27        | 0.27   | 0.08   | 11.78 | 10 | 0.2929                     | Naïve                              |                 | AA    |
| 186 Glucogenic AA         | 1136.90       | 223.27 | 70.60  | 19.64 | 10 | 1305.10     | 325.01 | 102.78 | 24.90 | 10 | 0.1941                     | TBI                                |                 | AA    |
| 187 Kynurenine / Trp      | 0.01          | 0.00   | 0.00   | 20.78 | 10 | 0.01        | 0.00   | 0.00   | 20.91 | 10 | 0.8311                     | Naïve                              |                 | AA    |
| 188 Met-SO / Met          | 0.03          | 0.01   | 0.00   | 20.17 | 10 | 0.03        | 0.00   | 0.00   | 16.21 | 10 | 0.6371                     | Naïve                              |                 | AA    |
| 189 MUFA_PC               | 117.03        | 34.89  | 11.03  | 29.81 | 10 | 105.98      | 27.63  | 8.74   | 26.07 | 10 | 0.4428                     | Naïve                              |                 | PC    |
| 190 MUFA_PC / SFA_PC      | 5.38          | 0.60   | 0.19   | 11.20 | 10 | 4.55        | 0.58   | 0.18   | 12.68 | 10 | 0.0059                     | Naïve                              |                 | PC    |
| 191 Non essential AA      | 2221.46       | 278.37 | 88.03  | 12.53 | 10 | 2468.85     | 461.27 | 145.87 | 18.68 | 10 | 0.1637                     | TBI                                |                 | AA    |
| 192 Orn / Arg             | 0.57          | 0.12   | 0.04   | 20.92 | 10 | 0.65        | 0.13   | 0.04   | 20.07 | 10 | 0.1910                     | TBI                                |                 | AA    |
| 193 PUFA_PC               | 1149.94       | 253.68 | 80.22  | 22.06 | 10 | 1168.93     | 206.39 | 65.27  | 17.66 | 10 | 0.8564                     | TBI                                |                 | PC    |
| 194 PUFA_PC / MUFA_PC     | 10.11         | 1.31   | 0.41   | 12.91 | 10 | 11.28       | 1.32   | 0.42   | 11.69 | 10 | 0.0608                     | TBI                                |                 | PC    |
| 195 PUFA_PC / SFA_PC      | 53.73         | 3.54   | 1.12   | 6.59  | 10 | 50.86       | 4.34   | 1.37   | 8.54  | 10 | 0.1231                     | Naïve                              |                 | PC    |
| 196 SFA_PC                | 21.54         | 5.27   | 1.67   | 24.48 | 10 | 23.04       | 3.90   | 1.23   | 16.93 | 10 | 0.4780                     | TBI                                |                 | PC    |
| 197 Spermine / Spermidine | 0.43          | 0.08   | 0.03   | 18.79 | 10 | 0.64        | 0.16   | 0.05   | 24.29 | 10 | 0.0012                     | TBI                                |                 | BA    |
| 198 Total_PC,SM           | 1331.41       | 298.51 | 94.40  | 22.42 | 10 | 1344.78     | 239.63 | 75.78  | 17.82 | 10 | 0.9133                     | TBI                                |                 | PC,SM |
| 199 Total AA              | 3870.39       | 564.23 | 178.42 | 14.58 | 10 | 4218.38     | 731.91 | 231.45 | 17.35 | 10 | 0.2492                     | TBI                                |                 | AA    |
| 200 Total AC / C0         | 1.01          | 0.17   | 0.05   | 16.90 | 10 | 1.06        | 0.10   | 0.03   | 9.74  | 10 | 0.4496                     | TBI                                |                 | AC    |

**Supplemental Table 1.** (continued)

| Metabolite |                                  | Naïve F and M |        |       |         |    | TBI_F and M |        |       |         |    | p value<br>Naïve vs<br>TBI | Differential<br>Expression<br>(up) | *<br>FDR<br><5% | Class  |
|------------|----------------------------------|---------------|--------|-------|---------|----|-------------|--------|-------|---------|----|----------------------------|------------------------------------|-----------------|--------|
|            |                                  | Mean          | SD     | SEM   | %C<br>V | N  | Mean        | SD     | SEM   | %C<br>V | N  |                            |                                    |                 |        |
| 201        | Total AC-DC / Total AC           | 0.06          | 0.02   | 0.01  | 28.80   | 10 | 0.08        | 0.02   | 0.01  | 30.20   | 10 | 0.2530                     | TBI                                |                 | AC     |
| 202        | Total AC-OH / Total AC           | 0.04          | 0.01   | 0.00  | 22.71   | 10 | 0.04        | 0.01   | 0.00  | 24.57   | 10 | 0.2886                     | TBI                                |                 | AC     |
| 203        | Total LPC                        | 400.44        | 69.81  | 22.07 | 17.43   | 10 | 390.80      | 52.46  | 16.59 | 13.42   | 10 | 0.7309                     | Naïve                              |                 | LPC    |
| 204        | Total LPC / Total PC             | 0.32          | 0.04   | 0.01  | 12.17   | 10 | 0.30        | 0.03   | 0.01  | 11.13   | 10 | 0.5092                     | Naïve                              |                 | LPC,PC |
| 205        | Total PC                         | 1288.50       | 291.91 | 92.31 | 22.65   | 10 | 1297.95     | 235.99 | 74.63 | 18.18   | 10 | 0.9375                     | TBI                                |                 | PC     |
| 206        | Total PC_diacyl                  | 1226.28       | 272.96 | 86.32 | 22.26   | 10 | 1238.95     | 222.01 | 70.21 | 17.92   | 10 | 0.9106                     | TBI                                |                 | PC     |
| 207        | Total PC_ether                   | 62.22         | 19.24  | 6.08  | 30.92   | 10 | 59.00       | 14.29  | 4.52  | 24.22   | 10 | 0.6754                     | Naïve                              |                 | PC     |
| 208        | Total SM                         | 42.91         | 7.65   | 2.42  | 17.83   | 10 | 46.83       | 4.50   | 1.42  | 9.61    | 10 | 0.1792                     | TBI                                |                 | SM     |
| 209        | Total SM / Total_SM,PC           | 0.03          | 0.00   | 0.00  | 13.27   | 10 | 0.04        | 0.00   | 0.00  | 11.91   | 10 | 0.1815                     | TBI                                |                 | SM,PC  |
| 210        | Total SM / Total PC              | 0.03          | 0.00   | 0.00  | 13.77   | 10 | 0.04        | 0.00   | 0.00  | 12.37   | 10 | 0.1829                     | TBI                                |                 | SM/PC  |
| 211        | Total SM-non OH                  | 38.27         | 7.08   | 2.24  | 18.49   | 10 | 42.05       | 4.25   | 1.34  | 10.10   | 10 | 0.1647                     | TBI                                |                 | SM     |
| 212        | Total SM-OH                      | 4.64          | 0.81   | 0.26  | 17.46   | 10 | 4.78        | 0.43   | 0.13  | 8.89    | 10 | 0.6257                     | TBI                                |                 | SM     |
| 213        | Total SM-OH / Total<br>SM-non OH | 0.12          | 0.02   | 0.01  | 14.86   | 10 | 0.11        | 0.01   | 0.00  | 8.82    | 10 | 0.2226                     | Naïve                              |                 | SM     |
| 214        | Tyr / Phe                        | 1.16          | 0.14   | 0.05  | 12.38   | 10 | 1.24        | 0.20   | 0.06  | 16.37   | 10 | 0.3027                     | TBI                                |                 | AA     |

**Supplemental Table 2. Basal differences in plasma metabolites between naïve female and male C57BL/6 mice.**

Metabolites assayed from 3 mo. old C57BL/6 mice; n=5 for each cohort of female and male.

|    |                                 | Female_Naive |       |       |       |   | Male_Naive |       |       |       |   | P value<br>F vs. M | Differential<br>Expression<br>(up) | *<br>FDR<br><5% | Class |
|----|---------------------------------|--------------|-------|-------|-------|---|------------|-------|-------|-------|---|--------------------|------------------------------------|-----------------|-------|
|    | Metabolite                      | Mean         | SD    | SEM   | %CV   | N | mean       | SD    | SEM   | %CV   | N |                    |                                    |                 |       |
| 1  | PC_40-2                         | 0.21         | 0.01  | 0.02  | 4.27  | 5 | 0.47       | 0.04  | 0.00  | 9.19  | 5 | <0.0001            | Male                               | *               | PC    |
| 2  | PC_42-6                         | 0.38         | 0.05  | 0.05  | 11.89 | 5 | 1.01       | 0.10  | 0.02  | 10.16 | 5 | <0.0001            | Male                               | *               | PC    |
| 3  | PC_40-3                         | 0.21         | 0.04  | 0.03  | 16.79 | 5 | 0.64       | 0.07  | 0.02  | 10.75 | 5 | <0.0001            | Male                               | *               | PC    |
| 4  | SM_42-1                         | 3.66         | 0.50  | 0.21  | 13.73 | 5 | 6.63       | 0.46  | 0.22  | 6.98  | 5 | <0.0001            | Male                               | *               | SM    |
| 5  | PC_40-4                         | 1.12         | 0.13  | 0.18  | 11.71 | 5 | 2.73       | 0.41  | 0.06  | 14.91 | 5 | <0.0001            | Male                               | *               | PC    |
| 6  | PC_O-32-2                       | 0.14         | 0.02  | 0.02  | 14.61 | 5 | 0.29       | 0.04  | 0.01  | 12.99 | 5 | 0.0001             | Male                               | *               | PC    |
| 7  | PC_42-5                         | 0.18         | 0.02  | 0.02  | 8.92  | 5 | 0.34       | 0.05  | 0.01  | 13.43 | 5 | 0.0001             | Male                               | *               | PC    |
| 8  | PC_O-42-0                       | 0.82         | 0.06  | 0.06  | 6.84  | 5 | 1.25       | 0.12  | 0.03  | 9.89  | 5 | 0.0001             | Male                               | *               | PC    |
| 9  | PC_O-34-2                       | 2.76         | 0.31  | 0.27  | 11.36 | 5 | 4.88       | 0.60  | 0.14  | 12.36 | 5 | 0.0001             | Male                               | *               | PC    |
| 10 | PC_34-1                         | 60.31        | 10.47 | 4.77  | 17.36 | 5 | 105.66     | 10.65 | 4.68  | 10.08 | 5 | 0.0001             | Male                               | *               | PC    |
| 11 | PC_O-34-3                       | 0.80         | 0.13  | 0.08  | 16.26 | 5 | 1.46       | 0.18  | 0.06  | 12.58 | 5 | 0.0002             | Male                               | *               | PC    |
| 12 | PC_42-2                         | 0.16         | 0.01  | 0.01  | 8.96  | 5 | 0.25       | 0.03  | 0.01  | 11.34 | 5 | 0.0002             | Male                               | *               | PC    |
| 13 | PC_34-3                         | 9.33         | 1.08  | 1.30  | 11.58 | 5 | 17.79      | 2.90  | 0.48  | 16.30 | 5 | 0.0003             | Male                               | *               | PC    |
| 14 | PC_42-4                         | 0.14         | 0.02  | 0.02  | 13.31 | 5 | 0.25       | 0.04  | 0.01  | 14.80 | 5 | 0.0004             | Male                               | *               | PC    |
| 15 | MUFA_PC                         | 87.31        | 15.74 | 7.51  | 18.03 | 5 | 146.75     | 16.80 | 7.04  | 11.45 | 5 | 0.0004             | Male                               | *               | PC    |
| 16 | PC_O-38-2                       | 3.61         | 0.56  | 0.74  | 15.45 | 5 | 8.08       | 1.66  | 0.25  | 20.51 | 5 | 0.0005             | Male                               | *               | PC    |
| 17 | Total SM-OH/<br>Total SM-non OH | 0.14         | 0.01  | 0.00  | 5.73  | 5 | 0.11       | 0.01  | 0.00  | 8.98  | 5 | 0.0006             | Female                             | *               | SM    |
| 18 | PC_O-36-3                       | 1.57         | 0.19  | 0.18  | 11.82 | 5 | 2.65       | 0.41  | 0.08  | 15.53 | 5 | 0.0007             | Male                               | *               | PC    |
| 19 | PC_40-5                         | 2.61         | 0.41  | 0.30  | 15.72 | 5 | 4.43       | 0.66  | 0.18  | 14.97 | 5 | 0.0008             | Male                               | *               | PC    |
| 20 | PC_34-2                         | 286.15       | 31.65 | 13.82 | 11.06 | 5 | 388.82     | 30.91 | 14.15 | 7.95  | 5 | 0.0008             | Male                               | *               | PC    |
| 21 | PC_42-0                         | 0.18         | 0.01  | 0.01  | 7.22  | 5 | 0.24       | 0.03  | 0.01  | 10.64 | 5 | 0.0013             | Male                               | *               | PC    |
| 22 | PC_O-32-1                       | 0.40         | 0.08  | 0.03  | 19.85 | 5 | 0.63       | 0.08  | 0.04  | 12.15 | 5 | 0.0014             | Male                               | *               | PC    |
| 23 | PC_O-36-4                       | 2.51         | 0.29  | 0.40  | 11.75 | 5 | 4.45       | 0.89  | 0.13  | 19.98 | 5 | 0.0017             | Male                               | *               | PC    |
| 24 | PC_40-1                         | 0.28         | 0.02  | 0.02  | 6.95  | 5 | 0.37       | 0.04  | 0.01  | 11.19 | 5 | 0.0022             | Male                               | *               | PC    |
| 25 | PC_O-34-1                       | 1.98         | 0.20  | 0.25  | 9.84  | 5 | 3.17       | 0.57  | 0.09  | 17.93 | 5 | 0.0022             | Male                               | *               | PC    |

**Supplemental Table 2.** (continued)

|    |                 | Female_Naive |        |       |       |   | Male_Naive |        |       |       |   | P value<br>F vs. M | Differential<br>Expression<br>(up) | *<br>FDR<br><5% | Class  |
|----|-----------------|--------------|--------|-------|-------|---|------------|--------|-------|-------|---|--------------------|------------------------------------|-----------------|--------|
|    | Metabolite      | Mean         | SD     | SEM   | %CV   | N | mean       | SD     | SEM   | %CV   | N |                    |                                    |                 |        |
| 26 | LPC_26-0        | 0.17         | 0.01   | 0.00  | 3.05  | 5 | 0.24       | 0.03   | 0.02  | 14.42 | 5 | 0.0027             | Male                               | *               | LPC    |
| 27 | Total_PC_ether  | 47.10        | 5.08   | 2.27  | 10.78 | 5 | 77.35      | 15.34  | 6.86  | 19.83 | 5 | 0.0031             | Male                               | *               | PC     |
| 28 | Total PC        | 1060.60      | 126.90 | 56.75 | 11.96 | 5 | 1516.40    | 213.96 | 95.68 | 14.11 | 5 | 0.0035             | Male                               | *               | PC     |
| 29 | PC_32-1         | 2.52         | 0.61   | 0.27  | 24.01 | 5 | 4.45       | 0.86   | 0.39  | 19.35 | 5 | 0.0035             | Male                               | *               | PC     |
| 30 | Total_PC_diacyl | 1013.50      | 122.10 | 54.60 | 12.05 | 5 | 1439.06    | 198.87 | 88.94 | 13.82 | 5 | 0.0035             | Male                               | *               | PC     |
| 31 | LPC_16-0        | 122.14       | 8.71   | 3.89  | 7.13  | 5 | 170.65     | 25.14  | 11.24 | 14.73 | 5 | 0.0035             | Male                               | *               | LPC    |
| 32 | Total_PC,SM     | 1098.80      | 128.16 | 57.31 | 11.66 | 5 | 1564.02    | 220.92 | 98.80 | 14.13 | 5 | 0.0036             | Male                               | *               | PC, SM |
| 33 | PC_O-40-2       | 0.53         | 0.04   | 0.02  | 7.55  | 5 | 0.80       | 0.14   | 0.06  | 18.00 | 5 | 0.0036             | Male                               | *               | PC     |
| 34 | PC_O-38-6       | 1.62         | 0.19   | 0.09  | 11.92 | 5 | 2.87       | 0.67   | 0.30  | 23.28 | 5 | 0.0038             | Male                               | *               | PC     |
| 35 | PC_38-6         | 81.05        | 8.55   | 3.82  | 10.55 | 5 | 133.00     | 28.12  | 12.58 | 21.15 | 5 | 0.0042             | Male                               | *               | PC     |
| 36 | SM_44-1         | 0.04         | 0.01   | 0.01  | 28.11 | 5 | 0.02       | 0.00   | 0.00  | 17.71 | 5 | 0.0043             | Female                             | *               | SM     |
| 37 | PC_36-4         | 106.93       | 13.93  | 6.23  | 13.03 | 5 | 168.46     | 32.06  | 14.34 | 19.03 | 5 | 0.0043             | Male                               | *               | PC     |
| 38 | PC_38-3         | 17.46        | 3.08   | 1.38  | 17.65 | 5 | 27.56      | 4.89   | 2.19  | 17.74 | 5 | 0.0045             | Male                               | *               | PC     |
| 39 | PUFA_PC         | 955.73       | 111.17 | 49.72 | 11.63 | 5 | 1344.15    | 195.30 | 87.34 | 14.53 | 5 | 0.0048             | Male                               | *               | PC     |
| 40 | PC_O-44-5       | 0.20         | 0.02   | 0.01  | 8.66  | 5 | 0.28       | 0.04   | 0.02  | 15.54 | 5 | 0.0049             | Male                               | *               | PC     |
| 41 | PC_O-40-1       | 2.07         | 0.22   | 0.10  | 10.57 | 5 | 3.98       | 1.09   | 0.49  | 27.37 | 5 | 0.0050             | Male                               | *               | PC     |
| 42 | PC_O-42-3       | 0.70         | 0.06   | 0.03  | 8.99  | 5 | 1.30       | 0.34   | 0.15  | 26.37 | 5 | 0.0050             | Male                               | *               | PC     |
| 43 | PC_O-38-1       | 0.52         | 0.12   | 0.05  | 22.02 | 5 | 0.85       | 0.15   | 0.07  | 18.15 | 5 | 0.0051             | Male                               | *               | PC     |
| 44 | PC_O-40-4       | 1.17         | 0.13   | 0.06  | 10.76 | 5 | 2.09       | 0.53   | 0.24  | 25.35 | 5 | 0.0053             | Male                               | *               | PC     |
| 45 | PC_36-3         | 70.13        | 10.66  | 4.77  | 15.20 | 5 | 105.87     | 18.32  | 8.19  | 17.31 | 5 | 0.0055             | Male                               | *               | PC     |
| 46 | PC_O-30-0       | 0.11         | 0.02   | 0.01  | 15.43 | 5 | 0.15       | 0.01   | 0.01  | 9.09  | 5 | 0.0057             | Male                               | *               | PC     |
| 47 | PC_O-36-1       | 1.64         | 0.24   | 0.11  | 14.74 | 5 | 2.31       | 0.32   | 0.14  | 13.95 | 5 | 0.0059             | Male                               | *               | PC     |
| 48 | SM_34-2         | 2.15         | 0.18   | 0.08  | 8.24  | 5 | 3.41       | 0.74   | 0.33  | 21.58 | 5 | 0.0059             | Male                               | *               | SM     |
| 49 | PC_O-42-2       | 0.29         | 0.02   | 0.01  | 8.15  | 5 | 0.48       | 0.11   | 0.05  | 23.44 | 5 | 0.0060             | Male                               | *               | PC     |
| 50 | PC_O-40-3       | 0.44         | 0.05   | 0.02  | 10.52 | 5 | 0.71       | 0.16   | 0.07  | 22.51 | 5 | 0.0061             | Male                               | *               | PC     |

**Supplemental Table 2.** (continued)

|            |                     | Female_Naive |      |      |       |   | Male_Naive |      |      |       |   | P value<br>F vs. M | Differential<br>Expression<br>(up) | *<br>FDR<br><5% | Class |
|------------|---------------------|--------------|------|------|-------|---|------------|------|------|-------|---|--------------------|------------------------------------|-----------------|-------|
| Metabolite |                     | Mean         | SD   | SEM  | %CV   | N | mean       | SD   | SEM  | %CV   | N |                    |                                    |                 |       |
| 51         | SFA_PC              | 17.57        | 2.25 | 1.01 | 12.79 | 5 | 25.51      | 4.26 | 1.90 | 16.69 | 5 | 0.0062             | Female                             | *               | PC    |
| 52         | PC_O-36-2           | 7.80         | 1.10 | 0.49 | 14.05 | 5 | 11.78      | 2.22 | 0.99 | 18.85 | 5 | 0.0070             | Female                             | *               | PC    |
| 53         | PC_32-0             | 9.67         | 1.47 | 0.66 | 15.24 | 5 | 13.96      | 2.24 | 1.00 | 16.03 | 5 | 0.0071             | Female                             | *               | PC    |
| 54         | PC_O-30-2           | 0.05         | 0.00 | 0.00 | 9.52  | 5 | 0.07       | 0.01 | 0.00 | 16.74 | 5 | 0.0073             | Female                             | *               | PC    |
| 55         | LPC_28-1            | 0.15         | 0.01 | 0.01 | 8.48  | 5 | 0.21       | 0.04 | 0.02 | 17.55 | 5 | 0.0079             | Female                             | *               | LPC   |
| 56         | PC_34-4             | 0.39         | 0.04 | 0.02 | 11.20 | 5 | 0.66       | 0.18 | 0.08 | 26.51 | 5 | 0.0089             | Female                             | *               | PC    |
| 57         | PUFA_PC/<br>MUFA_PC | 11.06        | 1.04 | 0.46 | 9.38  | 5 | 9.15       | 0.69 | 0.31 | 7.57  | 5 | 0.0091             | Male                               | *               | PC    |
| 58         | LPC_26-1            | 0.08         | 0.01 | 0.01 | 14.52 | 5 | 0.12       | 0.02 | 0.01 | 18.06 | 5 | 0.0107             | Female                             | *               | LPC   |
| 59         | PC_36-5             | 5.57         | 0.88 | 0.40 | 15.89 | 5 | 9.26       | 2.34 | 1.04 | 25.23 | 5 | 0.0108             | Female                             | *               | PC    |
| 60         | PC_O-42-1           | 0.41         | 0.07 | 0.03 | 16.29 | 5 | 0.61       | 0.12 | 0.05 | 20.09 | 5 | 0.0108             | Female                             | *               | PC    |
| 61         | PC_O-44-4           | 0.12         | 0.01 | 0.00 | 5.70  | 5 | 0.16       | 0.03 | 0.01 | 17.95 | 5 | 0.0108             | Female                             | *               | PC    |
| 62         | PC_O-38-0           | 1.65         | 0.18 | 0.08 | 10.97 | 5 | 3.12       | 0.98 | 0.44 | 31.44 | 5 | 0.0109             | Female                             | *               | PC    |
| 63         | PC_O-42-5           | 0.52         | 0.02 | 0.01 | 4.78  | 5 | 0.64       | 0.08 | 0.04 | 12.53 | 5 | 0.0117             | Female                             | *               | PC    |
| 64         | PC_O-30-1           | 0.09         | 0.02 | 0.01 | 24.79 | 5 | 0.15       | 0.03 | 0.01 | 22.16 | 5 | 0.0125             | Female                             | *               | PC    |
| 65         | PC_32-2             | 0.94         | 0.11 | 0.05 | 11.86 | 5 | 1.37       | 0.28 | 0.13 | 20.49 | 5 | 0.0126             | Female                             | *               | PC    |
| 66         | PC_O-44-6           | 0.15         | 0.02 | 0.01 | 16.69 | 5 | 0.21       | 0.04 | 0.02 | 17.41 | 5 | 0.0126             | Female                             | *               | PC    |
| 67         | PC_36-1             | 16.73        | 3.95 | 1.77 | 23.61 | 5 | 24.16      | 3.55 | 1.59 | 14.70 | 5 | 0.0141             | Female                             | *               | PC    |
| 68         | PC_38-0             | 1.23         | 0.14 | 0.06 | 11.74 | 5 | 1.84       | 0.42 | 0.19 | 23.00 | 5 | 0.0152             | Female                             | *               | PC    |
| 69         | MUFA_PC/<br>SFA_PC  | 4.96         | 0.48 | 0.22 | 9.78  | 5 | 5.80       | 0.37 | 0.17 | 6.44  | 5 | 0.0154             | Female                             | *               | PC    |
| 70         | PC_32-3             | 0.14         | 0.03 | 0.01 | 20.96 | 5 | 0.20       | 0.03 | 0.01 | 15.12 | 5 | 0.0161             | Female                             | *               | PC    |
| 71         | PC_O-38-5           | 2.36         | 0.25 | 0.11 | 10.53 | 5 | 3.72       | 0.97 | 0.44 | 26.16 | 5 | 0.0165             | Female                             | *               | PC    |
| 72         | PC_42-1             | 0.13         | 0.02 | 0.01 | 12.16 | 5 | 0.16       | 0.02 | 0.01 | 12.46 | 5 | 0.0186             | Female                             |                 | PC    |
| 73         | LPC_24-0            | 0.32         | 0.03 | 0.02 | 10.66 | 5 | 0.47       | 0.11 | 0.05 | 22.61 | 5 | 0.0186             | Female                             |                 | LPC   |
| 74         | PC_O-40-5           | 0.77         | 0.09 | 0.04 | 11.40 | 5 | 1.10       | 0.24 | 0.11 | 21.52 | 5 | 0.0194             | Female                             |                 | PC    |
| 75         | PC_O-38-3           | 1.40         | 0.21 | 0.09 | 14.73 | 5 | 2.08       | 0.48 | 0.22 | 23.15 | 5 | 0.0195             | Female                             |                 | PC    |

**Supplemental Table 2.** (continued)

|    | Metabolite              | Female_Naive |       |       |       |   | Male_Naive |       |       |       |   | P value<br>F vs. M | Differential<br>Expression<br>(up) | *<br>FDR<br><5% | Class   |
|----|-------------------------|--------------|-------|-------|-------|---|------------|-------|-------|-------|---|--------------------|------------------------------------|-----------------|---------|
|    |                         | Mean         | SD    | SEM   | %CV   | N | mean       | SD    | SEM   | %CV   | N |                    |                                    |                 |         |
| 76 | PC_36-2                 | 196.68       | 29.26 | 13.09 | 14.88 | 5 | 249.21     | 27.87 | 12.47 | 11.18 | 5 | 0.0197             | Female                             |                 | PC      |
| 77 | LPC_20-3                | 4.22         | 0.53  | 0.24  | 12.50 | 5 | 6.43       | 1.67  | 0.75  | 25.99 | 5 | 0.0225             | Female                             |                 | LPC     |
| 78 | Total SM-non OH         | 33.56        | 4.36  | 1.95  | 13.00 | 5 | 42.98      | 6.18  | 2.76  | 14.37 | 5 | 0.0238             | Female                             |                 | SM      |
| 79 | LPC_16-1                | 2.68         | 0.25  | 0.11  | 9.39  | 5 | 3.81       | 0.88  | 0.39  | 22.95 | 5 | 0.0238             | Female                             |                 | LPC     |
| 80 | LPC_28-0                | 0.22         | 0.05  | 0.02  | 21.26 | 5 | 0.29       | 0.03  | 0.01  | 9.83  | 5 | 0.0258             | Female                             |                 | LPC     |
| 81 | PC_O-44-3               | 0.12         | 0.01  | 0.00  | 5.64  | 5 | 0.14       | 0.02  | 0.01  | 14.00 | 5 | 0.0269             | Female                             |                 | PC      |
| 82 | PC_O-34-0               | 0.36         | 0.07  | 0.03  | 18.43 | 5 | 0.47       | 0.07  | 0.03  | 14.88 | 5 | 0.0270             | Female                             |                 | PC      |
| 83 | PC_38-5                 | 23.38        | 3.45  | 1.54  | 14.74 | 5 | 35.01      | 9.08  | 4.06  | 25.93 | 5 | 0.0280             | Female                             |                 | PC      |
| 84 | PC_36-6                 | 0.27         | 0.04  | 0.02  | 13.01 | 5 | 0.42       | 0.12  | 0.05  | 28.98 | 5 | 0.0302             | Female                             |                 | PC      |
| 85 | PC_O-36-0               | 0.37         | 0.05  | 0.02  | 13.99 | 5 | 0.49       | 0.09  | 0.04  | 19.18 | 5 | 0.0357             | Female                             |                 | PC      |
| 86 | PC_O-38-4               | 3.27         | 0.43  | 0.19  | 13.17 | 5 | 4.63       | 1.12  | 0.50  | 24.26 | 5 | 0.0360             | Female                             |                 | PC      |
| 87 | Total LPC / Total<br>PC | 0.34         | 0.04  | 0.02  | 10.91 | 5 | 0.29       | 0.02  | 0.01  | 7.51  | 5 | 0.0362             | Male                               |                 | LPC, PC |
| 88 | Total SM                | 38.20        | 5.05  | 2.26  | 13.23 | 5 | 47.62      | 7.12  | 3.18  | 14.94 | 5 | 0.0423             | Female                             |                 | SM      |
| 89 | Total LPC               | 357.48       | 21.28 | 9.52  | 5.95  | 5 | 443.41     | 76.78 | 34.34 | 17.32 | 5 | 0.0424             | Female                             |                 | LPC     |
| 90 | PC_O-42-4               | 0.20         | 0.03  | 0.01  | 13.89 | 5 | 0.28       | 0.07  | 0.03  | 25.23 | 5 | 0.0445             | Female                             |                 | PC      |
| 91 | SM_42-2                 | 8.76         | 1.83  | 0.82  | 20.92 | 5 | 11.33      | 1.63  | 0.73  | 14.43 | 5 | 0.0474             | Female                             |                 | SM      |
| 92 | PC_O-40-6               | 2.12         | 0.26  | 0.12  | 12.44 | 5 | 2.95       | 0.74  | 0.33  | 25.20 | 5 | 0.0474             | Female                             |                 | PC      |

**Supplemental Table 3. Plasma metabolites in naïve female and male C57BL/6 mice.**  
Metabolites assayed from 3 mo. old C57BL/6 mice; n=5 for each cohort of female and male.

|    | Metabolite  | Female_Naive |      |      |       |   | Male_Naive |      |      |       |   | P value<br>F vs. M | Differential<br>Expression<br>(up) | *<br>FDR<br><5% | Class |
|----|-------------|--------------|------|------|-------|---|------------|------|------|-------|---|--------------------|------------------------------------|-----------------|-------|
|    |             | mean         | SD   | SEM  | %CV   | N | mean       | SD   | SEM  | %CV   | N |                    |                                    |                 |       |
| 1  | C0          | 21.25        | 2.33 | 1.04 | 10.95 | 5 | 22.77      | 3.90 | 1.74 | 17.13 | 5 | 0.4762             | Male_Naive                         | AC              |       |
| 2  | C10         | 0.25         | 0.06 | 0.03 | 25.17 | 5 | 0.26       | 0.08 | 0.03 | 29.55 | 5 | 0.8528             | Male_Naive                         | AC              |       |
| 3  | C10-1       | 0.12         | 0.04 | 0.02 | 30.39 | 5 | 0.13       | 0.03 | 0.02 | 26.30 | 5 | 0.5356             | Male_Naive                         | AC              |       |
| 4  | C10-2       | 0.15         | 0.03 | 0.01 | 18.78 | 5 | 0.14       | 0.04 | 0.02 | 25.19 | 5 | 0.9086             | Female_Naive                       | AC              |       |
| 5  | C12         | 0.28         | 0.12 | 0.05 | 43.66 | 5 | 0.30       | 0.12 | 0.05 | 40.86 | 5 | 0.7705             | Male_Naive                         | AC              |       |
| 6  | C12-DC      | 0.45         | 0.04 | 0.02 | 9.07  | 5 | 0.48       | 0.05 | 0.02 | 11.10 | 5 | 0.3070             | Male_Naive                         | AC              |       |
| 7  | C12-1       | 0.26         | 0.05 | 0.02 | 19.21 | 5 | 0.30       | 0.04 | 0.02 | 13.58 | 5 | 0.2759             | Male_Naive                         | AC              |       |
| 8  | C14         | 0.15         | 0.05 | 0.02 | 32.33 | 5 | 0.16       | 0.05 | 0.02 | 32.41 | 5 | 0.8527             | Male_Naive                         | AC              |       |
| 9  | C14-1       | 0.07         | 0.02 | 0.01 | 28.94 | 5 | 0.07       | 0.02 | 0.01 | 32.46 | 5 | 0.8816             | Female_Naive                       | AC              |       |
| 10 | C14-1 OH    | 0.08         | 0.03 | 0.02 | 45.74 | 5 | 0.08       | 0.04 | 0.02 | 42.75 | 5 | 0.7740             | Male_Naive                         | AC              |       |
| 11 | C14-2       | 0.04         | 0.01 | 0.01 | 31.16 | 5 | 0.05       | 0.02 | 0.01 | 33.84 | 5 | 0.6452             | Male_Naive                         | AC              |       |
| 12 | C14-2 OH    | 0.10         | 0.03 | 0.01 | 27.57 | 5 | 0.10       | 0.03 | 0.01 | 27.53 | 5 | 0.9645             | Female_Naive                       | AC              |       |
| 13 | C16         | 0.24         | 0.04 | 0.02 | 15.22 | 5 | 0.24       | 0.06 | 0.03 | 25.96 | 5 | 0.8901             | Male_Naive                         | AC              |       |
| 14 | C16-OH      | 0.10         | 0.04 | 0.02 | 40.35 | 5 | 0.11       | 0.04 | 0.02 | 37.82 | 5 | 0.7692             | Male_Naive                         | AC              |       |
| 15 | C16-1       | 0.14         | 0.04 | 0.02 | 27.01 | 5 | 0.14       | 0.03 | 0.01 | 23.01 | 5 | 0.8419             | Female_Naive                       | AC              |       |
| 16 | C16-1 OH    | 0.08         | 0.04 | 0.02 | 47.25 | 5 | 0.09       | 0.04 | 0.02 | 44.19 | 5 | 0.8265             | Male_Naive                         | AC              |       |
| 17 | C16-2       | 0.05         | 0.01 | 0.01 | 26.34 | 5 | 0.05       | 0.02 | 0.01 | 30.51 | 5 | 0.9499             | Male_Naive                         | AC              |       |
| 18 | C16-2 OH    | 0.07         | 0.02 | 0.01 | 33.10 | 5 | 0.07       | 0.02 | 0.01 | 33.01 | 5 | 0.9564             | Male_Naive                         | AC              |       |
| 19 | C18         | 0.11         | 0.03 | 0.01 | 25.48 | 5 | 0.11       | 0.03 | 0.01 | 29.49 | 5 | 1.0000             | Male_Naive                         | AC              |       |
| 20 | C18-1       | 0.21         | 0.09 | 0.04 | 44.76 | 5 | 0.17       | 0.06 | 0.03 | 36.25 | 5 | 0.4345             | Female_Naive                       | AC              |       |
| 21 | C18-1 OH    | 0.07         | 0.02 | 0.01 | 34.84 | 5 | 0.07       | 0.02 | 0.01 | 31.45 | 5 | 0.8491             | Male_Naive                         | AC              |       |
| 22 | C18-2       | 0.09         | 0.02 | 0.01 | 21.16 | 5 | 0.08       | 0.03 | 0.01 | 32.61 | 5 | 0.7866             | Female_Naive                       | AC              |       |
| 23 | C2          | 16.01        | 1.50 | 0.67 | 9.39  | 5 | 14.79      | 3.43 | 1.53 | 23.20 | 5 | 0.4861             | Female_Naive                       | AC              |       |
| 24 | C3          | 0.47         | 0.14 | 0.06 | 29.40 | 5 | 0.48       | 0.11 | 0.05 | 23.42 | 5 | 0.9203             | Male_Naive                         | AC              |       |
| 25 | C3-DC_C4-OH | 0.21         | 0.07 | 0.03 | 30.76 | 5 | 0.23       | 0.08 | 0.04 | 35.40 | 5 | 0.7262             | Male_Naive                         | AC              |       |

Supplemental Table 3. (continued)

|    | Metabolite    | Female_Naive |        |       |       |   | Male_Naive |        |       |       |   | P value<br>F vs. M | Differential<br>Expression<br>(up) | *<br>FDR<br><5% | Class |
|----|---------------|--------------|--------|-------|-------|---|------------|--------|-------|-------|---|--------------------|------------------------------------|-----------------|-------|
|    |               | mean         | SD     | SEM   | %CV   | N | mean       | SD     | SEM   | %CV   | N |                    |                                    |                 |       |
| 26 | C3-OH         | 0.13         | 0.05   | 0.02  | 33.89 | 5 | 0.14       | 0.04   | 0.02  | 27.64 | 5 | 0.8040             | Male_Naive                         | AC              |       |
| 27 | C3-1          | 0.08         | 0.04   | 0.02  | 46.74 | 5 | 0.09       | 0.04   | 0.02  | 42.02 | 5 | 0.7605             | Male_Naive                         | AC              |       |
| 28 | C4            | 0.41         | 0.13   | 0.06  | 32.63 | 5 | 0.38       | 0.12   | 0.06  | 32.80 | 5 | 0.7342             | Female_Naive                       | AC              |       |
| 29 | C4-1          | 0.09         | 0.03   | 0.01  | 29.49 | 5 | 0.10       | 0.03   | 0.01  | 30.93 | 5 | 0.7784             | Male_Naive                         | AC              |       |
| 30 | C5            | 0.17         | 0.06   | 0.03  | 38.27 | 5 | 0.18       | 0.05   | 0.02  | 30.16 | 5 | 0.8764             | Male_Naive                         | AC              |       |
| 31 | C5-DC_C6-OH   | 0.24         | 0.13   | 0.06  | 55.34 | 5 | 0.26       | 0.13   | 0.06  | 50.47 | 5 | 0.8744             | Male_Naive                         | AC              |       |
| 32 | C5-M-DC       | 0.19         | 0.09   | 0.04  | 48.55 | 5 | 0.17       | 0.06   | 0.02  | 31.86 | 5 | 0.8026             | Female_Naive                       | AC              |       |
| 33 | C5-OH_C3-DC-M | 0.15         | 0.04   | 0.02  | 29.64 | 5 | 0.16       | 0.05   | 0.02  | 29.25 | 5 | 0.8341             | Male_Naive                         | AC              |       |
| 34 | C5-1          | 0.09         | 0.04   | 0.02  | 42.29 | 5 | 0.09       | 0.03   | 0.02  | 38.40 | 5 | 0.9376             | Male_Naive                         | AC              |       |
| 35 | C5-1 DC       | 0.48         | 0.29   | 0.13  | 61.14 | 5 | 0.51       | 0.29   | 0.13  | 58.11 | 5 | 0.8889             | Male_Naive                         | AC              |       |
| 36 | C6_C4-1 DC    | 0.21         | 0.11   | 0.05  | 52.50 | 5 | 0.22       | 0.11   | 0.05  | 50.52 | 5 | 0.9286             | Male_Naive                         | AC              |       |
| 37 | C6-1          | 0.14         | 0.07   | 0.03  | 52.54 | 5 | 0.14       | 0.07   | 0.03  | 49.95 | 5 | 0.9622             | Male_Naive                         | AC              |       |
| 38 | C7-DC         | 0.06         | 0.03   | 0.01  | 52.93 | 5 | 0.07       | 0.03   | 0.01  | 43.13 | 5 | 0.4698             | Male_Naive                         | AC              |       |
| 39 | C8            | 0.12         | 0.05   | 0.02  | 39.88 | 5 | 0.12       | 0.04   | 0.02  | 34.00 | 5 | 0.8872             | Male_Naive                         | AC              |       |
| 40 | C9            | 0.25         | 0.06   | 0.03  | 23.74 | 5 | 0.24       | 0.07   | 0.03  | 27.36 | 5 | 0.7553             | Female_Naive                       | AC              |       |
| 41 | Ala           | 773.20       | 188.96 | 84.51 | 24.44 | 5 | 665.40     | 122.14 | 54.62 | 18.36 | 5 | 0.3153             | Female_Naive                       | AA              |       |
| 42 | Arg           | 108.94       | 28.60  | 12.79 | 26.26 | 5 | 103.28     | 15.67  | 7.01  | 15.17 | 5 | 0.7081             | Female_Naive                       | AA              |       |
| 43 | Asn           | 69.16        | 21.77  | 9.74  | 31.48 | 5 | 59.22      | 17.70  | 7.92  | 29.89 | 5 | 0.4512             | Female_Naive                       | AA              |       |
| 44 | Asp           | 10.04        | 2.51   | 1.12  | 24.95 | 5 | 7.54       | 1.22   | 0.55  | 16.25 | 5 | 0.0793             | Female_Naive                       | AA              |       |
| 45 | Cit           | 77.36        | 17.77  | 7.95  | 22.97 | 5 | 65.38      | 3.41   | 1.52  | 5.21  | 5 | 0.1770             | Female_Naive                       | AA              |       |
| 46 | Gln           | 712.80       | 99.78  | 44.62 | 14.00 | 5 | 723.20     | 159.33 | 71.25 | 22.03 | 5 | 0.9046             | Male_Naive                         | AA              |       |
| 47 | Glu           | 41.52        | 14.87  | 6.65  | 35.82 | 5 | 44.88      | 8.67   | 3.88  | 19.33 | 5 | 0.6741             | Male_Naive                         | AA              |       |
| 48 | Gly           | 236.40       | 28.85  | 12.90 | 12.20 | 5 | 253.40     | 47.18  | 21.10 | 18.62 | 5 | 0.5113             | Male_Naive                         | AA              |       |
| 49 | Ile           | 126.80       | 20.24  | 9.05  | 15.96 | 5 | 126.10     | 17.93  | 8.02  | 14.22 | 5 | 0.9553             | Female_Naive                       | AA              |       |
| 50 | Leu           | 272.20       | 72.81  | 32.56 | 26.75 | 5 | 298.60     | 78.32  | 35.03 | 26.23 | 5 | 0.5960             | Male_Naive                         | AA              |       |

Supplemental Table 3. (continued)

|    |            | Female_Naive |        |       |       |   | Male_Naive |       |       |       |   | P value<br>F vs. M | Differential<br>Expression<br>(up) | *<br>FDR<br><5% | Class |
|----|------------|--------------|--------|-------|-------|---|------------|-------|-------|-------|---|--------------------|------------------------------------|-----------------|-------|
|    | Metabolite | mean         | SD     | SEM   | %CV   | N | mean       | SD    | SEM   | %CV   | N |                    |                                    |                 |       |
| 51 | Lys        | 319.00       | 84.41  | 37.75 | 26.46 | 5 | 338.00     | 70.16 | 31.38 | 20.76 | 5 | 0.7088             | Male_Naive                         |                 | AA    |
| 52 | Met        | 74.00        | 27.78  | 12.42 | 37.54 | 5 | 89.32      | 40.16 | 17.96 | 44.96 | 5 | 0.5028             | Male_Naive                         |                 | AA    |
| 53 | Orn        | 55.56        | 15.67  | 7.01  | 28.20 | 5 | 66.44      | 22.75 | 10.17 | 34.24 | 5 | 0.4042             | Male_Naive                         |                 | AA    |
| 54 | Phe        | 76.56        | 11.92  | 5.33  | 15.58 | 5 | 81.66      | 14.37 | 6.43  | 17.60 | 5 | 0.5584             | Male_Naive                         |                 | AA    |
| 55 | Pro        | 146.66       | 51.69  | 23.11 | 35.24 | 5 | 170.22     | 54.48 | 24.36 | 32.00 | 5 | 0.5029             | Male_Naive                         |                 | AA    |
| 56 | Ser        | 183.60       | 56.04  | 25.06 | 30.52 | 5 | 161.80     | 43.49 | 19.45 | 26.88 | 5 | 0.5114             | Female_Naive                       |                 | AA    |
| 57 | Thr        | 216.00       | 62.55  | 27.97 | 28.96 | 5 | 203.00     | 43.39 | 19.40 | 21.37 | 5 | 0.7125             | Female_Naive                       |                 | AA    |
| 58 | Trp        | 99.20        | 17.19  | 7.69  | 17.32 | 5 | 76.46      | 22.33 | 9.99  | 29.21 | 5 | 0.1088             | Female_Naive                       |                 | AA    |
| 59 | Tyr        | 94.24        | 24.63  | 11.02 | 26.14 | 5 | 89.64      | 13.77 | 6.16  | 15.36 | 5 | 0.7249             | Female_Naive                       |                 | AA    |
| 60 | Val        | 209.00       | 43.66  | 19.53 | 20.89 | 5 | 215.00     | 42.54 | 19.03 | 19.79 | 5 | 0.8313             | Male_Naive                         |                 | AA    |
| 61 | Ac-Orn     | 2.38         | 0.34   | 0.15  | 14.18 | 5 | 1.98       | 0.20  | 0.09  | 9.84  | 5 | 0.0527             | Female_Naive                       |                 | BA    |
| 62 | ADMA       | 0.74         | 0.20   | 0.09  | 26.80 | 5 | 0.72       | 0.05  | 0.02  | 7.11  | 5 | 0.8238             | Female_Naive                       |                 | BA    |
| 63 | alpha-AAA  | 11.38        | 4.13   | 1.85  | 36.32 | 5 | 9.54       | 1.62  | 0.72  | 16.94 | 5 | 0.3811             | Female_Naive                       |                 | BA    |
| 64 | Creatinine | 6.56         | 0.67   | 0.30  | 10.18 | 5 | 6.13       | 1.42  | 0.63  | 23.14 | 5 | 0.5585             | Female_Naive                       |                 | BA    |
| 65 | Kynurenine | 1.17         | 0.26   | 0.12  | 22.60 | 5 | 1.03       | 0.24  | 0.11  | 22.86 | 5 | 0.4227             | Female_Naive                       |                 | BA    |
| 66 | Met-SO     | 2.10         | 0.96   | 0.43  | 45.91 | 5 | 2.80       | 1.55  | 0.69  | 55.30 | 5 | 0.4118             | Male_Naive                         |                 | BA    |
| 67 | Spermidine | 1.05         | 0.24   | 0.11  | 22.78 | 5 | 1.08       | 0.28  | 0.12  | 25.78 | 5 | 0.8534             | Male_Naive                         |                 | BA    |
| 68 | Spermine   | 0.49         | 0.14   | 0.06  | 28.17 | 5 | 0.41       | 0.03  | 0.02  | 8.29  | 5 | 0.2915             | Female_Naive                       |                 | BA    |
| 69 | Taurine    | 512.20       | 110.31 | 49.33 | 21.54 | 5 | 530.20     | 76.92 | 34.40 | 14.51 | 5 | 0.7723             | Male_Naive                         |                 | BA    |
| 70 | total DMA  | 0.61         | 0.04   | 0.02  | 7.30  | 5 | 0.56       | 0.04  | 0.02  | 7.74  | 5 | 0.1167             | Female_Naive                       |                 | BA    |
| 71 | LPC_14-0   | 3.20         | 0.43   | 0.19  | 13.34 | 5 | 2.86       | 0.50  | 0.22  | 17.38 | 5 | 0.2724             | Female_Naive                       |                 | LPC   |
| 72 | LPC_16-0   | 122.14       | 8.71   | 3.89  | 7.13  | 5 | 170.65     | 25.14 | 11.24 | 14.73 | 5 | 0.0035             | Male_Naive                         | *               | LPC   |
| 73 | LPC_16-1   | 2.68         | 0.25   | 0.11  | 9.39  | 5 | 3.81       | 0.88  | 0.39  | 22.95 | 5 | 0.0238             | Male_Naive                         |                 | LPC   |
| 74 | LPC_17-0   | 1.97         | 0.19   | 0.08  | 9.47  | 5 | 2.40       | 0.52  | 0.23  | 21.68 | 5 | 0.1212             | Male_Naive                         |                 | LPC   |
| 75 | LPC_18-0   | 59.83        | 5.48   | 2.45  | 9.17  | 5 | 67.81      | 11.77 | 5.26  | 17.36 | 5 | 0.2064             | Male_Naive                         |                 | LPC   |

Supplemental Table 3. (continued)

|     | Metabolite | Female_Naive |       |       |       |   | Male_Naive |       |       |       |   | P value<br>F vs. M | Differential<br>Expression<br>(up) | *<br>FDR<br><5% | Class |
|-----|------------|--------------|-------|-------|-------|---|------------|-------|-------|-------|---|--------------------|------------------------------------|-----------------|-------|
|     |            | mean         | SD    | SEM   | %CV   | N | mean       | SD    | SEM   | %CV   | N |                    |                                    |                 |       |
| 76  | LPC_18-1   | 25.51        | 3.19  | 1.43  | 12.51 | 5 | 31.35      | 6.37  | 2.85  | 20.33 | 5 | 0.1044             | Male_Naive                         |                 | LPC   |
| 77  | LPC_18-2   | 108.72       | 7.70  | 3.44  | 7.08  | 5 | 126.84     | 22.32 | 9.98  | 17.59 | 5 | 0.1245             | Male_Naive                         |                 | LPC   |
| 78  | LPC_20-3   | 4.22         | 0.53  | 0.24  | 12.50 | 5 | 6.43       | 1.67  | 0.75  | 25.99 | 5 | 0.0225             | Male_Naive                         |                 | LPC   |
| 79  | LPC_20-4   | 28.24        | 2.72  | 1.21  | 9.62  | 5 | 29.91      | 8.80  | 3.93  | 29.41 | 5 | 0.6951             | Male_Naive                         |                 | LPC   |
| 80  | LPC_24-0   | 0.32         | 0.03  | 0.02  | 10.66 | 5 | 0.47       | 0.11  | 0.05  | 22.61 | 5 | 0.0186             | Male_Naive                         |                 | LPC   |
| 81  | LPC_26-0   | 0.17         | 0.01  | 0.00  | 3.05  | 5 | 0.24       | 0.03  | 0.02  | 14.42 | 5 | 0.0027             | Male_Naive                         | *               | LPC   |
| 82  | LPC_26-1   | 0.08         | 0.01  | 0.01  | 14.52 | 5 | 0.12       | 0.02  | 0.01  | 18.06 | 5 | 0.0107             | Male_Naive                         | *               | LPC   |
| 83  | LPC_28-0   | 0.22         | 0.05  | 0.02  | 21.26 | 5 | 0.29       | 0.03  | 0.01  | 9.83  | 5 | 0.0258             | Male_Naive                         |                 | LPC   |
| 84  | LPC_28-1   | 0.15         | 0.01  | 0.01  | 8.48  | 5 | 0.21       | 0.04  | 0.02  | 17.55 | 5 | 0.0079             | Male_Naive                         | *               | LPC   |
| 85  | PC_24-0    | 0.13         | 0.03  | 0.01  | 24.71 | 5 | 0.11       | 0.02  | 0.01  | 20.12 | 5 | 0.4828             | Female_Naive                       |                 | PC    |
| 86  | PC_26-0    | 0.65         | 0.07  | 0.03  | 11.49 | 5 | 0.78       | 0.14  | 0.06  | 18.49 | 5 | 0.1043             | Male_Naive                         |                 | PC    |
| 87  | PC_28-1    | 0.22         | 0.06  | 0.02  | 25.29 | 5 | 0.23       | 0.02  | 0.01  | 9.62  | 5 | 0.6074             | Male_Naive                         |                 | PC    |
| 88  | PC_30-0    | 0.63         | 0.12  | 0.05  | 19.06 | 5 | 0.80       | 0.12  | 0.05  | 15.09 | 5 | 0.0524             | Male_Naive                         |                 | PC    |
| 89  | PC_30-2    | 0.07         | 0.02  | 0.01  | 25.93 | 5 | 0.06       | 0.02  | 0.01  | 35.22 | 5 | 0.5933             | Female_Naive                       |                 | PC    |
| 90  | PC_32-0    | 9.67         | 1.47  | 0.66  | 15.24 | 5 | 13.96      | 2.24  | 1.00  | 16.03 | 5 | 0.0071             | Male_Naive                         | *               | PC    |
| 91  | PC_32-1    | 2.52         | 0.61  | 0.27  | 24.01 | 5 | 4.45       | 0.86  | 0.39  | 19.35 | 5 | 0.0035             | Male_Naive                         | *               | PC    |
| 92  | PC_32-2    | 0.94         | 0.11  | 0.05  | 11.86 | 5 | 1.37       | 0.28  | 0.13  | 20.49 | 5 | 0.0126             | Male_Naive                         | *               | PC    |
| 93  | PC_32-3    | 0.14         | 0.03  | 0.01  | 20.96 | 5 | 0.20       | 0.03  | 0.01  | 15.12 | 5 | 0.0161             | Male_Naive                         | *               | PC    |
| 94  | PC_34-1    | 60.31        | 10.47 | 4.68  | 17.36 | 5 | 105.66     | 10.65 | 4.77  | 10.08 | 5 | 0.0001             | Male_Naive                         | *               | PC    |
| 95  | PC_34-2    | 286.15       | 31.65 | 14.15 | 11.06 | 5 | 388.82     | 30.91 | 13.82 | 7.95  | 5 | 0.0008             | Male_Naive                         | *               | PC    |
| 96  | PC_34-3    | 9.33         | 1.08  | 0.48  | 11.58 | 5 | 17.79      | 2.90  | 1.30  | 16.30 | 5 | 0.0003             | Male_Naive                         | *               | PC    |
| 97  | PC_34-4    | 0.39         | 0.04  | 0.02  | 11.20 | 5 | 0.66       | 0.18  | 0.08  | 26.51 | 5 | 0.0089             | Male_Naive                         | *               | PC    |
| 98  | PC_36-0    | 1.79         | 0.15  | 0.07  | 8.39  | 5 | 2.28       | 0.46  | 0.21  | 20.17 | 5 | 0.0511             | Male_Naive                         |                 | PC    |
| 99  | PC_36-1    | 16.73        | 3.95  | 1.77  | 23.61 | 5 | 24.16      | 3.55  | 1.59  | 14.70 | 5 | 0.0141             | Male_Naive                         | *               | PC    |
| 100 | PC_36-2    | 196.68       | 29.26 | 13.09 | 14.88 | 5 | 249.21     | 27.87 | 12.47 | 11.18 | 5 | 0.0197             | Male_Naive                         |                 | PC    |

Supplemental Table 3. (continued)

|            |           | Female_Naive |       |      |       |   | Male_Naive |       |       |       |   | P value<br>F vs. M | Differential<br>Expression<br>(up) | *<br>FDR<5% | Class |
|------------|-----------|--------------|-------|------|-------|---|------------|-------|-------|-------|---|--------------------|------------------------------------|-------------|-------|
| Metabolite |           | mean         | SD    | SEM  | %CV   | N | mean       | SD    | SEM   | %CV   | N |                    |                                    |             |       |
| 101        | PC_36-3   | 70.13        | 10.66 | 4.77 | 15.20 | 5 | 105.87     | 18.32 | 8.19  | 17.31 | 5 | 0.0055             | Male_Naive                         | *           | PC    |
| 102        | PC_36-4   | 106.93       | 13.93 | 6.23 | 13.03 | 5 | 168.46     | 32.06 | 14.34 | 19.03 | 5 | 0.0043             | Male_Naive                         | *           | PC    |
| 103        | PC_36-5   | 5.57         | 0.88  | 0.40 | 15.89 | 5 | 9.26       | 2.34  | 1.04  | 25.23 | 5 | 0.0108             | Male_Naive                         | *           | PC    |
| 104        | PC_36-6   | 0.27         | 0.04  | 0.02 | 13.01 | 5 | 0.42       | 0.12  | 0.05  | 28.98 | 5 | 0.0302             | Male_Naive                         |             | PC    |
| 105        | PC_38-0   | 1.23         | 0.14  | 0.06 | 11.74 | 5 | 1.84       | 0.42  | 0.19  | 23.00 | 5 | 0.0152             | Male_Naive                         | *           | PC    |
| 106        | PC_38-1   | 0.36         | 0.04  | 0.02 | 11.92 | 5 | 0.53       | 0.16  | 0.07  | 30.67 | 5 | 0.0572             | Male_Naive                         |             | PC    |
| 107        | PC_38-3   | 17.46        | 3.08  | 1.38 | 17.65 | 5 | 27.56      | 4.89  | 2.19  | 17.74 | 5 | 0.0045             | Male_Naive                         | *           | PC    |
| 108        | PC_38-4   | 82.79        | 11.31 | 5.06 | 13.66 | 5 | 97.53      | 23.64 | 10.57 | 24.24 | 5 | 0.2439             | Male_Naive                         |             | PC    |
| 109        | PC_38-5   | 23.38        | 3.45  | 1.54 | 14.74 | 5 | 35.01      | 9.08  | 4.06  | 25.93 | 5 | 0.0280             | Male_Naive                         |             | PC    |
| 110        | PC_38-6   | 81.05        | 8.55  | 3.82 | 10.55 | 5 | 133.00     | 28.12 | 12.58 | 21.15 | 5 | 0.0042             | Male_Naive                         | *           | PC    |
| 111        | PC_40-1   | 0.28         | 0.02  | 0.01 | 6.95  | 5 | 0.37       | 0.04  | 0.02  | 11.19 | 5 | 0.0022             | Male_Naive                         | *           | PC    |
| 112        | PC_40-2   | 0.21         | 0.01  | 0.00 | 4.27  | 5 | 0.47       | 0.04  | 0.02  | 9.19  | 5 | 0.0000             | Male_Naive                         | *           | PC    |
| 113        | PC_40-3   | 0.21         | 0.04  | 0.02 | 16.79 | 5 | 0.64       | 0.07  | 0.03  | 10.75 | 5 | 0.0000             | Male_Naive                         | *           | PC    |
| 114        | PC_40-4   | 1.12         | 0.13  | 0.06 | 11.71 | 5 | 2.73       | 0.41  | 0.18  | 14.91 | 5 | 0.0000             | Male_Naive                         | *           | PC    |
| 115        | PC_40-5   | 2.61         | 0.41  | 0.18 | 15.72 | 5 | 4.43       | 0.66  | 0.30  | 14.97 | 5 | 0.0008             | Male_Naive                         | *           | PC    |
| 116        | PC_40-6   | 32.82        | 4.62  | 2.07 | 14.07 | 5 | 38.71      | 8.74  | 3.91  | 22.56 | 5 | 0.2189             | Male_Naive                         |             | PC    |
| 117        | PC_42-0   | 0.18         | 0.01  | 0.01 | 7.22  | 5 | 0.24       | 0.03  | 0.01  | 10.64 | 5 | 0.0013             | Male_Naive                         | *           | PC    |
| 118        | PC_42-1   | 0.13         | 0.02  | 0.01 | 12.16 | 5 | 0.16       | 0.02  | 0.01  | 12.46 | 5 | 0.0186             | Male_Naive                         |             | PC    |
| 119        | PC_42-2   | 0.16         | 0.01  | 0.01 | 8.96  | 5 | 0.25       | 0.03  | 0.01  | 11.34 | 5 | 0.0002             | Male_Naive                         | *           | PC    |
| 120        | PC_42-4   | 0.14         | 0.02  | 0.01 | 13.31 | 5 | 0.25       | 0.04  | 0.02  | 14.80 | 5 | 0.0004             | Male_Naive                         | *           | PC    |
| 121        | PC_42-5   | 0.18         | 0.02  | 0.01 | 8.92  | 5 | 0.34       | 0.05  | 0.02  | 13.43 | 5 | 0.0001             | Male_Naive                         | *           | PC    |
| 122        | PC_42-6   | 0.38         | 0.05  | 0.02 | 11.89 | 5 | 1.01       | 0.10  | 0.05  | 10.16 | 5 | 0.0000             | Male_Naive                         | *           | PC    |
| 123        | PC_O-30-0 | 0.11         | 0.02  | 0.01 | 15.43 | 5 | 0.15       | 0.01  | 0.01  | 9.09  | 5 | 0.0057             | Male_Naive                         | *           | PC    |
| 124        | PC_O-30-1 | 0.09         | 0.02  | 0.01 | 24.79 | 5 | 0.15       | 0.03  | 0.01  | 22.16 | 5 | 0.0125             | Male_Naive                         | *           | PC    |
| 125        | PC_O-30-2 | 0.05         | 0.00  | 0.00 | 9.52  | 5 | 0.07       | 0.01  | 0.00  | 16.74 | 5 | 0.0073             | Male_Naive                         | *           | PC    |

Supplemental Table 3. (continued)

|     | Metabolite | Female_Naive |      |      |       |   | Male_Naive |      |      |       |   | P value<br>F vs. M | Differential<br>Expression<br>(up) | *<br>FDR<br><5% | Class |
|-----|------------|--------------|------|------|-------|---|------------|------|------|-------|---|--------------------|------------------------------------|-----------------|-------|
|     |            | mean         | SD   | SEM  | %CV   | N | mean       | SD   | SEM  | %CV   | N |                    |                                    |                 |       |
| 126 | PC_O-32-1  | 0.40         | 0.08 | 0.04 | 19.85 | 5 | 0.63       | 0.08 | 0.03 | 12.15 | 5 | 0.0014             | Male_Naive                         | *               | PC    |
| 127 | PC_O-32-2  | 0.14         | 0.02 | 0.01 | 14.61 | 5 | 0.29       | 0.04 | 0.02 | 12.99 | 5 | 0.0001             | Male_Naive                         | *               | PC    |
| 128 | PC_O-34-0  | 0.36         | 0.07 | 0.03 | 18.43 | 5 | 0.47       | 0.07 | 0.03 | 14.88 | 5 | 0.0270             | Male_Naive                         |                 | PC    |
| 129 | PC_O-34-1  | 1.98         | 0.20 | 0.09 | 9.84  | 5 | 3.17       | 0.57 | 0.25 | 17.93 | 5 | 0.0022             | Male_Naive                         | *               | PC    |
| 130 | PC_O-34-2  | 2.76         | 0.31 | 0.14 | 11.36 | 5 | 4.88       | 0.60 | 0.27 | 12.36 | 5 | 0.0001             | Male_Naive                         | *               | PC    |
| 131 | PC_O-34-3  | 0.80         | 0.13 | 0.06 | 16.26 | 5 | 1.46       | 0.18 | 0.08 | 12.58 | 5 | 0.0002             | Male_Naive                         | *               | PC    |
| 132 | PC_O-36-0  | 0.37         | 0.05 | 0.02 | 13.99 | 5 | 0.49       | 0.09 | 0.04 | 19.18 | 5 | 0.0357             | Male_Naive                         |                 | PC    |
| 133 | PC_O-36-1  | 1.64         | 0.24 | 0.11 | 14.74 | 5 | 2.31       | 0.32 | 0.14 | 13.95 | 5 | 0.0059             | Male_Naive                         | *               | PC    |
| 134 | PC_O-36-2  | 7.80         | 1.10 | 0.49 | 14.05 | 5 | 11.78      | 2.22 | 0.99 | 18.85 | 5 | 0.0070             | Male_Naive                         | *               | PC    |
| 135 | PC_O-36-3  | 1.57         | 0.19 | 0.08 | 11.82 | 5 | 2.65       | 0.41 | 0.18 | 15.53 | 5 | 0.0007             | Male_Naive                         | *               | PC    |
| 136 | PC_O-36-4  | 2.51         | 0.29 | 0.13 | 11.75 | 5 | 4.45       | 0.89 | 0.40 | 19.98 | 5 | 0.0017             | Male_Naive                         | *               | PC    |
| 137 | PC_O-36-5  | 1.48         | 0.27 | 0.12 | 18.53 | 5 | 2.06       | 0.52 | 0.23 | 25.10 | 5 | 0.0567             | Male_Naive                         |                 | PC    |
| 138 | PC_O-38-0  | 1.65         | 0.18 | 0.08 | 10.97 | 5 | 3.12       | 0.98 | 0.44 | 31.44 | 5 | 0.0109             | Male_Naive                         | *               | PC    |
| 139 | PC_O-38-1  | 0.52         | 0.12 | 0.05 | 22.02 | 5 | 0.85       | 0.15 | 0.07 | 18.15 | 5 | 0.0051             | Male_Naive                         | *               | PC    |
| 140 | PC_O-38-2  | 3.61         | 0.56 | 0.25 | 15.45 | 5 | 8.08       | 1.66 | 0.74 | 20.51 | 5 | 0.0005             | Male_Naive                         | *               | PC    |
| 141 | PC_O-38-3  | 1.40         | 0.21 | 0.09 | 14.73 | 5 | 2.08       | 0.48 | 0.22 | 23.15 | 5 | 0.0195             | Male_Naive                         |                 | PC    |
| 142 | PC_O-38-4  | 3.27         | 0.43 | 0.19 | 13.17 | 5 | 4.63       | 1.12 | 0.50 | 24.26 | 5 | 0.0360             | Male_Naive                         |                 | PC    |
| 143 | PC_O-38-5  | 2.36         | 0.25 | 0.11 | 10.53 | 5 | 3.72       | 0.97 | 0.44 | 26.16 | 5 | 0.0165             | Male_Naive                         | *               | PC    |
| 144 | PC_O-38-6  | 1.62         | 0.19 | 0.09 | 11.92 | 5 | 2.87       | 0.67 | 0.30 | 23.28 | 5 | 0.0038             | Male_Naive                         | *               | PC    |
| 145 | PC_O-40-1  | 2.07         | 0.22 | 0.10 | 10.57 | 5 | 3.98       | 1.09 | 0.49 | 27.37 | 5 | 0.0050             | Male_Naive                         | *               | PC    |
| 146 | PC_O-40-2  | 0.53         | 0.04 | 0.02 | 7.55  | 5 | 0.80       | 0.14 | 0.06 | 18.00 | 5 | 0.0036             | Male_Naive                         | *               | PC    |
| 147 | PC_O-40-3  | 0.44         | 0.05 | 0.02 | 10.52 | 5 | 0.71       | 0.16 | 0.07 | 22.51 | 5 | 0.0061             | Male_Naive                         | *               | PC    |
| 148 | PC_O-40-4  | 1.17         | 0.13 | 0.06 | 10.76 | 5 | 2.09       | 0.53 | 0.24 | 25.35 | 5 | 0.0053             | Male_Naive                         | *               | PC    |
| 149 | PC_O-40-5  | 0.77         | 0.09 | 0.04 | 11.40 | 5 | 1.10       | 0.24 | 0.11 | 21.52 | 5 | 0.0194             | Male_Naive                         |                 | PC    |
| 150 | PC_O-40-6  | 2.12         | 0.26 | 0.12 | 12.44 | 5 | 2.95       | 0.74 | 0.33 | 25.20 | 5 | 0.0474             | Male_Naive                         |                 | PC    |

Supplemental Table 3. (continued)

|     | Metabolite | Female_Naive |        |        |       |   | Male_Naive |         |        |       |   | P value<br>F vs. M | Differential<br>Expression<br>(up) | *<br>FDR<br><5% | Class |
|-----|------------|--------------|--------|--------|-------|---|------------|---------|--------|-------|---|--------------------|------------------------------------|-----------------|-------|
|     |            | mean         | SD     | SEM    | %CV   | N | mean       | SD      | SEM    | %CV   | N |                    |                                    |                 |       |
| 151 | PC_O-42-0  | 0.82         | 0.06   | 0.03   | 6.84  | 5 | 1.25       | 0.12    | 0.06   | 9.89  | 5 | 0.0001             | Male_Naive                         | *               | PC    |
| 152 | PC_O-42-1  | 0.41         | 0.07   | 0.03   | 16.29 | 5 | 0.61       | 0.12    | 0.05   | 20.09 | 5 | 0.0108             | Male_Naive                         | *               | PC    |
| 153 | PC_O-42-2  | 0.29         | 0.02   | 0.01   | 8.15  | 5 | 0.48       | 0.11    | 0.05   | 23.44 | 5 | 0.0060             | Male_Naive                         | *               | PC    |
| 154 | PC_O-42-3  | 0.70         | 0.06   | 0.03   | 8.99  | 5 | 1.30       | 0.34    | 0.15   | 26.37 | 5 | 0.0050             | Male_Naive                         | *               | PC    |
| 155 | PC_O-42-4  | 0.20         | 0.03   | 0.01   | 13.89 | 5 | 0.28       | 0.07    | 0.03   | 25.23 | 5 | 0.0445             | Male_Naive                         |                 | PC    |
| 156 | PC_O-42-5  | 0.52         | 0.02   | 0.01   | 4.78  | 5 | 0.64       | 0.08    | 0.04   | 12.53 | 5 | 0.0117             | Male_Naive                         | *               | PC    |
| 157 | PC_O-44-3  | 0.12         | 0.01   | 0.00   | 5.64  | 5 | 0.14       | 0.02    | 0.01   | 14.00 | 5 | 0.0269             | Male_Naive                         |                 | PC    |
| 158 | PC_O-44-4  | 0.12         | 0.01   | 0.00   | 5.70  | 5 | 0.16       | 0.03    | 0.01   | 17.95 | 5 | 0.0108             | Male_Naive                         | *               | PC    |
| 159 | PC_O-44-5  | 0.20         | 0.02   | 0.01   | 8.66  | 5 | 0.28       | 0.04    | 0.02   | 15.54 | 5 | 0.0049             | Male_Naive                         | *               | PC    |
| 160 | PC_O-44-6  | 0.15         | 0.02   | 0.01   | 16.69 | 5 | 0.21       | 0.04    | 0.02   | 17.41 | 5 | 0.0126             | Male_Naive                         | *               | PC    |
| 161 | SM_32-2 OH | 1.28         | 0.12   | 0.05   | 9.01  | 5 | 1.15       | 0.27    | 0.12   | 23.45 | 5 | 0.3387             | Female_Naive                       |                 | SM    |
| 162 | SM_34-2 OH | 0.30         | 0.04   | 0.02   | 12.09 | 5 | 0.31       | 0.05    | 0.02   | 16.91 | 5 | 0.7230             | Male_Naive                         |                 | SM    |
| 163 | SM_40-2 OH | 1.77         | 0.39   | 0.17   | 22.11 | 5 | 1.62       | 0.26    | 0.11   | 15.84 | 5 | 0.5079             | Female_Naive                       |                 | SM    |
| 164 | SM_40-3 OH | 1.06         | 0.19   | 0.09   | 18.36 | 5 | 1.37       | 0.35    | 0.16   | 25.47 | 5 | 0.1202             | Male_Naive                         |                 | SM    |
| 165 | SM_42-2 OH | 0.23         | 0.04   | 0.02   | 15.91 | 5 | 0.19       | 0.06    | 0.03   | 33.52 | 5 | 0.2701             | Female_Naive                       |                 | SM    |
| 166 | SM_34-1    | 15.96        | 1.75   | 0.78   | 10.96 | 5 | 18.99      | 3.04    | 1.36   | 15.99 | 5 | 0.0894             | Male_Naive                         |                 | SM    |
| 167 | SM_34-2    | 2.15         | 0.18   | 0.08   | 8.24  | 5 | 3.41       | 0.74    | 0.33   | 21.58 | 5 | 0.0059             | Male_Naive                         | *               | SM    |
| 168 | SM_36-1    | 2.09         | 0.37   | 0.17   | 17.75 | 5 | 1.73       | 0.35    | 0.15   | 19.97 | 5 | 0.1493             | Female_Naive                       |                 | SM    |
| 169 | SM_36-2    | 0.77         | 0.10   | 0.04   | 12.92 | 5 | 0.77       | 0.12    | 0.05   | 15.84 | 5 | 0.9824             | Male_Naive                         |                 | SM    |
| 170 | SM_38-3    | 0.08         | 0.02   | 0.01   | 25.32 | 5 | 0.07       | 0.02    | 0.01   | 32.73 | 5 | 0.5212             | Female_Naive                       |                 | SM    |
| 171 | SM_40-1    | 0.22         | 0.12   | 0.05   | 54.82 | 5 | 0.32       | 0.20    | 0.09   | 63.61 | 5 | 0.3583             | Male_Naive                         |                 | SM    |
| 172 | SM_42-1    | 3.66         | 0.50   | 0.22   | 13.73 | 5 | 6.63       | 0.46    | 0.21   | 6.98  | 5 | 0.0000             | Male_Naive                         | *               | SM    |
| 173 | SM_42-2    | 8.76         | 1.83   | 0.82   | 20.92 | 5 | 11.33      | 1.63    | 0.73   | 14.43 | 5 | 0.0474             | Male_Naive                         |                 | SM    |
| 174 | SM_44-1    | 0.04         | 0.01   | 0.01   | 28.11 | 5 | 0.02       | 0.00    | 0.00   | 17.71 | 5 | 0.0043             | Female_Naive                       | *               | SM    |
| 175 | H1         | 10145.06     | 948.80 | 424.31 | 9.35  | 5 | 11317.60   | 1552.10 | 694.12 | 13.71 | 5 | 0.1875             | Male_Naive                         |                 | S     |

Supplemental Table 3. (continued)

|     | Metabolite            | Female_Naive |        |        |       |   | Male_Naive |        |        |       |   | P value<br>F vs. M | Differential<br>Expression<br>(up) | *<br>FDR<br><5% | Class  |
|-----|-----------------------|--------------|--------|--------|-------|---|------------|--------|--------|-------|---|--------------------|------------------------------------|-----------------|--------|
|     |                       | mean         | SD     | SEM    | %CV   | N | mean       | SD     | SEM    | %CV   | N |                    |                                    |                 |        |
| 176 | C2,C3 / C0            | 0.78         | 0.12   | 0.06   | 15.87 | 5 | 0.67       | 0.10   | 0.05   | 15.08 | 5 | 0.1497             | Female_Naive                       |                 | AC     |
| 177 | AAA                   | 270.00       | 43.99  | 19.67  | 16.29 | 5 | 247.76     | 38.06  | 17.02  | 15.36 | 5 | 0.4175             | Female_Naive                       |                 | AA     |
| 178 | ADMA / Arg            | 0.01         | 0.00   | 0.00   | 46.42 | 5 | 0.01       | 0.00   | 0.00   | 18.11 | 5 | 0.9061             | Female_Naive                       |                 | BA, AA |
| 179 | BCAA                  | 608.00       | 127.71 | 57.11  | 21.00 | 5 | 639.70     | 128.93 | 57.66  | 20.15 | 5 | 0.7063             | Male_Naive                         |                 | AA     |
| 180 | C2 / C0               | 0.76         | 0.12   | 0.06   | 16.24 | 5 | 0.65       | 0.10   | 0.04   | 14.93 | 5 | 0.1458             | Female_Naive                       |                 | AC     |
| 181 | Cit / Arg             | 0.73         | 0.17   | 0.07   | 22.86 | 5 | 0.64       | 0.10   | 0.04   | 14.89 | 5 | 0.3335             | Female_Naive                       |                 | AA     |
| 182 | Cit / Orn             | 1.44         | 0.32   | 0.14   | 21.97 | 5 | 1.10       | 0.45   | 0.20   | 40.81 | 5 | 0.1994             | Female_Naive                       |                 | AA     |
| 183 | CPT-I ratio           | 0.02         | 0.00   | 0.00   | 20.66 | 5 | 0.02       | 0.00   | 0.00   | 17.00 | 5 | 0.5414             | Female_Naive                       |                 | AC     |
| 184 | Essential AA          | 1392.76      | 285.24 | 127.56 | 20.48 | 5 | 1428.14    | 284.60 | 127.28 | 19.93 | 5 | 0.8492             | Male_Naive                         |                 | AA     |
| 185 | Fisher ratio          | 2.24         | 0.21   | 0.09   | 9.30  | 5 | 2.58       | 0.32   | 0.14   | 12.41 | 5 | 0.0845             | Male_Naive                         |                 | AA     |
| 186 | Glucogenic AA         | 1193.20      | 258.25 | 115.49 | 21.64 | 5 | 1080.60    | 193.76 | 86.65  | 17.93 | 5 | 0.4579             | Female_Naive                       |                 | AA     |
| 187 | Kynurenine / Trp      | 0.01         | 0.00   | 0.00   | 19.33 | 5 | 0.01       | 0.00   | 0.00   | 21.37 | 5 | 0.2646             | Male_Naive                         |                 | AA     |
| 188 | Met-SO / Met          | 0.03         | 0.01   | 0.00   | 23.69 | 5 | 0.03       | 0.01   | 0.00   | 18.14 | 5 | 0.5204             | Male_Naive                         |                 | AA     |
| 189 | MUFA_PC               | 87.31        | 15.74  | 7.04   | 18.03 | 5 | 146.75     | 16.80  | 7.51   | 11.45 | 5 | 0.0004             | Male_Naive                         | *               | PC     |
| 190 | MUFA_PC / SFA_PC      | 4.96         | 0.48   | 0.22   | 9.78  | 5 | 5.80       | 0.37   | 0.17   | 6.44  | 5 | 0.0154             | Male_Naive                         | *               | PC     |
| 191 | Non essential AA      | 2267.62      | 314.19 | 140.51 | 13.86 | 5 | 2175.30    | 265.17 | 118.59 | 12.19 | 5 | 0.6291             | Female_Naive                       |                 | AA     |
| 192 | Orn / Arg             | 0.51         | 0.05   | 0.02   | 10.34 | 5 | 0.63       | 0.14   | 0.06   | 22.57 | 5 | 0.1153             | Male_Naive                         |                 | AA     |
| 193 | PUFA_PC               | 955.73       | 111.17 | 49.72  | 11.63 | 5 | 1344.15    | 195.30 | 87.34  | 14.53 | 5 | 0.0048             | Male_Naive                         | *               | PC     |
| 194 | PUFA_PC / MUFA_PC     | 11.06        | 1.04   | 0.46   | 9.38  | 5 | 9.15       | 0.69   | 0.31   | 7.57  | 5 | 0.0091             | Female_Naive                       | *               | PC     |
| 195 | PUFA_PC / SFA_PC      | 54.56        | 4.33   | 1.94   | 7.94  | 5 | 52.90      | 2.78   | 1.24   | 5.25  | 5 | 0.4894             | Female_Naive                       |                 | PC     |
| 196 | SFA_PC                | 17.57        | 2.25   | 1.01   | 12.79 | 5 | 25.51      | 4.26   | 1.90   | 16.69 | 5 | 0.0062             | Male_Naive                         | *               | PC     |
| 197 | Spermine / Spermidine | 0.46         | 0.07   | 0.03   | 14.28 | 5 | 0.40       | 0.09   | 0.04   | 22.43 | 5 | 0.2549             | Female_Naive                       |                 | BA, AA |
| 198 | Total_PC,SM           | 1098.80      | 128.16 | 57.31  | 11.66 | 5 | 1564.02    | 220.92 | 98.80  | 14.13 | 5 | 0.0036             | Male_Naive                         | *               | PC,SM  |
| 199 | Total AA              | 3902.24      | 609.58 | 272.61 | 15.62 | 5 | 3838.54    | 584.95 | 261.60 | 15.24 | 5 | 0.8703             | Female_Naive                       |                 | AA     |
| 200 | Total AC / C0         | 1.07         | 0.18   | 0.08   | 16.46 | 5 | 0.95       | 0.16   | 0.07   | 16.45 | 5 | 0.2615             | Female_Naive                       |                 | AC     |

**Supplemental Table 3.** (continued)

| Metabolite |                               | Female_Naive |        |       |       |   | Male_Naive |        |       |       |   | P value<br>F vs. M | Differential<br>Expression<br>(up) | *<br>FDR<br><5% | Class      |
|------------|-------------------------------|--------------|--------|-------|-------|---|------------|--------|-------|-------|---|--------------------|------------------------------------|-----------------|------------|
|            |                               | mean         | SD     | SEM   | %CV   | N | mean       | SD     | SEM   | %CV   | N |                    |                                    |                 |            |
| 201        | Total AC-DC / Total AC        | 0.06         | 0.02   | 0.01  | 33.03 | 5 | 0.07       | 0.02   | 0.01  | 26.82 | 5 | 0.5918             | Male_Naive                         |                 | AC         |
| 202        | Total AC-OH / Total AC        | 0.04         | 0.01   | 0.00  | 25.53 | 5 | 0.04       | 0.01   | 0.00  | 21.76 | 5 | 0.5264             | Male_Naive                         |                 | AC         |
| 203        | Total LPC                     | 357.48       | 21.28  | 9.52  | 5.95  | 5 | 443.41     | 76.78  | 34.34 | 17.32 | 5 | 0.0424             | Male_Naive                         |                 | LPC        |
| 204        | Total LPC / Total PC          | 0.34         | 0.04   | 0.02  | 10.91 | 5 | 0.29       | 0.02   | 0.01  | 7.51  | 5 | 0.0362             | Female_Naive                       |                 | LPC,P<br>C |
| 205        | Total PC                      | 1060.60      | 126.90 | 56.75 | 11.96 | 5 | 1516.40    | 213.96 | 95.68 | 14.11 | 5 | 0.0035             | Male_Naive                         | *               | PC         |
| 206        | Total PC_diacyl               | 1013.50      | 122.10 | 54.60 | 12.05 | 5 | 1439.06    | 198.87 | 88.94 | 13.82 | 5 | 0.0035             | Male_Naive                         | *               | PC         |
| 207        | Total PC_ether                | 47.10        | 5.08   | 2.27  | 10.78 | 5 | 77.35      | 15.34  | 6.86  | 19.83 | 5 | 0.0031             | Male_Naive                         | *               | PC         |
| 208        | Total SM                      | 38.20        | 5.05   | 2.26  | 13.23 | 5 | 47.62      | 7.12   | 3.18  | 14.94 | 5 | 0.0423             | Male_Naive                         |                 | SM         |
| 209        | Total SM / Total_SM,PC        | 0.04         | 0.01   | 0.00  | 15.35 | 5 | 0.03       | 0.00   | 0.00  | 2.94  | 5 | 0.0857             | Female_Naive                       |                 | SM,PC      |
| 210        | Total SM / Total PC           | 0.04         | 0.01   | 0.00  | 15.00 | 5 | 0.03       | 0.00   | 0.00  | 2.85  | 5 | 0.0779             | Female_Naive                       |                 | SM,PC      |
| 211        | Total SM-non OH               | 33.56        | 4.36   | 1.95  | 13.00 | 5 | 42.98      | 6.18   | 2.76  | 14.37 | 5 | 0.0238             | Male_Naive                         |                 | SM         |
| 212        | Total SM-OH                   | 4.64         | 0.73   | 0.32  | 15.65 | 5 | 4.64       | 0.98   | 0.44  | 21.01 | 5 | 0.9952             | Male_Naive                         |                 | SM         |
| 213        | Total SM-OH / Total SM-non OH | 0.14         | 0.01   | 0.00  | 5.73  | 5 | 0.11       | 0.01   | 0.00  | 8.98  | 5 | 0.0006             | Female_Naive                       | *               | SM         |
| 214        | Tyr / Phe                     | 1.21         | 0.16   | 0.07  | 13.04 | 5 | 1.11       | 0.12   | 0.05  | 10.70 | 5 | 0.2582             | Female_Naive                       |                 | AA         |

**Supplemental Table 4. Plasma metabolites assayed at 3 days post-8.72 Gy TBI: Female single-sex cohort.**  
 Metabolites assayed from 3 mo. old C57BL/6 mice; n=5 for each cohort (Naïve, TBI).

| Metabolite     | Female_Naive |      |      |       |   | Female_TBI |      |      |       |   | P value<br>Naive vs.<br>TBI | Differential<br>Expression<br>(Up) | *<br>FDR<5% | Class |
|----------------|--------------|------|------|-------|---|------------|------|------|-------|---|-----------------------------|------------------------------------|-------------|-------|
|                | mean         | SD   | SEM  | %CV   | N | mean       | SD   | SEM  | %CV   | N |                             |                                    |             |       |
| 1 C0           | 21.25        | 2.33 | 1.04 | 10.95 | 5 | 19.25      | 3.14 | 1.40 | 16.30 | 5 | 0.2851                      | Female_Naive                       | AC          |       |
| 2 C10          | 0.25         | 0.06 | 0.03 | 25.17 | 5 | 0.25       | 0.08 | 0.04 | 32.42 | 5 | 0.9699                      | Female_Naive                       | AC          |       |
| 3 C10-1        | 0.12         | 0.04 | 0.02 | 30.39 | 5 | 0.13       | 0.04 | 0.02 | 30.23 | 5 | 0.5589                      | Female_TBI                         | AC          |       |
| 4 C10-2        | 0.15         | 0.03 | 0.01 | 18.78 | 5 | 0.14       | 0.03 | 0.01 | 20.98 | 5 | 0.7380                      | Female_Naive                       | AC          |       |
| 5 C12          | 0.28         | 0.12 | 0.05 | 43.66 | 5 | 0.31       | 0.15 | 0.07 | 48.73 | 5 | 0.7454                      | Female_TBI                         | AC          |       |
| 6 C12-DC       | 0.45         | 0.04 | 0.02 | 9.07  | 5 | 0.50       | 0.05 | 0.02 | 10.93 | 5 | 0.1322                      | Female_TBI                         | AC          |       |
| 7 C12-1        | 0.26         | 0.05 | 0.02 | 19.21 | 5 | 0.28       | 0.07 | 0.03 | 23.48 | 5 | 0.6081                      | Female_TBI                         | AC          |       |
| 8 C14          | 0.15         | 0.05 | 0.02 | 32.33 | 5 | 0.15       | 0.05 | 0.02 | 36.06 | 5 | 0.8406                      | Female_Naive                       | AC          |       |
| 9 C14-1        | 0.07         | 0.02 | 0.01 | 28.94 | 5 | 0.07       | 0.03 | 0.01 | 35.23 | 5 | 0.9386                      | Female_Naive                       | AC          |       |
| 10 C14-1 OH    | 0.08         | 0.03 | 0.02 | 45.74 | 5 | 0.08       | 0.04 | 0.02 | 49.22 | 5 | 0.8820                      | Female_TBI                         | AC          |       |
| 11 C14-2       | 0.04         | 0.01 | 0.01 | 31.16 | 5 | 0.05       | 0.02 | 0.01 | 37.10 | 5 | 0.7569                      | Female_TBI                         | AC          |       |
| 12 C14-2 OH    | 0.10         | 0.03 | 0.01 | 27.57 | 5 | 0.10       | 0.03 | 0.01 | 31.13 | 5 | 0.8784                      | Female_TBI                         | AC          |       |
| 13 C16         | 0.24         | 0.04 | 0.02 | 15.22 | 5 | 0.20       | 0.05 | 0.02 | 26.60 | 5 | 0.1890                      | Female_Naive                       | AC          |       |
| 14 C16-OH      | 0.10         | 0.04 | 0.02 | 40.35 | 5 | 0.11       | 0.05 | 0.02 | 47.21 | 5 | 0.6300                      | Female_TBI                         | AC          |       |
| 15 C16-1       | 0.14         | 0.04 | 0.02 | 27.01 | 5 | 0.11       | 0.03 | 0.01 | 25.38 | 5 | 0.1615                      | Female_Naive                       | AC          |       |
| 16 C16-1 OH    | 0.08         | 0.04 | 0.02 | 47.25 | 5 | 0.09       | 0.05 | 0.02 | 53.54 | 5 | 0.7717                      | Female_TBI                         | AC          |       |
| 17 C16-2       | 0.05         | 0.01 | 0.01 | 26.34 | 5 | 0.05       | 0.02 | 0.01 | 33.13 | 5 | 0.8299                      | Female_TBI                         | AC          |       |
| 18 C16-2 OH    | 0.07         | 0.02 | 0.01 | 33.10 | 5 | 0.07       | 0.03 | 0.01 | 37.52 | 5 | 0.9593                      | Female_TBI                         | AC          |       |
| 19 C18         | 0.11         | 0.03 | 0.01 | 25.48 | 5 | 0.11       | 0.04 | 0.02 | 35.83 | 5 | 0.8698                      | Female_TBI                         | AC          |       |
| 20 C18-1       | 0.21         | 0.09 | 0.04 | 44.76 | 5 | 0.16       | 0.06 | 0.03 | 39.47 | 5 | 0.3663                      | Female_Naive                       | AC          |       |
| 21 C18-1 OH    | 0.07         | 0.02 | 0.01 | 34.84 | 5 | 0.08       | 0.03 | 0.01 | 38.49 | 5 | 0.6034                      | Female_TBI                         | AC          |       |
| 22 C18-2       | 0.09         | 0.02 | 0.01 | 21.16 | 5 | 0.07       | 0.02 | 0.01 | 29.24 | 5 | 0.3168                      | Female_Naive                       | AC          |       |
| 23 C2          | 16.01        | 1.50 | 0.67 | 9.39  | 5 | 13.14      | 1.88 | 0.84 | 14.28 | 5 | 0.0282                      | Female_Naive                       | AC          |       |
| 24 C3          | 0.47         | 0.14 | 0.06 | 29.40 | 5 | 0.43       | 0.09 | 0.04 | 20.27 | 5 | 0.5890                      | Female_Naive                       | AC          |       |
| 25 C3-DC_C4-OH | 0.21         | 0.07 | 0.03 | 30.76 | 5 | 0.18       | 0.05 | 0.02 | 28.78 | 5 | 0.4042                      | Female_Naive                       | AC          |       |

**Supplemental Table 4. (continued)**

| Metabolite | Female_Naive  |        |        |       |       | Female_TBI |        |        |        |       | P value<br>Naive vs.<br>TBI | Differential<br>Expression<br>(Up) | *<br>FDR<5%  | Class |
|------------|---------------|--------|--------|-------|-------|------------|--------|--------|--------|-------|-----------------------------|------------------------------------|--------------|-------|
|            | mean          | SD     | SEM    | %CV   | N     | mean       | SD     | SEM    | %CV    | N     |                             |                                    |              |       |
| 26         | C3-OH         | 0.13   | 0.05   | 0.02  | 33.89 | 5          | 0.15   | 0.05   | 0.02   | 34.65 | 5                           | 0.6194                             | Female_TBI   | AC    |
| 27         | C3-1          | 0.08   | 0.04   | 0.02  | 46.74 | 5          | 0.10   | 0.05   | 0.02   | 48.71 | 5                           | 0.5484                             | Female_TBI   | AC    |
| 28         | C4            | 0.41   | 0.13   | 0.06  | 32.63 | 5          | 0.37   | 0.10   | 0.05   | 27.96 | 5                           | 0.6609                             | Female_Naive | AC    |
| 29         | C4-1          | 0.09   | 0.03   | 0.01  | 29.49 | 5          | 0.10   | 0.04   | 0.02   | 33.97 | 5                           | 0.6139                             | Female_TBI   | AC    |
| 30         | C5            | 0.17   | 0.06   | 0.03  | 38.27 | 5          | 0.16   | 0.06   | 0.03   | 36.69 | 5                           | 0.7884                             | Female_Naive | AC    |
| 31         | C5-DC_C6-OH   | 0.24   | 0.13   | 0.06  | 55.34 | 5          | 0.26   | 0.15   | 0.07   | 57.04 | 5                           | 0.8474                             | Female_TBI   | AC    |
| 32         | C5-M-DC       | 0.19   | 0.09   | 0.04  | 48.55 | 5          | 0.19   | 0.08   | 0.04   | 45.00 | 5                           | 1.0000                             | Female_TBI   | AC    |
| 33         | C5-OH_C3-DC-M | 0.15   | 0.04   | 0.02  | 29.64 | 5          | 0.15   | 0.05   | 0.02   | 34.39 | 5                           | 0.9338                             | Female_Naive | AC    |
| 34         | C5-1          | 0.09   | 0.04   | 0.02  | 42.29 | 5          | 0.09   | 0.04   | 0.02   | 43.09 | 5                           | 0.9346                             | Female_TBI   | AC    |
| 35         | C5-1 DC       | 0.48   | 0.29   | 0.13  | 61.14 | 5          | 0.51   | 0.34   | 0.15   | 66.72 | 5                           | 0.8871                             | Female_TBI   | AC    |
| 36         | C6_C4-1 DC    | 0.21   | 0.11   | 0.05  | 52.50 | 5          | 0.22   | 0.13   | 0.06   | 60.39 | 5                           | 0.9018                             | Female_TBI   | AC    |
| 37         | C6-1          | 0.14   | 0.07   | 0.03  | 52.54 | 5          | 0.15   | 0.08   | 0.04   | 56.65 | 5                           | 0.8568                             | Female_TBI   | AC    |
| 38         | C7-DC         | 0.06   | 0.03   | 0.01  | 52.93 | 5          | 0.06   | 0.03   | 0.01   | 44.56 | 5                           | 0.7753                             | Female_TBI   | AC    |
| 39         | C8            | 0.12   | 0.05   | 0.02  | 39.88 | 5          | 0.11   | 0.04   | 0.02   | 30.84 | 5                           | 0.7992                             | Female_Naive | AC    |
| 40         | C9            | 0.25   | 0.06   | 0.03  | 23.74 | 5          | 0.25   | 0.05   | 0.02   | 20.81 | 5                           | 1.0000                             | Female_TBI   | AC    |
| 41         | Ala           | 773.20 | 188.96 | 84.51 | 24.44 | 5          | 963.60 | 248.24 | 111.02 | 25.76 | 5                           | 0.2095                             | Female_TBI   | AA    |
| 42         | Arg           | 108.94 | 28.60  | 12.79 | 26.26 | 5          | 96.80  | 21.59  | 9.66   | 22.31 | 5                           | 0.4705                             | Female_Naive | AA    |
| 43         | Asn           | 69.16  | 21.77  | 9.74  | 31.48 | 5          | 71.50  | 23.81  | 10.65  | 33.30 | 5                           | 0.8752                             | Female_TBI   | AA    |
| 44         | Asp           | 10.04  | 2.51   | 1.12  | 24.95 | 5          | 9.58   | 3.40   | 1.52   | 35.54 | 5                           | 0.8114                             | Female_Naive | AA    |
| 45         | Cit           | 77.36  | 17.77  | 7.95  | 22.97 | 5          | 38.84  | 10.27  | 4.59   | 26.45 | 5                           | 0.0030                             | Female_Naive | AA    |
| 46         | Gln           | 712.80 | 99.78  | 44.62 | 14.00 | 5          | 764.00 | 104.55 | 46.76  | 13.68 | 5                           | 0.4511                             | Female_TBI   | AA    |
| 47         | Glu           | 41.52  | 14.87  | 6.65  | 35.82 | 5          | 36.80  | 10.72  | 4.79   | 29.13 | 5                           | 0.5807                             | Female_Naive | AA    |
| 48         | Gly           | 236.40 | 28.85  | 12.90 | 12.20 | 5          | 235.40 | 58.22  | 26.04  | 24.73 | 5                           | 0.9734                             | Female_Naive | AA    |
| 49         | Ile           | 126.80 | 20.24  | 9.05  | 15.96 | 5          | 146.60 | 30.66  | 13.71  | 20.91 | 5                           | 0.2626                             | Female_TBI   | AA    |
| 50         | Leu           | 272.20 | 72.81  | 32.56 | 26.75 | 5          | 374.40 | 127.86 | 57.18  | 34.15 | 5                           | 0.1590                             | Female_TBI   | AA    |

**Supplemental Table 4.** (continued)

| Metabolite | Female_Naive |        |        |       |       | Female_TBI |        |       |       |       | P value<br>Naïve vs.<br>TBI | Differential<br>Expression<br>(Up) | *<br>FDR<5%  | Class |
|------------|--------------|--------|--------|-------|-------|------------|--------|-------|-------|-------|-----------------------------|------------------------------------|--------------|-------|
|            | mean         | SD     | SEM    | %CV   | N     | mean       | SD     | SEM   | %CV   | N     |                             |                                    |              |       |
| 51         | Lys          | 319.00 | 84.41  | 37.75 | 26.46 | 5          | 381.40 | 68.43 | 30.60 | 17.94 | 5                           | 0.2350                             | Female_TBI   | AA    |
| 52         | Met          | 74.00  | 27.78  | 12.42 | 37.54 | 5          | 94.44  | 26.83 | 12.00 | 28.41 | 5                           | 0.2706                             | Female_TBI   | AA    |
| 53         | Orn          | 55.56  | 15.67  | 7.01  | 28.20 | 5          | 58.84  | 16.03 | 7.17  | 27.24 | 5                           | 0.7519                             | Female_TBI   | AA    |
| 54         | Phe          | 76.56  | 11.92  | 5.33  | 15.58 | 5          | 89.26  | 17.37 | 7.77  | 19.46 | 5                           | 0.2147                             | Female_TBI   | AA    |
| 55         | Pro          | 146.66 | 51.69  | 23.11 | 35.24 | 5          | 196.00 | 81.62 | 36.50 | 41.64 | 5                           | 0.2865                             | Female_TBI   | AA    |
| 56         | Ser          | 183.60 | 56.04  | 25.06 | 30.52 | 5          | 248.60 | 95.30 | 42.62 | 38.34 | 5                           | 0.2251                             | Female_TBI   | AA    |
| 57         | Thr          | 216.00 | 62.55  | 27.97 | 28.96 | 5          | 249.20 | 37.53 | 16.79 | 15.06 | 5                           | 0.3386                             | Female_TBI   | AA    |
| 58         | Trp          | 99.20  | 17.19  | 7.69  | 17.32 | 5          | 120.50 | 16.14 | 7.22  | 13.39 | 5                           | 0.0780                             | Female_TBI   | AA    |
| 59         | Tyr          | 94.24  | 24.63  | 11.02 | 26.14 | 5          | 120.94 | 30.62 | 13.70 | 25.32 | 5                           | 0.1672                             | Female_TBI   | AA    |
| 60         | Val          | 209.00 | 43.66  | 19.53 | 20.89 | 5          | 225.40 | 47.47 | 21.23 | 21.06 | 5                           | 0.5852                             | Female_TBI   | AA    |
| 61         | Ac-Orn       | 2.38   | 0.34   | 0.15  | 14.18 | 5          | 1.61   | 0.59  | 0.26  | 36.58 | 5                           | 0.0357                             | Female_Naive | BA    |
| 62         | ADMA         | 0.74   | 0.20   | 0.09  | 26.80 | 5          | 0.65   | 0.12  | 0.05  | 18.74 | 5                           | 0.4210                             | Female_Naive | BA    |
| 63         | alpha-AAA    | 11.38  | 4.13   | 1.85  | 36.32 | 5          | 6.59   | 2.03  | 0.91  | 30.78 | 5                           | 0.0483                             | Female_Naive | BA    |
| 64         | Creatinine   | 6.56   | 0.67   | 0.30  | 10.18 | 5          | 5.64   | 0.75  | 0.33  | 13.27 | 5                           | 0.0760                             | Female_Naive | BA    |
| 65         | Kynurenine   | 1.17   | 0.26   | 0.12  | 22.60 | 5          | 1.51   | 0.32  | 0.14  | 21.03 | 5                           | 0.0991                             | Female_TBI   | BA    |
| 66         | Met-SO       | 2.10   | 0.96   | 0.43  | 45.91 | 5          | 2.45   | 0.94  | 0.42  | 38.47 | 5                           | 0.5704                             | Female_TBI   | BA    |
| 67         | Spermidine   | 1.05   | 0.24   | 0.11  | 22.78 | 5          | 0.65   | 0.22  | 0.10  | 33.31 | 5                           | 0.0243                             | Female_Naive | BA    |
| 68         | Spermine     | 0.49   | 0.14   | 0.06  | 28.17 | 5          | 0.44   | 0.17  | 0.08  | 39.61 | 5                           | 0.6649                             | Female_Naive | BA    |
| 69         | Taurine      | 512.20 | 110.31 | 49.33 | 21.54 | 5          | 461.20 | 55.76 | 24.93 | 12.09 | 5                           | 0.3832                             | Female_Naive | BA    |
| 70         | total DMA    | 0.61   | 0.04   | 0.02  | 7.30  | 5          | 0.53   | 0.05  | 0.02  | 9.75  | 5                           | 0.0344                             | Female_Naive | BA    |
| 71         | LPC_14-0     | 3.20   | 0.43   | 0.19  | 13.34 | 5          | 2.99   | 0.39  | 0.17  | 13.04 | 5                           | 0.4392                             | Female_Naive | LPC   |
| 72         | LPC_16-0     | 122.14 | 8.71   | 3.89  | 7.13  | 5          | 133.95 | 15.75 | 7.04  | 11.76 | 5                           | 0.1806                             | Female_TBI   | LPC   |
| 73         | LPC_16-1     | 2.68   | 0.25   | 0.11  | 9.39  | 5          | 2.76   | 0.32  | 0.14  | 11.43 | 5                           | 0.6595                             | Female_TBI   | LPC   |
| 74         | LPC_17-0     | 1.97   | 0.19   | 0.08  | 9.47  | 5          | 1.97   | 0.36  | 0.16  | 18.41 | 5                           | 0.9635                             | Female_Naive | LPC   |
| 75         | LPC_18-0     | 59.83  | 5.48   | 2.45  | 9.17  | 5          | 61.46  | 5.25  | 2.35  | 8.54  | 5                           | 0.6439                             | Female_TBI   | LPC   |

**Supplemental Table 4. (continued)**

| Metabolite | Female_Naive |        |       |       |       | Female_TBI |        |       |       |       | P value<br>Naive vs.<br>TBI | Differential<br>Expression<br>(Up) | *<br>FDR<5%  | Class |
|------------|--------------|--------|-------|-------|-------|------------|--------|-------|-------|-------|-----------------------------|------------------------------------|--------------|-------|
|            | mean         | SD     | SEM   | %CV   | N     | mean       | SD     | SEM   | %CV   | N     |                             |                                    |              |       |
| 76         | LPC_18-1     | 25.51  | 3.19  | 1.43  | 12.51 | 5          | 22.95  | 2.85  | 1.27  | 12.42 | 5                           | 0.2177                             | Female_Naive | LPC   |
| 77         | LPC_18-2     | 108.72 | 7.70  | 3.44  | 7.08  | 5          | 102.28 | 14.69 | 6.57  | 14.36 | 5                           | 0.4105                             | Female_Naive | LPC   |
| 78         | LPC_20-3     | 4.22   | 0.53  | 0.24  | 12.50 | 5          | 2.91   | 0.36  | 0.16  | 12.51 | 5                           | 0.0018                             | Female_Naive | LPC   |
| 79         | LPC_20-4     | 28.24  | 2.72  | 1.21  | 9.62  | 5          | 28.82  | 2.63  | 1.18  | 9.13  | 5                           | 0.7423                             | Female_TBI   | LPC   |
| 80         | LPC_24-0     | 0.32   | 0.03  | 0.02  | 10.66 | 5          | 0.38   | 0.05  | 0.02  | 12.90 | 5                           | 0.0720                             | Female_TBI   | LPC   |
| 81         | LPC_26-0     | 0.17   | 0.01  | 0.00  | 3.05  | 5          | 0.22   | 0.04  | 0.02  | 15.98 | 5                           | 0.0204                             | Female_TBI   | LPC   |
| 82         | LPC_26-1     | 0.08   | 0.01  | 0.01  | 14.52 | 5          | 0.11   | 0.02  | 0.01  | 19.21 | 5                           | 0.0467                             | Female_TBI   | LPC   |
| 83         | LPC_28-0     | 0.22   | 0.05  | 0.02  | 21.26 | 5          | 0.25   | 0.03  | 0.01  | 10.74 | 5                           | 0.2557                             | Female_TBI   | LPC   |
| 84         | LPC_28-1     | 0.15   | 0.01  | 0.01  | 8.48  | 5          | 0.18   | 0.01  | 0.00  | 3.06  | 5                           | 0.0056                             | Female_TBI   | LPC   |
| 85         | PC_24-0      | 0.13   | 0.03  | 0.01  | 24.71 | 5          | 0.11   | 0.01  | 0.00  | 8.88  | 5                           | 0.3259                             | Female_Naive | PC    |
| 86         | PC_26-0      | 0.65   | 0.07  | 0.03  | 11.49 | 5          | 0.80   | 0.05  | 0.02  | 6.47  | 5                           | 0.0060                             | Female_TBI   | PC    |
| 87         | PC_28-1      | 0.22   | 0.06  | 0.02  | 25.29 | 5          | 0.23   | 0.03  | 0.01  | 11.33 | 5                           | 0.6071                             | Female_TBI   | PC    |
| 88         | PC_30-0      | 0.63   | 0.12  | 0.05  | 19.06 | 5          | 0.70   | 0.17  | 0.08  | 24.93 | 5                           | 0.4612                             | Female_TBI   | PC    |
| 89         | PC_30-2      | 0.07   | 0.02  | 0.01  | 25.93 | 5          | 0.07   | 0.01  | 0.01  | 16.78 | 5                           | 0.8556                             | Female_TBI   | PC    |
| 90         | PC_32-0      | 9.67   | 1.47  | 0.66  | 15.24 | 5          | 11.43  | 1.81  | 0.81  | 15.80 | 5                           | 0.1293                             | Female_TBI   | PC    |
| 91         | PC_32-1      | 2.52   | 0.61  | 0.27  | 24.01 | 5          | 3.18   | 1.15  | 0.51  | 36.13 | 5                           | 0.2937                             | Female_TBI   | PC    |
| 92         | PC_32-2      | 0.94   | 0.11  | 0.05  | 11.86 | 5          | 1.04   | 0.17  | 0.08  | 16.31 | 5                           | 0.3110                             | Female_TBI   | PC    |
| 93         | PC_32-3      | 0.14   | 0.03  | 0.01  | 20.96 | 5          | 0.14   | 0.03  | 0.01  | 19.28 | 5                           | 0.9916                             | Female_TBI   | PC    |
| 94         | PC_34-1      | 60.31  | 10.47 | 4.68  | 17.36 | 5          | 56.24  | 3.60  | 1.61  | 6.41  | 5                           | 0.4347                             | Female_Naive | PC    |
| 95         | PC_34-2      | 286.15 | 31.65 | 14.15 | 11.06 | 5          | 304.13 | 38.87 | 17.38 | 12.78 | 5                           | 0.4457                             | Female_TBI   | PC    |
| 96         | PC_34-3      | 9.33   | 1.08  | 0.48  | 11.58 | 5          | 11.03  | 0.98  | 0.44  | 8.92  | 5                           | 0.0314                             | Female_TBI   | PC    |
| 97         | PC_34-4      | 0.39   | 0.04  | 0.02  | 11.20 | 5          | 0.43   | 0.04  | 0.02  | 8.76  | 5                           | 0.1189                             | Female_TBI   | PC    |
| 98         | PC_36-0      | 1.79   | 0.15  | 0.07  | 8.39  | 5          | 1.97   | 0.15  | 0.07  | 7.51  | 5                           | 0.0821                             | Female_TBI   | PC    |
| 99         | PC_36-1      | 16.73  | 3.95  | 1.77  | 23.61 | 5          | 13.52  | 1.17  | 0.53  | 8.68  | 5                           | 0.1194                             | Female_Naive | PC    |

**Supplemental Table 4.** (continued)

| Metabolite | Female_Naive |        |       |       |       | Female_TBI |        |       |      |       | P value<br>Naive vs.<br>TBI | Differential<br>Expression<br>(Up) | *<br>FDR<5%  | Class |
|------------|--------------|--------|-------|-------|-------|------------|--------|-------|------|-------|-----------------------------|------------------------------------|--------------|-------|
|            | mean         | SD     | SEM   | %CV   | N     | mean       | SD     | SEM   | %CV  | N     |                             |                                    |              |       |
| 100        | PC_36-2      | 196.68 | 29.26 | 13.09 | 14.88 | 5          | 185.32 | 17.74 | 7.94 | 9.57  | 5                           | 0.4791                             | Female_Naive | PC    |
| 101        | PC_36-3      | 70.13  | 10.66 | 4.77  | 15.20 | 5          | 64.34  | 9.41  | 4.21 | 14.62 | 5                           | 0.3895                             | Female_Naive | PC    |
| 102        | PC_36-4      | 106.93 | 13.93 | 6.23  | 13.03 | 5          | 123.30 | 9.53  | 4.26 | 7.73  | 5                           | 0.0620                             | Female_TBI   | PC    |
| 103        | PC_36-5      | 5.57   | 0.88  | 0.40  | 15.89 | 5          | 6.11   | 0.63  | 0.28 | 10.36 | 5                           | 0.2994                             | Female_TBI   | PC    |
| 104        | PC_36-6      | 0.27   | 0.04  | 0.02  | 13.01 | 5          | 0.31   | 0.04  | 0.02 | 11.96 | 5                           | 0.1649                             | Female_TBI   | PC    |
| 105        | PC_38-0      | 1.23   | 0.14  | 0.06  | 11.74 | 5          | 1.22   | 0.18  | 0.08 | 14.47 | 5                           | 0.9197                             | Female_Naive | PC    |
| 106        | PC_38-1      | 0.36   | 0.04  | 0.02  | 11.92 | 5          | 0.36   | 0.02  | 0.01 | 5.67  | 5                           | 0.9066                             | Female_Naive | PC    |
| 107        | PC_38-3      | 17.46  | 3.08  | 1.38  | 17.65 | 5          | 13.62  | 0.86  | 0.39 | 6.33  | 5                           | 0.0278                             | Female_Naive | PC    |
| 108        | PC_38-4      | 82.79  | 11.31 | 5.06  | 13.66 | 5          | 89.40  | 3.66  | 1.63 | 4.09  | 5                           | 0.2489                             | Female_TBI   | PC    |
| 109        | PC_38-5      | 23.38  | 3.45  | 1.54  | 14.74 | 5          | 23.73  | 1.92  | 0.86 | 8.07  | 5                           | 0.8474                             | Female_TBI   | PC    |
| 110        | PC_38-6      | 81.05  | 8.55  | 3.82  | 10.55 | 5          | 96.84  | 8.22  | 3.67 | 8.48  | 5                           | 0.0177                             | Female_TBI   | PC    |
| 111        | PC_40-1      | 0.28   | 0.02  | 0.01  | 6.95  | 5          | 0.29   | 0.02  | 0.01 | 6.43  | 5                           | 0.3645                             | Female_TBI   | PC    |
| 112        | PC_40-2      | 0.21   | 0.01  | 0.00  | 4.27  | 5          | 0.20   | 0.02  | 0.01 | 10.74 | 5                           | 0.3183                             | Female_Naive | PC    |
| 113        | PC_40-3      | 0.21   | 0.04  | 0.02  | 16.79 | 5          | 0.22   | 0.03  | 0.01 | 12.24 | 5                           | 0.8680                             | Female_TBI   | PC    |
| 114        | PC_40-4      | 1.12   | 0.13  | 0.06  | 11.71 | 5          | 1.01   | 0.08  | 0.04 | 8.20  | 5                           | 0.1474                             | Female_Naive | PC    |
| 115        | PC_40-5      | 2.61   | 0.41  | 0.18  | 15.72 | 5          | 2.26   | 0.11  | 0.05 | 5.09  | 5                           | 0.1002                             | Female_Naive | PC    |
| 116        | PC_40-6      | 32.82  | 4.62  | 2.07  | 14.07 | 5          | 34.97  | 3.12  | 1.40 | 8.93  | 5                           | 0.4135                             | Female_TBI   | PC    |
| 117        | PC_42-0      | 0.18   | 0.01  | 0.01  | 7.22  | 5          | 0.19   | 0.03  | 0.01 | 15.23 | 5                           | 0.4051                             | Female_TBI   | PC    |
| 118        | PC_42-1      | 0.13   | 0.02  | 0.01  | 12.16 | 5          | 0.14   | 0.02  | 0.01 | 12.31 | 5                           | 0.1735                             | Female_TBI   | PC    |
| 119        | PC_42-2      | 0.16   | 0.01  | 0.01  | 8.96  | 5          | 0.15   | 0.02  | 0.01 | 10.41 | 5                           | 0.4099                             | Female_Naive | PC    |
| 120        | PC_42-4      | 0.14   | 0.02  | 0.01  | 13.31 | 5          | 0.15   | 0.02  | 0.01 | 12.00 | 5                           | 0.5124                             | Female_TBI   | PC    |
| 121        | PC_42-5      | 0.18   | 0.02  | 0.01  | 8.92  | 5          | 0.19   | 0.02  | 0.01 | 10.10 | 5                           | 0.3621                             | Female_TBI   | PC    |
| 122        | PC_42-6      | 0.38   | 0.05  | 0.02  | 11.89 | 5          | 0.38   | 0.04  | 0.02 | 9.91  | 5                           | 0.7752                             | Female_Naive | PC    |
| 123        | PC_O-30-0    | 0.11   | 0.02  | 0.01  | 15.43 | 5          | 0.12   | 0.01  | 0.00 | 7.16  | 5                           | 0.3097                             | Female_TBI   | PC    |
| 124        | PC_O-30-1    | 0.09   | 0.02  | 0.01  | 24.79 | 5          | 0.11   | 0.02  | 0.01 | 20.51 | 5                           | 0.1268                             | Female_TBI   | PC    |
| 125        | PC_O-30-2    | 0.05   | 0.00  | 0.00  | 9.52  | 5          | 0.05   | 0.00  | 0.00 | 8.31  | 5                           | 0.5690                             | Female_TBI   | PC    |

**Supplemental Table 4.** (continued)

| Metabolite | Female_Naive |      |      |      |       | Female_TBI |      |      |      |       | P value<br>Naive vs.<br>TBI | Differential<br>Expression<br>(Up) | *<br>FDR<5%  | Class |
|------------|--------------|------|------|------|-------|------------|------|------|------|-------|-----------------------------|------------------------------------|--------------|-------|
|            | mean         | SD   | SEM  | %CV  | N     | mean       | SD   | SEM  | %CV  | N     |                             |                                    |              |       |
| 126        | PC_O-32-1    | 0.40 | 0.08 | 0.04 | 19.85 | 5          | 0.48 | 0.06 | 0.03 | 12.41 | 5                           | 0.0873                             | Female_TBI   | PC    |
| 127        | PC_O-32-2    | 0.14 | 0.02 | 0.01 | 14.61 | 5          | 0.14 | 0.02 | 0.01 | 13.08 | 5                           | 0.9878                             | Female_TBI   | PC    |
| 128        | PC_O-34-0    | 0.36 | 0.07 | 0.03 | 18.43 | 5          | 0.39 | 0.04 | 0.02 | 11.53 | 5                           | 0.3530                             | Female_TBI   | PC    |
| 129        | PC_O-34-1    | 1.98 | 0.20 | 0.09 | 9.84  | 5          | 2.07 | 0.19 | 0.08 | 9.14  | 5                           | 0.4960                             | Female_TBI   | PC    |
| 130        | PC_O-34-2    | 2.76 | 0.31 | 0.14 | 11.36 | 5          | 2.76 | 0.58 | 0.26 | 21.13 | 5                           | 0.9864                             | Female_TBI   | PC    |
| 131        | PC_O-34-3    | 0.80 | 0.13 | 0.06 | 16.26 | 5          | 0.66 | 0.09 | 0.04 | 13.85 | 5                           | 0.0889                             | Female_Naive | PC    |
| 132        | PC_O-36-0    | 0.37 | 0.05 | 0.02 | 13.99 | 5          | 0.37 | 0.03 | 0.02 | 9.04  | 5                           | 0.9777                             | Female_TBI   | PC    |
| 133        | PC_O-36-1    | 1.64 | 0.24 | 0.11 | 14.74 | 5          | 1.44 | 0.17 | 0.08 | 11.80 | 5                           | 0.1736                             | Female_Naive | PC    |
| 134        | PC_O-36-2    | 7.80 | 1.10 | 0.49 | 14.05 | 5          | 7.19 | 1.09 | 0.49 | 15.12 | 5                           | 0.4041                             | Female_Naive | PC    |
| 135        | PC_O-36-3    | 1.57 | 0.19 | 0.08 | 11.82 | 5          | 1.57 | 0.24 | 0.11 | 15.11 | 5                           | 0.9782                             | Female_TBI   | PC    |
| 136        | PC_O-36-4    | 2.51 | 0.29 | 0.13 | 11.75 | 5          | 2.64 | 0.32 | 0.14 | 11.94 | 5                           | 0.5039                             | Female_TBI   | PC    |
| 137        | PC_O-36-5    | 1.48 | 0.27 | 0.12 | 18.53 | 5          | 1.52 | 0.22 | 0.10 | 14.34 | 5                           | 0.7908                             | Female_TBI   | PC    |
| 138        | PC_O-38-0    | 1.65 | 0.18 | 0.08 | 10.97 | 5          | 1.96 | 0.16 | 0.07 | 8.11  | 5                           | 0.0215                             | Female_TBI   | PC    |
| 139        | PC_O-38-1    | 0.52 | 0.12 | 0.05 | 22.02 | 5          | 0.46 | 0.08 | 0.04 | 17.62 | 5                           | 0.3259                             | Female_Naive | PC    |
| 140        | PC_O-38-2    | 3.61 | 0.56 | 0.25 | 15.45 | 5          | 2.94 | 0.36 | 0.16 | 12.37 | 5                           | 0.0546                             | Female_Naive | PC    |
| 141        | PC_O-38-3    | 1.40 | 0.21 | 0.09 | 14.73 | 5          | 1.19 | 0.16 | 0.07 | 13.14 | 5                           | 0.1024                             | Female_Naive | PC    |
| 142        | PC_O-38-4    | 3.27 | 0.43 | 0.19 | 13.17 | 5          | 3.44 | 0.36 | 0.16 | 10.44 | 5                           | 0.5306                             | Female_TBI   | PC    |
| 143        | PC_O-38-5    | 2.36 | 0.25 | 0.11 | 10.53 | 5          | 2.25 | 0.20 | 0.09 | 8.77  | 5                           | 0.4714                             | Female_Naive | PC    |
| 144        | PC_O-38-6    | 1.62 | 0.19 | 0.09 | 11.92 | 5          | 1.66 | 0.22 | 0.10 | 13.42 | 5                           | 0.7846                             | Female_TBI   | PC    |
| 145        | PC_O-40-1    | 2.07 | 0.22 | 0.10 | 10.57 | 5          | 2.36 | 0.27 | 0.12 | 11.65 | 5                           | 0.1089                             | Female_TBI   | PC    |
| 146        | PC_O-40-2    | 0.53 | 0.04 | 0.02 | 7.55  | 5          | 0.50 | 0.04 | 0.02 | 8.83  | 5                           | 0.3181                             | Female_Naive | PC    |
| 147        | PC_O-40-3    | 0.44 | 0.05 | 0.02 | 10.52 | 5          | 0.41 | 0.04 | 0.02 | 10.66 | 5                           | 0.4001                             | Female_Naive | PC    |
| 148        | PC_O-40-4    | 1.17 | 0.13 | 0.06 | 10.76 | 5          | 1.21 | 0.13 | 0.06 | 10.61 | 5                           | 0.6448                             | Female_TBI   | PC    |
| 149        | PC_O-40-5    | 0.77 | 0.09 | 0.04 | 11.40 | 5          | 0.77 | 0.08 | 0.04 | 10.68 | 5                           | 0.9253                             | Female_Naive | PC    |
| 150        | PC_O-40-6    | 2.12 | 0.26 | 0.12 | 12.44 | 5          | 2.18 | 0.28 | 0.13 | 13.00 | 5                           | 0.7513                             | Female_TBI   | PC    |

**Supplemental Table 4.** (continued)

| Metabolite | Female_Naive |          |        |        |       | Female_TBI |          |         |        |       | P value<br>Naïve vs.<br>TBI | Differential<br>Expression<br>(Up) | *<br>FDR<5%  | Class |
|------------|--------------|----------|--------|--------|-------|------------|----------|---------|--------|-------|-----------------------------|------------------------------------|--------------|-------|
|            | mean         | SD       | SEM    | %CV    | N     | mean       | SD       | SEM     | %CV    | N     |                             |                                    |              |       |
| 151        | PC_O-42-0    | 0.82     | 0.06   | 0.03   | 6.84  | 5          | 0.78     | 0.05    | 0.02   | 6.86  | 5                           | 0.2785                             | Female_Naive | PC    |
| 152        | PC_O-42-1    | 0.41     | 0.07   | 0.03   | 16.29 | 5          | 0.45     | 0.06    | 0.03   | 12.79 | 5                           | 0.2622                             | Female_TBI   | PC    |
| 153        | PC_O-42-2    | 0.29     | 0.02   | 0.01   | 8.15  | 5          | 0.28     | 0.02    | 0.01   | 8.80  | 5                           | 0.4417                             | Female_Naive | PC    |
| 154        | PC_O-42-3    | 0.70     | 0.06   | 0.03   | 8.99  | 5          | 0.79     | 0.08    | 0.03   | 9.89  | 5                           | 0.0899                             | Female_TBI   | PC    |
| 155        | PC_O-42-4    | 0.20     | 0.03   | 0.01   | 13.89 | 5          | 0.16     | 0.02    | 0.01   | 11.99 | 5                           | 0.0531                             | Female_Naive | PC    |
| 156        | PC_O-42-5    | 0.52     | 0.02   | 0.01   | 4.78  | 5          | 0.51     | 0.03    | 0.01   | 6.30  | 5                           | 0.5616                             | Female_Naive | PC    |
| 157        | PC_O-44-3    | 0.12     | 0.01   | 0.00   | 5.64  | 5          | 0.13     | 0.01    | 0.00   | 5.63  | 5                           | 0.0197                             | Female_TBI   | PC    |
| 158        | PC_O-44-4    | 0.12     | 0.01   | 0.00   | 5.70  | 5          | 0.12     | 0.01    | 0.00   | 9.64  | 5                           | 0.9467                             | Female_TBI   | PC    |
| 159        | PC_O-44-5    | 0.20     | 0.02   | 0.01   | 8.66  | 5          | 0.22     | 0.01    | 0.01   | 5.99  | 5                           | 0.1359                             | Female_TBI   | PC    |
| 160        | PC_O-44-6    | 0.15     | 0.02   | 0.01   | 16.69 | 5          | 0.14     | 0.02    | 0.01   | 15.13 | 5                           | 0.8943                             | Female_Naive | PC    |
| 161        | SM_32-2 OH   | 1.28     | 0.12   | 0.05   | 9.01  | 5          | 1.39     | 0.20    | 0.09   | 14.03 | 5                           | 0.3117                             | Female_TBI   | SM    |
| 162        | SM_34-2 OH   | 0.30     | 0.04   | 0.02   | 12.09 | 5          | 0.35     | 0.04    | 0.02   | 12.09 | 5                           | 0.1267                             | Female_TBI   | SM    |
| 163        | SM_40-2 OH   | 1.77     | 0.39   | 0.17   | 22.11 | 5          | 1.78     | 0.18    | 0.08   | 10.39 | 5                           | 0.9688                             | Female_TBI   | SM    |
| 164        | SM_40-3 OH   | 1.06     | 0.19   | 0.09   | 18.36 | 5          | 1.05     | 0.11    | 0.05   | 10.30 | 5                           | 0.9487                             | Female_Naive | SM    |
| 165        | SM_42-2 OH   | 0.23     | 0.04   | 0.02   | 15.91 | 5          | 0.23     | 0.03    | 0.02   | 14.37 | 5                           | 0.7935                             | Female_TBI   | SM    |
| 166        | SM_34-1      | 15.96    | 1.75   | 0.78   | 10.96 | 5          | 19.47    | 1.72    | 0.77   | 8.84  | 5                           | 0.0126                             | Female_TBI   | SM    |
| 167        | SM_34-2      | 2.15     | 0.18   | 0.08   | 8.24  | 5          | 2.60     | 0.21    | 0.09   | 7.91  | 5                           | 0.0065                             | Female_TBI   | SM    |
| 168        | SM_36-1      | 2.09     | 0.37   | 0.17   | 17.75 | 5          | 2.62     | 0.46    | 0.21   | 17.64 | 5                           | 0.0823                             | Female_TBI   | SM    |
| 169        | SM_36-2      | 0.77     | 0.10   | 0.04   | 12.92 | 5          | 0.95     | 0.08    | 0.04   | 8.83  | 5                           | 0.0143                             | Female_TBI   | SM    |
| 170        | SM_38-3      | 0.08     | 0.02   | 0.01   | 25.32 | 5          | 0.08     | 0.02    | 0.01   | 26.52 | 5                           | 0.7713                             | Female_Naive | SM    |
| 171        | SM_40-1      | 0.22     | 0.12   | 0.05   | 54.82 | 5          | 0.16     | 0.10    | 0.04   | 61.01 | 5                           | 0.4022                             | Female_Naive | SM    |
| 172        | SM_42-1      | 3.66     | 0.50   | 0.22   | 13.73 | 5          | 3.33     | 0.32    | 0.14   | 9.67  | 5                           | 0.2512                             | Female_Naive | SM    |
| 173        | SM_42-2      | 8.76     | 1.83   | 0.82   | 20.92 | 5          | 9.91     | 0.75    | 0.34   | 7.58  | 5                           | 0.2319                             | Female_TBI   | SM    |
| 174        | SM_44-1      | 0.04     | 0.01   | 0.01   | 28.11 | 5          | 0.04     | 0.01    | 0.01   | 36.54 | 5                           | 0.9055                             | Female_Naive | SM    |
| 175        | H1           | 10145.06 | 948.80 | 424.31 | 9.35  | 5          | 11496.55 | 1208.79 | 540.59 | 10.51 | 5                           | 0.0848                             | Female_TBI   | S     |

**Supplemental Table 4.** (continued)

| Metabolite                | Female_Naive |        |        |       |   | Female_TBI |        |        |       |   | P value<br>Naïve vs.<br>TBI | Differential<br>Expression<br>(Up) | *<br>FDR<5% | Class |
|---------------------------|--------------|--------|--------|-------|---|------------|--------|--------|-------|---|-----------------------------|------------------------------------|-------------|-------|
|                           | mean         | SD     | SEM    | %CV   | N | mean       | SD     | SEM    | %CV   | N |                             |                                    |             |       |
| 176 C2,C3 / C0            | 0.78         | 0.12   | 0.06   | 15.87 | 5 | 0.71       | 0.13   | 0.06   | 18.21 | 5 | 0.4165                      | Female_Naive                       | AC          |       |
| 177 AAA                   | 270.00       | 43.99  | 19.67  | 16.29 | 5 | 330.70     | 60.30  | 26.97  | 18.23 | 5 | 0.1065                      | Female_TBI                         | AA          |       |
| 178 ADMA / Arg            | 0.01         | 0.00   | 0.00   | 46.42 | 5 | 0.01       | 0.00   | 0.00   | 21.81 | 5 | 0.7292                      | Female_Naive                       | BA,AA       |       |
| 179 BCAA                  | 608.00       | 127.71 | 57.11  | 21.00 | 5 | 746.40     | 187.12 | 83.68  | 25.07 | 5 | 0.2091                      | Female_TBI                         | AA          |       |
| 180 C2 / C0               | 0.76         | 0.12   | 0.06   | 16.24 | 5 | 0.69       | 0.13   | 0.06   | 18.80 | 5 | 0.4153                      | Female_Naive                       | AC          |       |
| 181 Cit / Arg             | 0.73         | 0.17   | 0.07   | 22.86 | 5 | 0.42       | 0.15   | 0.07   | 36.74 | 5 | 0.0154                      | Female_Naive                       | AA          |       |
| 182 Cit / Orn             | 1.44         | 0.32   | 0.14   | 21.97 | 5 | 0.70       | 0.28   | 0.13   | 40.48 | 5 | 0.0046                      | Female_Naive                       | AA          |       |
| 183 CPT-I ratio           | 0.02         | 0.00   | 0.00   | 20.66 | 5 | 0.02       | 0.00   | 0.00   | 16.72 | 5 | 0.7599                      | Female_Naive                       | AA          |       |
| 184 Essential AA          | 1392.76      | 285.24 | 127.56 | 20.48 | 5 | 1681.20    | 314.85 | 140.80 | 18.73 | 5 | 0.1675                      | Female_TBI                         | AA          |       |
| 185 Fisher ratio          | 2.24         | 0.21   | 0.09   | 9.30  | 5 | 2.24       | 0.30   | 0.13   | 13.21 | 5 | 0.9971                      | Female_TBI                         | AA          |       |
| 186 Glucogenic AA         | 1193.20      | 258.25 | 115.49 | 21.64 | 5 | 1447.60    | 398.75 | 178.33 | 27.55 | 5 | 0.2654                      | Female_TBI                         | AA          |       |
| 187 Kynurenine / Trp      | 0.01         | 0.00   | 0.00   | 19.33 | 5 | 0.01       | 0.00   | 0.00   | 26.68 | 5 | 0.6713                      | Female_TBI                         | AA          |       |
| 188 Met-SO / Met          | 0.03         | 0.01   | 0.00   | 23.69 | 5 | 0.03       | 0.00   | 0.00   | 18.86 | 5 | 0.5314                      | Female_Naive                       | AA          |       |
| 189 MUFA_PC               | 87.31        | 15.74  | 7.04   | 18.03 | 5 | 80.98      | 5.29   | 2.36   | 6.53  | 5 | 0.4191                      | Female_Naive                       | PC          |       |
| 190 MUFA_PC / SFA_PC      | 4.96         | 0.48   | 0.22   | 9.78  | 5 | 4.06       | 0.31   | 0.14   | 7.56  | 5 | 0.0084                      | Female_Naive                       | PC          |       |
| 191 Non essential AA      | 2267.62      | 314.19 | 140.51 | 13.86 | 5 | 2646.42    | 549.71 | 245.84 | 20.77 | 5 | 0.2178                      | Female_TBI                         | AA          |       |
| 192 Orn / Arg             | 0.51         | 0.05   | 0.02   | 10.34 | 5 | 0.60       | 0.04   | 0.02   | 7.31  | 5 | 0.0167                      | Female_TBI                         | AA          |       |
| 193 PUFA_PC               | 955.73       | 111.17 | 49.72  | 11.63 | 5 | 994.69     | 91.53  | 40.93  | 9.20  | 5 | 0.5619                      | Female_TBI                         | PC          |       |
| 194 PUFA_PC / MUFA_PC     | 11.06        | 1.04   | 0.46   | 9.38  | 5 | 12.29      | 0.99   | 0.44   | 8.03  | 5 | 0.0910                      | Female_TBI                         | PC          |       |
| 195 PUFA_PC / SFA_PC      | 54.56        | 4.33   | 1.94   | 7.94  | 5 | 50.04      | 6.05   | 2.70   | 12.08 | 5 | 0.2107                      | Female_Naive                       | PC          |       |
| 196 SFA_PC                | 17.57        | 2.25   | 1.01   | 12.79 | 5 | 20.04      | 2.26   | 1.01   | 11.29 | 5 | 0.1212                      | Female_TBI                         | PC          |       |
| 197 Spermine / Spermidine | 0.46         | 0.07   | 0.03   | 14.28 | 5 | 0.70       | 0.20   | 0.09   | 29.13 | 5 | 0.0370                      | Female_TBI                         | BA          |       |
| 198 Total_PC,SM           | 1098.80      | 128.16 | 57.31  | 11.66 | 5 | 1139.53    | 96.55  | 43.18  | 8.47  | 5 | 0.5859                      | Female_TBI                         | PC,SM       |       |
| 199 Total AA              | 3902.24      | 609.58 | 272.61 | 15.62 | 5 | 4522.10    | 858.83 | 384.08 | 18.99 | 5 | 0.2246                      | Female_TBI                         | AA          |       |
| 200 Total AC / C0         | 1.07         | 0.18   | 0.08   | 16.46 | 5 | 1.03       | 0.13   | 0.06   | 12.76 | 5 | 0.6725                      | Female_Naive                       | AC          |       |

**Supplemental Table 4.** (continued)

| Metabolite                        | Female_Naive |        |       |       |   | Female_TBI |       |       |       |   | P value<br>Naïve vs.<br>TBI | Differential<br>Expression<br>(Up) | *<br>FDR<5% | Class |
|-----------------------------------|--------------|--------|-------|-------|---|------------|-------|-------|-------|---|-----------------------------|------------------------------------|-------------|-------|
|                                   | mean         | SD     | SEM   | %CV   | N | mean       | SD    | SEM   | %CV   | N |                             |                                    |             |       |
| 201 Total AC-DC / Total AC        | 0.06         | 0.02   | 0.01  | 33.03 | 5 | 0.08       | 0.02  | 0.01  | 30.23 | 5 | 0.3394                      | Female_TBI                         | AC          |       |
| 202 Total AC-OH / Total AC        | 0.04         | 0.01   | 0.00  | 25.53 | 5 | 0.04       | 0.01  | 0.00  | 25.67 | 5 | 0.3646                      | Female_TBI                         | AC          |       |
| 203 Total LPC                     | 357.48       | 21.28  | 9.52  | 5.95  | 5 | 361.22     | 41.12 | 18.39 | 11.38 | 5 | 0.8609                      | Female_TBI                         | LPC         |       |
| 204 Total LPC / Total PC          | 0.34         | 0.04   | 0.02  | 10.91 | 5 | 0.33       | 0.03  | 0.01  | 7.88  | 5 | 0.6282                      | Female_Naive                       | LPC,PC      |       |
| 205 Total PC                      | 1060.60      | 126.90 | 56.75 | 11.96 | 5 | 1095.71    | 95.09 | 42.52 | 8.68  | 5 | 0.6339                      | Female_TBI                         | PC          |       |
| 206 Total PC_diacyl               | 1013.50      | 122.10 | 54.60 | 12.05 | 5 | 1049.29    | 90.84 | 40.62 | 8.66  | 5 | 0.6133                      | Female_TBI                         | PC          |       |
| 207 Total PC_ether                | 47.10        | 5.08   | 2.27  | 10.78 | 5 | 46.42      | 5.42  | 2.42  | 11.68 | 5 | 0.8434                      | Female_Naive                       | PC          |       |
| 208 Total SM                      | 38.20        | 5.05   | 2.26  | 13.23 | 5 | 43.82      | 3.50  | 1.57  | 8.00  | 5 | 0.0752                      | Female_TBI                         | SM          |       |
| 209 Total SM / Total_SM,PC        | 0.04         | 0.01   | 0.00  | 15.35 | 5 | 0.04       | 0.00  | 0.00  | 8.71  | 5 | 0.2664                      | Female_TBI                         | SM,PC       |       |
| 210 Total SM / Total PC           | 0.04         | 0.01   | 0.00  | 15.00 | 5 | 0.04       | 0.00  | 0.00  | 9.21  | 5 | 0.2336                      | Female_TBI                         | SM,PC       |       |
| 211 Total SM-non OH               | 33.56        | 4.36   | 1.95  | 13.00 | 5 | 39.02      | 3.00  | 1.34  | 7.68  | 5 | 0.0499                      | Female_TBI                         | SM          |       |
| 212 Total SM-OH                   | 4.64         | 0.73   | 0.32  | 15.65 | 5 | 4.80       | 0.54  | 0.24  | 11.17 | 5 | 0.7032                      | Female_TBI                         | SM          |       |
| 213 Total SM-OH / Total SM-non OH | 0.14         | 0.01   | 0.00  | 5.73  | 5 | 0.12       | 0.01  | 0.00  | 4.71  | 5 | 0.0079                      | Female_Naive                       | SM          |       |
| 214 Tyr / Phe                     | 1.21         | 0.16   | 0.07  | 13.04 | 5 | 1.35       | 0.18  | 0.08  | 13.27 | 5 | 0.2495                      | Female_TBI                         | AA          |       |

**Supplemental Table 5. Plasma metabolites assayed at 3 days post-8.72 Gy TBI: Male single-sex cohort.**  
 Metabolites assayed from 3 mo. old C57BL/6 mice; n=5 for each cohort (Naïve, TBI).

|    | Metabolite  | Male_Naive |      |      |       |   | Male_TBI |      |      |       |   | P value<br>Naive vs.<br>TBI | Differential<br>Expression<br>(Up) | *<br>FDR<5% | Class |
|----|-------------|------------|------|------|-------|---|----------|------|------|-------|---|-----------------------------|------------------------------------|-------------|-------|
|    |             | mean       | SD   | SEM  | %CV   | N | mean     | SD   | SEM  | %CV   | N |                             |                                    |             |       |
| 1  | C0          | 22.77      | 3.90 | 1.74 | 17.13 | 5 | 18.15    | 2.31 | 1.03 | 12.73 | 5 | 0.0521                      | Male_Naive                         |             | AC    |
| 2  | C10         | 0.26       | 0.08 | 0.03 | 29.49 | 5 | 0.26     | 0.08 | 0.04 | 31.85 | 5 | 0.9675                      | Male_Naive                         |             | AC    |
| 3  | C10-1       | 0.13       | 0.03 | 0.02 | 26.21 | 5 | 0.12     | 0.03 | 0.01 | 26.58 | 5 | 0.6578                      | Male_Naive                         |             | AC    |
| 4  | C10-2       | 0.14       | 0.04 | 0.02 | 25.18 | 5 | 0.15     | 0.04 | 0.02 | 28.48 | 5 | 0.7913                      | Male_TBI                           |             | AC    |
| 5  | C12         | 0.30       | 0.12 | 0.05 | 40.81 | 5 | 0.31     | 0.13 | 0.06 | 42.07 | 5 | 0.8757                      | Male_TBI                           |             | AC    |
| 6  | C12-DC      | 0.48       | 0.05 | 0.02 | 11.10 | 5 | 0.48     | 0.05 | 0.02 | 11.27 | 5 | 0.9693                      | Male_TBI                           |             | AC    |
| 7  | C12-1       | 0.30       | 0.04 | 0.02 | 13.55 | 5 | 0.27     | 0.06 | 0.03 | 23.26 | 5 | 0.5349                      | Male_Naive                         |             | AC    |
| 8  | C14         | 0.16       | 0.05 | 0.02 | 32.41 | 5 | 0.16     | 0.05 | 0.02 | 29.61 | 5 | 0.8929                      | Male_Naive                         |             | AC    |
| 9  | C14-1       | 0.07       | 0.02 | 0.01 | 32.21 | 5 | 0.08     | 0.02 | 0.01 | 31.31 | 5 | 0.6840                      | Male_TBI                           |             | AC    |
| 10 | C14-1 OH    | 0.08       | 0.04 | 0.02 | 42.66 | 5 | 0.08     | 0.03 | 0.01 | 39.96 | 5 | 0.9895                      | Male_Naive                         |             | AC    |
| 11 | C14-2       | 0.05       | 0.02 | 0.01 | 33.70 | 5 | 0.05     | 0.02 | 0.01 | 31.83 | 5 | 0.9765                      | Male_Naive                         |             | AC    |
| 12 | C14-2 OH    | 0.10       | 0.03 | 0.01 | 27.65 | 5 | 0.10     | 0.04 | 0.02 | 34.78 | 5 | 0.8450                      | Male_TBI                           |             | AC    |
| 13 | C16         | 0.24       | 0.06 | 0.03 | 25.93 | 5 | 0.23     | 0.05 | 0.02 | 20.31 | 5 | 0.7252                      | Male_Naive                         |             | AC    |
| 14 | C16-OH      | 0.10       | 0.04 | 0.02 | 37.79 | 5 | 0.11     | 0.04 | 0.02 | 40.79 | 5 | 0.9668                      | Male_TBI                           |             | AC    |
| 15 | C16-1       | 0.14       | 0.03 | 0.01 | 23.18 | 5 | 0.13     | 0.06 | 0.03 | 46.01 | 5 | 0.7801                      | Male_Naive                         |             | AC    |
| 16 | C16-1 OH    | 0.09       | 0.04 | 0.02 | 44.08 | 5 | 0.10     | 0.04 | 0.02 | 45.50 | 5 | 0.7892                      | Male_TBI                           |             | AC    |
| 17 | C16-2       | 0.05       | 0.02 | 0.01 | 30.33 | 5 | 0.05     | 0.02 | 0.01 | 31.31 | 5 | 0.8629                      | Male_TBI                           |             | AC    |
| 18 | C16-2 OH    | 0.07       | 0.02 | 0.01 | 32.85 | 5 | 0.07     | 0.03 | 0.01 | 35.17 | 5 | 0.8512                      | Male_TBI                           |             | AC    |
| 19 | C18         | 0.11       | 0.03 | 0.01 | 29.57 | 5 | 0.12     | 0.04 | 0.02 | 35.44 | 5 | 0.6773                      | Male_TBI                           |             | AC    |
| 20 | C18-1       | 0.17       | 0.06 | 0.03 | 36.11 | 5 | 0.20     | 0.07 | 0.03 | 36.04 | 5 | 0.4578                      | Male_TBI                           |             | AC    |
| 21 | C18-1 OH    | 0.07       | 0.02 | 0.01 | 31.81 | 5 | 0.07     | 0.02 | 0.01 | 30.66 | 5 | 0.8911                      | Male_TBI                           |             | AC    |
| 22 | C18-2       | 0.08       | 0.03 | 0.01 | 32.47 | 5 | 0.08     | 0.01 | 0.01 | 16.80 | 5 | 0.8129                      | Male_TBI                           |             | AC    |
| 23 | C2          | 14.79      | 3.43 | 1.53 | 23.20 | 5 | 12.91    | 1.63 | 0.73 | 12.63 | 5 | 0.3006                      | Male_Naive                         |             | AC    |
| 24 | C3          | 0.48       | 0.11 | 0.05 | 23.43 | 5 | 0.47     | 0.12 | 0.05 | 26.19 | 5 | 0.9054                      | Male_Naive                         |             | AC    |
| 25 | C3-DC_C4-OH | 0.23       | 0.08 | 0.04 | 35.34 | 5 | 0.20     | 0.05 | 0.02 | 24.38 | 5 | 0.5044                      | Male_Naive                         |             | AC    |

**Supplemental Table 5. (continued)**

|    | Metabolite    | Male_Naive |        |       |       |   | Male_TBI |        |       |       |   | P value<br>Naive vs.<br>TBI | Differential<br>Expression<br>(Up) | *<br>FDR<5% | Class |
|----|---------------|------------|--------|-------|-------|---|----------|--------|-------|-------|---|-----------------------------|------------------------------------|-------------|-------|
|    |               | mean       | SD     | SEM   | %CV   | N | mean     | SD     | SEM   | %CV   | N |                             |                                    |             |       |
| 26 | C3-OH         | 0.14       | 0.04   | 0.02  | 27.45 | 5 | 0.14     | 0.05   | 0.02  | 32.76 | 5 | 0.9708                      | Male_TBI                           |             | AC    |
| 27 | C3-1          | 0.09       | 0.04   | 0.02  | 41.94 | 5 | 0.10     | 0.05   | 0.02  | 47.30 | 5 | 0.6826                      | Male_TBI                           |             | AC    |
| 28 | C4            | 0.38       | 0.12   | 0.06  | 32.78 | 5 | 0.34     | 0.12   | 0.06  | 36.27 | 5 | 0.6554                      | Male_Naive                         |             | AC    |
| 29 | C4-1          | 0.10       | 0.03   | 0.01  | 30.93 | 5 | 0.11     | 0.03   | 0.01  | 25.31 | 5 | 0.7003                      | Male_TBI                           |             | AC    |
| 30 | C5            | 0.18       | 0.05   | 0.02  | 30.14 | 5 | 0.17     | 0.06   | 0.03  | 35.39 | 5 | 0.8482                      | Male_Naive                         |             | AC    |
| 31 | C5-DC_C6-OH   | 0.26       | 0.13   | 0.06  | 50.46 | 5 | 0.26     | 0.14   | 0.06  | 52.77 | 5 | 0.9503                      | Male_TBI                           |             | AC    |
| 32 | C5-M-DC       | 0.17       | 0.06   | 0.02  | 31.88 | 5 | 0.19     | 0.09   | 0.04  | 46.35 | 5 | 0.7522                      | Male_TBI                           |             | AC    |
| 33 | C5-OH_C3-DC-M | 0.16       | 0.05   | 0.02  | 29.31 | 5 | 0.15     | 0.05   | 0.02  | 33.73 | 5 | 0.8197                      | Male_Naive                         |             | AC    |
| 34 | C5-1          | 0.09       | 0.03   | 0.02  | 38.52 | 5 | 0.09     | 0.04   | 0.02  | 41.98 | 5 | 0.8762                      | Male_TBI                           |             | AC    |
| 35 | C5-1 DC       | 0.51       | 0.29   | 0.13  | 58.14 | 5 | 0.53     | 0.31   | 0.14  | 58.92 | 5 | 0.9168                      | Male_TBI                           |             | AC    |
| 36 | C6_C4-1 DC    | 0.22       | 0.11   | 0.05  | 50.59 | 5 | 0.23     | 0.11   | 0.05  | 47.77 | 5 | 0.8615                      | Male_TBI                           |             | AC    |
| 37 | C6-1          | 0.14       | 0.07   | 0.03  | 50.00 | 5 | 0.15     | 0.08   | 0.03  | 50.08 | 5 | 0.7991                      | Male_TBI                           |             | AC    |
| 38 | C7-DC         | 0.07       | 0.03   | 0.01  | 42.83 | 5 | 0.06     | 0.02   | 0.01  | 37.49 | 5 | 0.5311                      | Male_Naive                         |             | AC    |
| 39 | C8            | 0.12       | 0.04   | 0.02  | 33.85 | 5 | 0.12     | 0.03   | 0.01  | 24.89 | 5 | 0.9654                      | Male_Naive                         |             | AC    |
| 40 | C9            | 0.24       | 0.07   | 0.03  | 27.44 | 5 | 0.25     | 0.08   | 0.04  | 32.46 | 5 | 0.8312                      | Male_TBI                           |             | AC    |
| 41 | Ala           | 665.40     | 122.14 | 54.62 | 18.36 | 5 | 717.00   | 125.17 | 55.98 | 17.46 | 5 | 0.5280                      | Male_TBI                           |             | AA    |
| 42 | Arg           | 103.28     | 15.67  | 7.01  | 15.17 | 5 | 90.70    | 15.98  | 7.15  | 17.62 | 5 | 0.2443                      | Male_Naive                         |             | AA    |
| 43 | Asn           | 59.22      | 17.70  | 7.92  | 29.89 | 5 | 60.42    | 14.63  | 6.54  | 24.22 | 5 | 0.9099                      | Male_TBI                           |             | AA    |
| 44 | Asp           | 7.54       | 1.22   | 0.55  | 16.25 | 5 | 8.51     | 3.94   | 1.76  | 46.34 | 5 | 0.6116                      | Male_TBI                           |             | AA    |
| 45 | Cit           | 65.38      | 3.41   | 1.52  | 5.21  | 5 | 33.24    | 7.80   | 3.49  | 23.48 | 5 | 0.0000                      | Male_Naive                         | *           | AA    |
| 46 | Gln           | 723.20     | 159.33 | 71.25 | 22.03 | 5 | 772.40   | 83.83  | 37.49 | 10.85 | 5 | 0.5581                      | Male_TBI                           |             | AA    |
| 47 | Glu           | 44.88      | 8.67   | 3.88  | 19.33 | 5 | 39.36    | 7.19   | 3.22  | 18.27 | 5 | 0.3052                      | Male_Naive                         |             | AA    |
| 48 | Gly           | 253.40     | 47.18  | 21.10 | 18.62 | 5 | 262.80   | 41.43  | 18.53 | 15.76 | 5 | 0.7464                      | Male_TBI                           |             | AA    |
| 49 | Ile           | 126.10     | 17.93  | 8.02  | 14.22 | 5 | 112.14   | 14.57  | 6.52  | 12.99 | 5 | 0.2136                      | Male_Naive                         |             | AA    |
| 50 | Leu           | 298.60     | 78.32  | 35.03 | 26.23 | 5 | 265.80   | 38.94  | 17.42 | 14.65 | 5 | 0.4261                      | Male_Naive                         |             | AA    |

**Supplemental Table 5. (continued)**

| Metabolite |            | Male_Naive |       |       |       |   | Male_TBI |       |       |       |   | P value<br>Naive vs.<br>TBI | Differential<br>Expression<br>(Up) | *<br>FDR<5% | Class |
|------------|------------|------------|-------|-------|-------|---|----------|-------|-------|-------|---|-----------------------------|------------------------------------|-------------|-------|
|            |            | mean       | SD    | SEM   | %CV   | N | mean     | SD    | SEM   | %CV   | N |                             |                                    |             |       |
| 51         | Lys        | 338.00     | 70.16 | 31.38 | 20.76 | 5 | 385.80   | 60.82 | 27.20 | 15.76 | 5 | 0.2829                      | Male_TBI                           |             | AA    |
| 52         | Met        | 89.32      | 40.16 | 17.96 | 44.96 | 5 | 70.36    | 20.08 | 8.98  | 28.53 | 5 | 0.3727                      | Male_Naive                         |             | AA    |
| 53         | Orn        | 66.44      | 22.75 | 10.17 | 34.24 | 5 | 61.68    | 14.19 | 6.34  | 23.00 | 5 | 0.7017                      | Male_Naive                         |             | AA    |
| 54         | Phe        | 81.66      | 14.37 | 6.43  | 17.60 | 5 | 78.94    | 10.26 | 4.59  | 13.00 | 5 | 0.7394                      | Male_Naive                         |             | AA    |
| 55         | Pro        | 170.22     | 54.48 | 24.36 | 32.00 | 5 | 156.90   | 48.91 | 21.87 | 31.18 | 5 | 0.6948                      | Male_Naive                         |             | AA    |
| 56         | Ser        | 161.80     | 43.49 | 19.45 | 26.88 | 5 | 182.80   | 23.49 | 10.50 | 12.85 | 5 | 0.3699                      | Male_TBI                           |             | AA    |
| 57         | Thr        | 203.00     | 43.39 | 19.40 | 21.37 | 5 | 238.80   | 31.78 | 14.21 | 13.31 | 5 | 0.1749                      | Male_TBI                           |             | AA    |
| 58         | Trp        | 76.46      | 22.33 | 9.99  | 29.21 | 5 | 84.32    | 6.73  | 3.01  | 7.98  | 5 | 0.4727                      | Male_TBI                           |             | AA    |
| 59         | Tyr        | 89.64      | 13.77 | 6.16  | 15.36 | 5 | 91.10    | 24.36 | 10.90 | 26.74 | 5 | 0.9100                      | Male_TBI                           |             | AA    |
| 60         | Val        | 215.00     | 42.54 | 19.03 | 19.79 | 5 | 201.60   | 23.03 | 10.30 | 11.42 | 5 | 0.5529                      | Male_Naive                         |             | AA    |
| 61         | Ac-Orn     | 1.98       | 0.20  | 0.09  | 9.84  | 5 | 1.50     | 0.52  | 0.23  | 34.51 | 5 | 0.0872                      | Male_Naive                         |             | BA    |
| 62         | ADMA       | 0.72       | 0.05  | 0.02  | 7.11  | 5 | 0.59     | 0.09  | 0.04  | 15.63 | 5 | 0.0242                      | Male_Naive                         |             | BA    |
| 63         | alpha-AAA  | 9.54       | 1.62  | 0.72  | 16.94 | 5 | 7.33     | 1.22  | 0.55  | 16.69 | 5 | 0.0403                      | Male_Naive                         |             | BA    |
| 64         | Creatinine | 6.13       | 1.42  | 0.63  | 23.14 | 5 | 5.18     | 0.99  | 0.44  | 19.12 | 5 | 0.2564                      | Male_Naive                         |             | BA    |
| 65         | Kynurenine | 1.03       | 0.24  | 0.11  | 22.86 | 5 | 1.07     | 0.25  | 0.11  | 23.73 | 5 | 0.8130                      | Male_TBI                           |             | BA    |
| 66         | Met-SO     | 2.80       | 1.55  | 0.69  | 55.30 | 5 | 2.18     | 0.71  | 0.32  | 32.50 | 5 | 0.4398                      | Male_Naive                         |             | BA    |
| 67         | Spermidine | 1.08       | 0.28  | 0.12  | 25.78 | 5 | 0.67     | 0.10  | 0.05  | 15.15 | 5 | 0.0146                      | Male_Naive                         |             | BA    |
| 68         | Spermine   | 0.41       | 0.03  | 0.02  | 8.29  | 5 | 0.39     | 0.08  | 0.04  | 20.93 | 5 | 0.6408                      | Male_Naive                         |             | BA    |
| 69         | Taurine    | 530.20     | 76.92 | 34.40 | 14.51 | 5 | 455.60   | 78.84 | 35.26 | 17.31 | 5 | 0.1684                      | Male_Naive                         |             | BA    |
| 70         | total DMA  | 0.56       | 0.04  | 0.02  | 7.74  | 5 | 0.51     | 0.03  | 0.01  | 5.60  | 5 | 0.0766                      | Male_Naive                         |             | BA    |
| 71         | LPC_14-0   | 2.86       | 0.50  | 0.22  | 17.37 | 5 | 2.66     | 0.17  | 0.08  | 6.49  | 5 | 0.4220                      | Male_Naive                         |             | LPC   |
| 72         | LPC_16-0   | 170.65     | 25.14 | 11.24 | 14.73 | 5 | 164.10   | 20.59 | 9.21  | 12.55 | 5 | 0.6639                      | Male_Naive                         |             | LPC   |
| 73         | LPC_16-1   | 3.81       | 0.87  | 0.39  | 22.94 | 5 | 3.35     | 0.45  | 0.20  | 13.43 | 5 | 0.3231                      | Male_Naive                         |             | LPC   |
| 74         | LPC_17-0   | 2.40       | 0.52  | 0.23  | 21.69 | 5 | 2.43     | 0.40  | 0.18  | 16.64 | 5 | 0.9277                      | Male_TBI                           |             | LPC   |
| 75         | LPC_18-0   | 67.81      | 11.77 | 5.26  | 17.36 | 5 | 68.67    | 7.13  | 3.19  | 10.39 | 5 | 0.8925                      | Male_TBI                           |             | LPC   |

**Supplemental Table 5. (continued)**

| Metabolite |          | Male_Naive |       |       |       |   | Male_TBI |       |       |       |   | P value<br>Naïve vs.<br>TBI | Differential<br>Expression<br>(Up) | *<br>FDR<5% | Class |
|------------|----------|------------|-------|-------|-------|---|----------|-------|-------|-------|---|-----------------------------|------------------------------------|-------------|-------|
|            |          | mean       | SD    | SEM   | %CV   | N | mean     | SD    | SEM   | %CV   | N |                             |                                    |             |       |
| 76         | LPC_18-1 | 31.35      | 6.37  | 2.85  | 20.33 | 5 | 27.18    | 3.07  | 1.37  | 11.29 | 5 | 0.2241                      | Male_Naive                         |             | LPC   |
| 77         | LPC_18-2 | 126.84     | 22.32 | 9.98  | 17.59 | 5 | 116.35   | 15.47 | 6.92  | 13.30 | 5 | 0.4131                      | Male_Naive                         |             | LPC   |
| 78         | LPC_20-3 | 6.43       | 1.67  | 0.75  | 25.99 | 5 | 4.57     | 0.49  | 0.22  | 10.75 | 5 | 0.0441                      | Male_Naive                         |             | LPC   |
| 79         | LPC_20-4 | 29.91      | 8.80  | 3.93  | 29.41 | 5 | 29.64    | 3.04  | 1.36  | 10.27 | 5 | 0.9489                      | Male_Naive                         |             | LPC   |
| 80         | LPC_24-0 | 0.47       | 0.11  | 0.05  | 22.58 | 5 | 0.49     | 0.05  | 0.02  | 9.68  | 5 | 0.7795                      | Male_TBI                           |             | LPC   |
| 81         | LPC_26-0 | 0.24       | 0.03  | 0.02  | 14.42 | 5 | 0.25     | 0.06  | 0.03  | 22.64 | 5 | 0.8102                      | Male_TBI                           |             | LPC   |
| 82         | LPC_26-1 | 0.12       | 0.02  | 0.01  | 18.05 | 5 | 0.12     | 0.03  | 0.01  | 26.02 | 5 | 0.9392                      | Male_TBI                           |             | LPC   |
| 83         | LPC_28-0 | 0.29       | 0.03  | 0.01  | 9.79  | 5 | 0.34     | 0.08  | 0.04  | 24.91 | 5 | 0.2843                      | Male_TBI                           |             | LPC   |
| 84         | LPC_28-1 | 0.21       | 0.04  | 0.02  | 17.49 | 5 | 0.22     | 0.05  | 0.02  | 23.87 | 5 | 0.7571                      | Male_TBI                           |             | LPC   |
| 85         | PC_24-0  | 0.11       | 0.02  | 0.01  | 20.07 | 5 | 0.12     | 0.03  | 0.01  | 21.60 | 5 | 0.8559                      | Male_TBI                           |             | PC    |
| 86         | PC_26-0  | 0.78       | 0.14  | 0.06  | 18.51 | 5 | 0.81     | 0.19  | 0.09  | 23.74 | 5 | 0.8055                      | Male_TBI                           |             | PC    |
| 87         | PC_28-1  | 0.23       | 0.02  | 0.01  | 9.65  | 5 | 0.26     | 0.07  | 0.03  | 27.10 | 5 | 0.4409                      | Male_TBI                           |             | PC    |
| 88         | PC_30-0  | 0.80       | 0.12  | 0.05  | 15.09 | 5 | 0.75     | 0.07  | 0.03  | 9.75  | 5 | 0.4560                      | Male_Naive                         |             | PC    |
| 89         | PC_30-2  | 0.06       | 0.02  | 0.01  | 34.98 | 5 | 0.07     | 0.02  | 0.01  | 32.13 | 5 | 0.7168                      | Male_TBI                           |             | PC    |
| 90         | PC_32-0  | 13.96      | 2.24  | 1.00  | 16.03 | 5 | 14.65    | 1.57  | 0.70  | 10.71 | 5 | 0.5897                      | Male_TBI                           |             | PC    |
| 91         | PC_32-1  | 4.45       | 0.86  | 0.39  | 19.36 | 5 | 4.32     | 0.70  | 0.31  | 16.23 | 5 | 0.7882                      | Male_Naive                         |             | PC    |
| 92         | PC_32-2  | 1.37       | 0.28  | 0.13  | 20.50 | 5 | 1.43     | 0.18  | 0.08  | 12.93 | 5 | 0.7056                      | Male_TBI                           |             | PC    |
| 93         | PC_32-3  | 0.20       | 0.03  | 0.01  | 15.15 | 5 | 0.17     | 0.02  | 0.01  | 12.03 | 5 | 0.1265                      | Male_Naive                         |             | PC    |
| 94         | PC_34-1  | 105.66     | 10.65 | 4.76  | 10.08 | 5 | 93.36    | 8.23  | 3.68  | 8.81  | 5 | 0.0752                      | Male_Naive                         |             | PC    |
| 95         | PC_34-2  | 388.82     | 30.91 | 13.82 | 7.95  | 5 | 384.41   | 42.64 | 19.07 | 11.09 | 5 | 0.8561                      | Male_Naive                         |             | PC    |
| 96         | PC_34-3  | 17.79      | 2.90  | 1.30  | 16.30 | 5 | 19.53    | 2.53  | 1.13  | 12.94 | 5 | 0.3428                      | Male_TBI                           |             | PC    |
| 97         | PC_34-4  | 0.66       | 0.18  | 0.08  | 26.55 | 5 | 0.73     | 0.12  | 0.06  | 16.86 | 5 | 0.5047                      | Male_TBI                           |             | PC    |
| 98         | PC_36-0  | 2.28       | 0.46  | 0.21  | 20.17 | 5 | 2.27     | 0.24  | 0.11  | 10.41 | 5 | 0.9704                      | Male_Naive                         |             | PC    |
| 99         | PC_36-1  | 24.16      | 3.55  | 1.59  | 14.70 | 5 | 20.81    | 1.46  | 0.65  | 7.00  | 5 | 0.0870                      | Male_Naive                         |             | PC    |
| 100        | PC_36-2  | 249.21     | 27.87 | 12.47 | 11.18 | 5 | 236.89   | 18.15 | 8.12  | 7.66  | 5 | 0.4314                      | Male_Naive                         |             | PC    |

**Supplemental Table 5. (continued)**

| Metabolite |           | Male_Naive |       |       |       |   | Male_TBI |       |      |       |   | P value<br>Naive vs.<br>TBI | Differential<br>Expression<br>(Up) | *<br>FDR<5% | Class |
|------------|-----------|------------|-------|-------|-------|---|----------|-------|------|-------|---|-----------------------------|------------------------------------|-------------|-------|
|            |           | mean       | SD    | SEM   | %CV   | N | mean     | SD    | SEM  | %CV   | N |                             |                                    |             |       |
| 101        | PC_36-3   | 105.87     | 18.32 | 8.19  | 17.31 | 5 | 94.24    | 9.65  | 4.32 | 10.24 | 5 | 0.2448                      | Male_Naive                         |             | PC    |
| 102        | PC_36-4   | 168.46     | 32.06 | 14.34 | 19.03 | 5 | 180.30   | 15.34 | 6.86 | 8.51  | 5 | 0.4777                      | Male_TBI                           |             | PC    |
| 103        | PC_36-5   | 9.26       | 2.34  | 1.04  | 25.23 | 5 | 10.39    | 1.58  | 0.71 | 15.25 | 5 | 0.3974                      | Male_TBI                           |             | PC    |
| 104        | PC_36-6   | 0.42       | 0.12  | 0.05  | 29.01 | 5 | 0.47     | 0.09  | 0.04 | 18.59 | 5 | 0.5102                      | Male_TBI                           |             | PC    |
| 105        | PC_38-0   | 1.84       | 0.42  | 0.19  | 22.99 | 5 | 1.54     | 0.09  | 0.04 | 5.71  | 5 | 0.1499                      | Male_Naive                         |             | PC    |
| 106        | PC_38-1   | 0.53       | 0.16  | 0.07  | 30.65 | 5 | 0.42     | 0.06  | 0.03 | 13.77 | 5 | 0.1934                      | Male_Naive                         |             | PC    |
| 107        | PC_38-3   | 27.56      | 4.89  | 2.19  | 17.74 | 5 | 22.85    | 2.34  | 1.05 | 10.24 | 5 | 0.0875                      | Male_Naive                         |             | PC    |
| 108        | PC_38-4   | 97.53      | 23.64 | 10.57 | 24.24 | 5 | 108.25   | 13.23 | 5.92 | 12.22 | 5 | 0.4020                      | Male_TBI                           |             | PC    |
| 109        | PC_38-5   | 35.01      | 9.08  | 4.06  | 25.93 | 5 | 36.64    | 6.21  | 2.78 | 16.95 | 5 | 0.7493                      | Male_TBI                           |             | PC    |
| 110        | PC_38-6   | 133.00     | 28.12 | 12.58 | 21.15 | 5 | 142.58   | 16.93 | 7.57 | 11.87 | 5 | 0.5324                      | Male_TBI                           |             | PC    |
| 111        | PC_40-1   | 0.37       | 0.04  | 0.02  | 11.15 | 5 | 0.34     | 0.03  | 0.02 | 10.02 | 5 | 0.1924                      | Male_Naive                         |             | PC    |
| 112        | PC_40-2   | 0.47       | 0.04  | 0.02  | 9.13  | 5 | 0.36     | 0.03  | 0.01 | 8.16  | 5 | 0.0022                      | Male_Naive                         |             | PC    |
| 113        | PC_40-3   | 0.64       | 0.07  | 0.03  | 10.70 | 5 | 0.51     | 0.08  | 0.04 | 16.51 | 5 | 0.0246                      | Male_Naive                         |             | PC    |
| 114        | PC_40-4   | 2.73       | 0.41  | 0.18  | 14.91 | 5 | 2.27     | 0.28  | 0.13 | 12.51 | 5 | 0.0714                      | Male_Naive                         |             | PC    |
| 115        | PC_40-5   | 4.43       | 0.66  | 0.30  | 14.97 | 5 | 4.07     | 0.56  | 0.25 | 13.68 | 5 | 0.3742                      | Male_Naive                         |             | PC    |
| 116        | PC_40-6   | 38.71      | 8.74  | 3.91  | 22.57 | 5 | 41.33    | 5.01  | 2.24 | 12.12 | 5 | 0.5768                      | Male_TBI                           |             | PC    |
| 117        | PC_42-0   | 0.24       | 0.03  | 0.01  | 10.66 | 5 | 0.21     | 0.02  | 0.01 | 9.32  | 5 | 0.1310                      | Male_Naive                         |             | PC    |
| 118        | PC_42-1   | 0.16       | 0.02  | 0.01  | 12.59 | 5 | 0.15     | 0.02  | 0.01 | 11.12 | 5 | 0.4064                      | Male_Naive                         |             | PC    |
| 119        | PC_42-2   | 0.25       | 0.03  | 0.01  | 11.34 | 5 | 0.22     | 0.03  | 0.01 | 14.60 | 5 | 0.1501                      | Male_Naive                         |             | PC    |
| 120        | PC_42-4   | 0.25       | 0.04  | 0.02  | 14.71 | 5 | 0.22     | 0.02  | 0.01 | 9.89  | 5 | 0.1070                      | Male_Naive                         |             | PC    |
| 121        | PC_42-5   | 0.34       | 0.05  | 0.02  | 13.41 | 5 | 0.31     | 0.04  | 0.02 | 13.19 | 5 | 0.3374                      | Male_Naive                         |             | PC    |
| 122        | PC_42-6   | 1.01       | 0.10  | 0.05  | 10.16 | 5 | 0.88     | 0.07  | 0.03 | 8.27  | 5 | 0.0610                      | Male_Naive                         |             | PC    |
| 123        | PC_O-30-0 | 0.15       | 0.01  | 0.01  | 9.16  | 5 | 0.15     | 0.03  | 0.02 | 22.78 | 5 | 0.8823                      | Male_TBI                           |             | PC    |
| 124        | PC_O-30-1 | 0.15       | 0.03  | 0.01  | 22.10 | 5 | 0.13     | 0.04  | 0.02 | 31.53 | 5 | 0.5026                      | Male_Naive                         |             | PC    |
| 125        | PC_O-30-2 | 0.07       | 0.01  | 0.00  | 16.75 | 5 | 0.06     | 0.01  | 0.01 | 18.50 | 5 | 0.7072                      | Male_Naive                         |             | PC    |

**Supplemental Table 5. (continued)**

| Metabolite |           | Male_Naive |      |      |       |   | Male_TBI |      |      |       |   | P value<br>Naive vs.<br>TBI | Differential<br>Expression<br>(Up) | *<br>FDR<5% | Class |
|------------|-----------|------------|------|------|-------|---|----------|------|------|-------|---|-----------------------------|------------------------------------|-------------|-------|
|            |           | mean       | SD   | SEM  | %CV   | N | mean     | SD   | SEM  | %CV   | N |                             |                                    |             |       |
| 126        | PC_O-32-1 | 0.63       | 0.08 | 0.03 | 12.15 | 5 | 0.67     | 0.04 | 0.02 | 5.82  | 5 | 0.3999                      | Male_TBI                           |             | PC    |
| 127        | PC_O-32-2 | 0.29       | 0.04 | 0.02 | 13.01 | 5 | 0.23     | 0.02 | 0.01 | 10.72 | 5 | 0.0241                      | Male_Naive                         |             | PC    |
| 128        | PC_O-34-0 | 0.47       | 0.07 | 0.03 | 14.85 | 5 | 0.53     | 0.13 | 0.06 | 24.37 | 5 | 0.3646                      | Male_TBI                           |             | PC    |
| 129        | PC_O-34-1 | 3.17       | 0.57 | 0.25 | 17.93 | 5 | 2.92     | 0.25 | 0.11 | 8.57  | 5 | 0.4087                      | Male_Naive                         |             | PC    |
| 130        | PC_O-34-2 | 4.88       | 0.60 | 0.27 | 12.35 | 5 | 4.52     | 0.50 | 0.22 | 11.04 | 5 | 0.3295                      | Male_Naive                         |             | PC    |
| 131        | PC_O-34-3 | 1.46       | 0.18 | 0.08 | 12.59 | 5 | 1.10     | 0.06 | 0.03 | 5.91  | 5 | 0.0034                      | Male_Naive                         |             | PC    |
| 132        | PC_O-36-0 | 0.49       | 0.09 | 0.04 | 19.21 | 5 | 0.54     | 0.07 | 0.03 | 12.34 | 5 | 0.4135                      | Male_TBI                           |             | PC    |
| 133        | PC_O-36-1 | 2.31       | 0.32 | 0.14 | 13.96 | 5 | 2.18     | 0.12 | 0.06 | 5.74  | 5 | 0.4006                      | Male_Naive                         |             | PC    |
| 134        | PC_O-36-2 | 11.78      | 2.22 | 0.99 | 18.85 | 5 | 10.76    | 1.02 | 0.46 | 9.52  | 5 | 0.3773                      | Male_Naive                         |             | PC    |
| 135        | PC_O-36-3 | 2.65       | 0.41 | 0.18 | 15.53 | 5 | 2.56     | 0.27 | 0.12 | 10.50 | 5 | 0.6878                      | Male_Naive                         |             | PC    |
| 136        | PC_O-36-4 | 4.45       | 0.89 | 0.40 | 19.98 | 5 | 3.90     | 0.16 | 0.07 | 4.09  | 5 | 0.2065                      | Male_Naive                         |             | PC    |
| 137        | PC_O-36-5 | 2.06       | 0.52 | 0.23 | 25.08 | 5 | 1.93     | 0.17 | 0.07 | 8.68  | 5 | 0.5892                      | Male_Naive                         |             | PC    |
| 138        | PC_O-38-0 | 3.12       | 0.98 | 0.44 | 31.44 | 5 | 3.29     | 0.54 | 0.24 | 16.47 | 5 | 0.7400                      | Male_TBI                           |             | PC    |
| 139        | PC_O-38-1 | 0.85       | 0.15 | 0.07 | 18.13 | 5 | 0.70     | 0.06 | 0.03 | 8.19  | 5 | 0.0702                      | Male_Naive                         |             | PC    |
| 140        | PC_O-38-2 | 8.08       | 1.66 | 0.74 | 20.51 | 5 | 6.15     | 0.55 | 0.25 | 9.01  | 5 | 0.0388                      | Male_Naive                         |             | PC    |
| 141        | PC_O-38-3 | 2.08       | 0.48 | 0.22 | 23.15 | 5 | 1.78     | 0.18 | 0.08 | 10.14 | 5 | 0.2221                      | Male_Naive                         |             | PC    |
| 142        | PC_O-38-4 | 4.63       | 1.12 | 0.50 | 24.25 | 5 | 4.70     | 0.46 | 0.21 | 9.77  | 5 | 0.8955                      | Male_TBI                           |             | PC    |
| 143        | PC_O-38-5 | 3.72       | 0.97 | 0.44 | 26.16 | 5 | 3.23     | 0.17 | 0.08 | 5.29  | 5 | 0.3040                      | Male_Naive                         |             | PC    |
| 144        | PC_O-38-6 | 2.87       | 0.67 | 0.30 | 23.28 | 5 | 2.54     | 0.14 | 0.06 | 5.66  | 5 | 0.3056                      | Male_Naive                         |             | PC    |
| 145        | PC_O-40-1 | 3.98       | 1.09 | 0.49 | 27.38 | 5 | 4.53     | 0.77 | 0.35 | 17.10 | 5 | 0.3857                      | Male_TBI                           |             | PC    |
| 146        | PC_O-40-2 | 0.80       | 0.14 | 0.06 | 17.99 | 5 | 0.78     | 0.11 | 0.05 | 14.17 | 5 | 0.8036                      | Male_Naive                         |             | PC    |
| 147        | PC_O-40-3 | 0.71       | 0.16 | 0.07 | 22.51 | 5 | 0.58     | 0.07 | 0.03 | 11.54 | 5 | 0.1227                      | Male_Naive                         |             | PC    |
| 148        | PC_O-40-4 | 2.09       | 0.53 | 0.24 | 25.35 | 5 | 2.04     | 0.25 | 0.11 | 12.30 | 5 | 0.8699                      | Male_Naive                         |             | PC    |
| 149        | PC_O-40-5 | 1.10       | 0.24 | 0.11 | 21.54 | 5 | 1.00     | 0.10 | 0.04 | 9.97  | 5 | 0.4050                      | Male_Naive                         |             | PC    |
| 150        | PC_O-40-6 | 2.95       | 0.74 | 0.33 | 25.20 | 5 | 2.87     | 0.27 | 0.12 | 9.48  | 5 | 0.8287                      | Male_Naive                         |             | PC    |

**Supplemental Table 5. (continued)**

| Metabolite |            | Male_Naive |         |        |       |   | Male_TBI |         |         |       |   | P value<br>Naïve vs.<br>TBI | Differential<br>Expression<br>(Up) | *<br>FDR<5% | Class |
|------------|------------|------------|---------|--------|-------|---|----------|---------|---------|-------|---|-----------------------------|------------------------------------|-------------|-------|
|            |            | mean       | SD      | SEM    | %CV   | N | mean     | SD      | SEM     | %CV   | N |                             |                                    |             |       |
| 151        | PC_O-42-0  | 1.25       | 0.12    | 0.06   | 9.90  | 5 | 1.17     | 0.12    | 0.05    | 9.94  | 5 | 0.3479                      | Male_Naive                         |             | PC    |
| 152        | PC_O-42-1  | 0.61       | 0.12    | 0.06   | 20.12 | 5 | 0.63     | 0.10    | 0.04    | 15.42 | 5 | 0.8409                      | Male_TBI                           |             | PC    |
| 153        | PC_O-42-2  | 0.48       | 0.11    | 0.05   | 23.41 | 5 | 0.47     | 0.08    | 0.04    | 17.19 | 5 | 0.8456                      | Male_Naive                         |             | PC    |
| 154        | PC_O-42-3  | 1.30       | 0.34    | 0.15   | 26.38 | 5 | 1.35     | 0.23    | 0.10    | 17.11 | 5 | 0.8144                      | Male_TBI                           |             | PC    |
| 155        | PC_O-42-4  | 0.28       | 0.07    | 0.03   | 25.26 | 5 | 0.23     | 0.04    | 0.02    | 18.96 | 5 | 0.2376                      | Male_Naive                         |             | PC    |
| 156        | PC_O-42-5  | 0.64       | 0.08    | 0.04   | 12.52 | 5 | 0.63     | 0.06    | 0.03    | 8.98  | 5 | 0.6954                      | Male_Naive                         |             | PC    |
| 157        | PC_O-44-3  | 0.14       | 0.02    | 0.01   | 14.16 | 5 | 0.14     | 0.01    | 0.00    | 5.83  | 5 | 0.7434                      | Male_TBI                           |             | PC    |
| 158        | PC_O-44-4  | 0.16       | 0.03    | 0.01   | 17.83 | 5 | 0.14     | 0.02    | 0.01    | 11.87 | 5 | 0.2313                      | Male_Naive                         |             | PC    |
| 159        | PC_O-44-5  | 0.28       | 0.04    | 0.02   | 15.51 | 5 | 0.27     | 0.03    | 0.01    | 11.23 | 5 | 0.5508                      | Male_Naive                         |             | PC    |
| 160        | PC_O-44-6  | 0.21       | 0.04    | 0.02   | 17.48 | 5 | 0.19     | 0.01    | 0.00    | 4.55  | 5 | 0.2593                      | Male_Naive                         |             | PC    |
| 161        | SM_32-2 OH | 1.15       | 0.27    | 0.12   | 23.46 | 5 | 1.18     | 0.07    | 0.03    | 5.86  | 5 | 0.8224                      | Male_TBI                           |             | SM    |
| 162        | SM_34-2 OH | 0.31       | 0.05    | 0.02   | 16.78 | 5 | 0.33     | 0.01    | 0.00    | 2.04  | 5 | 0.5315                      | Male_TBI                           |             | SM    |
| 163        | SM_40-2 OH | 1.62       | 0.26    | 0.11   | 15.83 | 5 | 1.76     | 0.15    | 0.07    | 8.60  | 5 | 0.3226                      | Male_TBI                           |             | SM    |
| 164        | SM_40-3 OH | 1.37       | 0.35    | 0.16   | 25.45 | 5 | 1.29     | 0.14    | 0.06    | 10.92 | 5 | 0.6442                      | Male_Naive                         |             | SM    |
| 165        | SM_42-2 OH | 0.19       | 0.06    | 0.03   | 33.47 | 5 | 0.21     | 0.02    | 0.01    | 8.20  | 5 | 0.4522                      | Male_TBI                           |             | SM    |
| 166        | SM_34-1    | 18.99      | 3.04    | 1.36   | 15.99 | 5 | 20.04    | 0.73    | 0.33    | 3.66  | 5 | 0.4711                      | Male_TBI                           |             | SM    |
| 167        | SM_34-2    | 3.41       | 0.74    | 0.33   | 21.58 | 5 | 3.50     | 0.29    | 0.13    | 8.18  | 5 | 0.8012                      | Male_TBI                           |             | SM    |
| 168        | SM_36-1    | 1.73       | 0.35    | 0.15   | 19.96 | 5 | 2.02     | 0.07    | 0.03    | 3.31  | 5 | 0.1044                      | Male_TBI                           |             | SM    |
| 169        | SM_36-2    | 0.77       | 0.12    | 0.05   | 15.86 | 5 | 0.87     | 0.03    | 0.01    | 3.11  | 5 | 0.0935                      | Male_TBI                           |             | SM    |
| 170        | SM_38-3    | 0.07       | 0.02    | 0.01   | 32.83 | 5 | 0.08     | 0.02    | 0.01    | 26.68 | 5 | 0.8700                      | Male_TBI                           |             | SM    |
| 171        | SM_40-1    | 0.32       | 0.20    | 0.09   | 63.64 | 5 | 0.29     | 0.15    | 0.07    | 50.18 | 5 | 0.8109                      | Male_Naive                         |             | SM    |
| 172        | SM_42-1    | 6.63       | 0.46    | 0.21   | 6.98  | 5 | 6.06     | 0.88    | 0.39    | 14.51 | 5 | 0.2363                      | Male_Naive                         |             | SM    |
| 173        | SM_42-2    | 11.33      | 1.63    | 0.73   | 14.43 | 5 | 12.45    | 1.26    | 0.57    | 10.16 | 5 | 0.2607                      | Male_TBI                           |             | SM    |
| 174        | SM_44-1    | 0.02       | 0.00    | 0.00   | 16.66 | 5 | 0.03     | 0.02    | 0.01    | 73.12 | 5 | 0.4658                      | Male_TBI                           |             | SM    |
| 175        | H1         | 11317.60   | 1552.10 | 694.12 | 13.71 | 5 | 12644.47 | 2704.24 | 1209.37 | 21.39 | 5 | 0.3692                      | Male_TBI                           |             | S     |

**Supplemental Table 5. (continued)**

|     | Metabolite            | Male_Naive |        |        |       |   | Male_TBI |        |        |       |   | P value Naïve vs. TBI | Differential Expression (Up) | * FDR<5% | Class |
|-----|-----------------------|------------|--------|--------|-------|---|----------|--------|--------|-------|---|-----------------------|------------------------------|----------|-------|
|     |                       | mean       | SD     | SEM    | %CV   | N | mean     | SD     | SEM    | %CV   | N |                       |                              |          |       |
| 176 | C2,C3 / C0            | 0.67       | 0.10   | 0.05   | 15.05 | 5 | 0.74     | 0.10   | 0.04   | 13.44 | 5 | 0.2851                | Male_TBI                     |          | AC    |
| 177 | AAA                   | 247.76     | 38.06  | 17.02  | 15.36 | 5 | 254.36   | 38.15  | 17.06  | 15.00 | 5 | 0.7911                | Male_TBI                     |          | AA    |
| 178 | ADMA / Arg            | 0.01       | 0.00   | 0.00   | 17.40 | 5 | 0.01     | 0.00   | 0.00   | 18.74 | 5 | 0.5454                | Male_Naive                   |          | BA,AA |
| 179 | BCAA                  | 639.70     | 128.93 | 57.66  | 20.15 | 5 | 579.54   | 64.35  | 28.78  | 11.10 | 5 | 0.3778                | Male_Naive                   |          | AA    |
| 180 | C2 / C0               | 0.65       | 0.10   | 0.04   | 14.98 | 5 | 0.72     | 0.10   | 0.05   | 14.26 | 5 | 0.3116                | Male_TBI                     |          | AC    |
| 181 | Cit / Arg             | 0.64       | 0.10   | 0.04   | 14.91 | 5 | 0.36     | 0.04   | 0.02   | 11.02 | 5 | 0.0003                | Male_Naive                   | *        | AA    |
| 182 | Cit / Orn             | 1.10       | 0.45   | 0.20   | 40.82 | 5 | 0.55     | 0.11   | 0.05   | 19.49 | 5 | 0.0289                | Male_Naive                   |          | AA    |
| 183 | CPT-I ratio           | 0.02       | 0.00   | 0.00   | 18.02 | 5 | 0.02     | 0.00   | 0.00   | 15.74 | 5 | 0.0792                | Male_TBI                     |          | AA    |
| 184 | Essential AA          | 1428.14    | 284.60 | 127.28 | 19.93 | 5 | 1437.76  | 159.34 | 71.26  | 11.08 | 5 | 0.9490                | Male_TBI                     |          | AA    |
| 185 | Fisher ratio          | 2.58       | 0.32   | 0.14   | 12.43 | 5 | 2.30     | 0.27   | 0.12   | 11.62 | 5 | 0.1699                | Male_Naive                   |          | AA    |
| 186 | Glucogenic AA         | 1080.60    | 193.76 | 86.65  | 17.93 | 5 | 1162.60  | 167.01 | 74.69  | 14.37 | 5 | 0.4939                | Male_TBI                     |          | AA    |
| 187 | Kynurenine / Trp      | 0.01       | 0.00   | 0.00   | 19.88 | 5 | 0.01     | 0.00   | 0.00   | 19.87 | 5 | 0.4538                | Male_Naive                   |          | AA    |
| 188 | Met-SO / Met          | 0.03       | 0.01   | 0.00   | 18.09 | 5 | 0.03     | 0.00   | 0.00   | 9.15  | 5 | 0.9419                | Male_TBI                     |          | AA    |
| 189 | MUFA_PC               | 146.75     | 16.80  | 7.51   | 11.45 | 5 | 130.98   | 11.25  | 5.03   | 8.59  | 5 | 0.1195                | Male_Naive                   |          | PC    |
| 190 | MUFA_PC / SFA_PC      | 5.80       | 0.37   | 0.17   | 6.44  | 5 | 5.04     | 0.24   | 0.11   | 4.82  | 5 | 0.0053                | Male_Naive                   |          | PC    |
| 191 | Non essential AA      | 2175.30    | 265.17 | 118.59 | 12.19 | 5 | 2291.29  | 312.62 | 139.81 | 13.64 | 5 | 0.5446                | Male_TBI                     |          | AA    |
| 192 | Orn / Arg             | 0.63       | 0.14   | 0.06   | 22.57 | 5 | 0.69     | 0.18   | 0.08   | 25.68 | 5 | 0.5794                | Male_TBI                     |          | AA    |
| 193 | PUFA_PC               | 1344.15    | 195.30 | 87.34  | 14.53 | 5 | 1343.16  | 107.56 | 48.10  | 8.01  | 5 | 0.9923                | Male_Naive                   |          | PC    |
| 194 | PUFA_PC / MUFA_PC     | 9.15       | 0.69   | 0.31   | 7.57  | 5 | 10.27    | 0.62   | 0.28   | 6.06  | 5 | 0.0279                | Male_TBI                     |          | PC    |
| 195 | PUFA_PC / SFA_PC      | 52.90      | 2.78   | 1.24   | 5.25  | 5 | 51.69    | 2.05   | 0.92   | 3.96  | 5 | 0.4566                | Male_Naive                   |          | PC    |
| 196 | SFA_PC                | 25.51      | 4.26   | 1.90   | 16.69 | 5 | 26.04    | 2.57   | 1.15   | 9.88  | 5 | 0.8166                | Male_TBI                     |          | PC    |
| 197 | Spermine / Spermidine | 0.40       | 0.09   | 0.04   | 22.42 | 5 | 0.59     | 0.07   | 0.03   | 12.54 | 5 | 0.0068                | Male_TBI                     |          | BA    |
| 198 | Total_PC,SM           | 1564.02    | 220.92 | 98.80  | 14.13 | 5 | 1550.03  | 120.67 | 53.97  | 7.79  | 5 | 0.9041                | Male_Naive                   |          | PC,SM |
| 199 | Total AA              | 3838.54    | 584.95 | 261.60 | 15.24 | 5 | 3914.67  | 486.95 | 217.77 | 12.44 | 5 | 0.8286                | Male_TBI                     |          | AA    |
| 200 | Total AC / C0         | 0.95       | 0.16   | 0.07   | 16.45 | 5 | 1.09     | 0.07   | 0.03   | 6.30  | 5 | 0.1016                | Male_TBI                     |          | AC    |

**Supplemental Table 5. (continued)**

|     | Metabolite                    | Male_Naive |        |       |       |   | Male_TBI |        |       |       |   | P value<br>Naïve vs.<br>TBI | Differential<br>Expression<br>(Up) | *<br>FDR<5% | Class  |
|-----|-------------------------------|------------|--------|-------|-------|---|----------|--------|-------|-------|---|-----------------------------|------------------------------------|-------------|--------|
|     |                               | mean       | SD     | SEM   | %CV   | N | mean     | SD     | SEM   | %CV   | N |                             |                                    |             |        |
| 201 | Total AC-DC / Total AC        | 0.07       | 0.02   | 0.01  | 27.05 | 5 | 0.08     | 0.03   | 0.01  | 33.52 | 5 | 0.5833                      | Male_TBI                           |             | AC     |
| 202 | Total AC-OH / Total AC        | 0.04       | 0.01   | 0.00  | 21.42 | 5 | 0.04     | 0.01   | 0.01  | 26.08 | 5 | 0.6372                      | Male_TBI                           |             | AC     |
| 203 | Total LPC                     | 443.41     | 76.78  | 34.34 | 17.32 | 5 | 420.37   | 48.12  | 21.52 | 11.45 | 5 | 0.5853                      | Male_Naive                         |             | LPC    |
| 204 | Total LPC / Total PC          | 0.29       | 0.02   | 0.01  | 7.45  | 5 | 0.28     | 0.02   | 0.01  | 6.85  | 5 | 0.3969                      | Male_Naive                         |             | LPC,PC |
| 205 | Total PC                      | 1516.40    | 213.96 | 95.68 | 14.11 | 5 | 1500.18  | 118.39 | 52.95 | 7.89  | 5 | 0.8857                      | Male_Naive                         |             | PC     |
| 206 | Total PC_diacyl               | 1439.06    | 198.87 | 88.94 | 13.82 | 5 | 1428.61  | 112.80 | 50.45 | 7.90  | 5 | 0.9211                      | Male_Naive                         |             | PC     |
| 207 | Total PC_ether                | 77.35      | 15.34  | 6.86  | 19.83 | 5 | 71.57    | 5.88   | 2.63  | 8.22  | 5 | 0.4545                      | Male_Naive                         |             | PC     |
| 208 | Total SM                      | 47.62      | 7.12   | 3.18  | 14.94 | 5 | 49.84    | 3.26   | 1.46  | 6.54  | 5 | 0.5430                      | Male_TBI                           |             | SM     |
| 209 | Total SM / Total_SM,PC        | 0.03       | 0.00   | 0.00  | 3.11  | 5 | 0.03     | 0.00   | 0.00  | 5.88  | 5 | 0.0930                      | Male_TBI                           |             | SM,PC  |
| 210 | Total SM / Total PC           | 0.03       | 0.00   | 0.00  | 3.21  | 5 | 0.03     | 0.00   | 0.00  | 6.08  | 5 | 0.0931                      | Male_TBI                           |             | SM,PC  |
| 211 | Total SM-non OH               | 42.98      | 6.18   | 2.76  | 14.37 | 5 | 45.07    | 2.95   | 1.32  | 6.55  | 5 | 0.5131                      | Male_TBI                           |             | SM     |
| 212 | Total SM-OH                   | 4.64       | 0.98   | 0.44  | 21.01 | 5 | 4.77     | 0.35   | 0.15  | 7.25  | 5 | 0.7894                      | Male_TBI                           |             | SM     |
| 213 | Total SM-OH / Total SM-non OH | 0.11       | 0.01   | 0.00  | 8.93  | 5 | 0.11     | 0.00   | 0.00  | 3.67  | 5 | 0.7690                      | Male_Naive                         |             | SM     |
| 214 | Tyr / Phe                     | 1.11       | 0.12   | 0.05  | 10.70 | 5 | 1.14     | 0.19   | 0.08  | 16.37 | 5 | 0.7340                      | Male_TBI                           |             | AA     |
